# Supplementary material for: Mechanical and Hydric Stress Effects on Maize Root System Development at Different Soil Compaction Levels
Source: Front Plant Sci. 2019 Oct 29;10:1358. doi: 10.3389/fpls.2019.01358 (PMC6833975; doi:10.3389/fpls.2019.01358)
Supplement: Supplementary file 1 [file Table_1.xlsx]

## Sheet: Fig. 1
									Dataset from Moraes et al. (2019)
									Moraes M, Debiasi H, Franchini JC, Bonetti J, Levien R, Schnepf A and Leitner D (2019) Mechanical and Hydric Stress Effects on Maize Root System Development at Different Soil Compaction Levels. Front. Plant Sci. 10:1358. doi: 10.3389/fpls.2019.01358
									FIGURE 1 | Measured vs. calculated values of soil penetration resistance (SPR) curve fitted with parameters of Busscher equation from Table 1 for a Rhodic Eutrudox, very clayed. Dashed line represents a one-to-one relationship.
Cultura	camada	Parcela	Tratamento	Repetição	Cilindro	Pressão (kPa)	Ds	Uv	Water content (kg/kg)	Macroporosity (%)	Microporosity (%)	Total Porosity (%)	Soil penetration resistance (Mpa)	Bulk density (Mg/m3)	Soil water content (m3/m3)	SPR estimated with Eq. 1.1	SPR estimated with Eq. 1.3-1.6	SPR estimated with Eq. 1.2
#VALUE!	0_10	24	ESC	1	296	6	1.08827	36.5492	33.5847	15.6325	36.5492	52.1817	0.512358	1.08827	0.365492	1.2531	0.911512	0.911512
#VALUE!	0_10	16	ESC	2	613	6	0.956173	36.1955	37.8546	27.7364	36.1955	63.9319	0.528936	0.956173	0.361955	0.46098	0.289118	0.289118
#VALUE!	0_10	27	ESC	2	445	6	0.997546	41.3919	41.4937	18.808	41.3919	60.1999	0.497419	0.997546	0.413919	0.347828	0.245748	0.245748
#VALUE!	0_10	7	ESC	3	478	6	1.10394	40.6983	36.8664	15.8927	40.6983	56.591	0.545481	1.10394	0.406983	0.853086	0.66804	0.66804
#VALUE!	0_10	32	ESC	3	436	6	1.1306	42.6956	37.7636	14.8737	42.6956	57.5692	0.969811	1.1306	0.426956	0.827852	0.683015	0.683015
#VALUE!	0_10	12	PDN	1	16	6	1.30029	45.46	34.9614	8.26728	45.46	53.7273	1.95028	1.30029	0.4546	1.91332	1.76268	1.94968
#VALUE!	0_10	4	PDN	2	42	6	1.15249	44.2081	38.3589	12.5624	44.2081	56.7705	0.891262	1.15249	0.442081	0.822052	0.909591	1.01558
#VALUE!	0_10	40	PDN	2	143	6	1.2072	44.3011	36.6976	11.9016	44.3011	56.2028	1.55452	1.2072	0.443011	1.18398	1.2317	1.36501
#VALUE!	0_10	19	PDN	3	49	6	1.16214	44.9004	38.636	13.0054	44.9004	57.9059	1.31733	1.16214	0.449004	0.818051	0.881541	0.989605
#VALUE!	0_10	43	PDN	3	293	6	1.12465	43.3926	38.5832	14.5842	43.3926	57.9768	0.248667	1.12465	0.433926	0.735752	0.856049	0.952104
#VALUE!	0_10	2	C4	1	251	6	1.36768	47.3133	34.5939	1.9521	47.3133	49.2654	2.61221	1.36768	0.473133	2.38967	2.23582	2.2107
#VALUE!	0_10	21	C4	2	368	6	1.36933	48.1819	35.1865	2.01342	48.1819	50.1953	2.85952	1.36933	0.481819	2.2173	2.05559	2.02662
#VALUE!	0_10	46	C4	2	188	6	1.39125	48.2786	34.7017	0.572117	48.2786	48.8507	2.0219	1.39125	0.482786	2.49738	2.25704	2.22758
#VALUE!	0_10	8	C4	3	41	6	1.41133	48.483	34.3526	1.43186	48.483	49.9149	2.75679	1.41133	0.48483	2.7494	2.426	2.39568
#VALUE!	0_10	30	C4	3	215	6	1.31455	46.8115	35.6104	4.68515	46.8115	51.4966	1.74792	1.31455	0.468115	1.82337	1.822	1.79846
#VALUE!	0_10	1	C8	1	30	6	1.46199	46.8515	32.0464	1.72743	46.8515	48.5789	2.87212	1.46199	0.468515	4.28604	3.24321	3.61614
#VALUE!	0_10	33	C8	2	220	6	1.37908	48.9381	35.486	1.59287	48.9381	50.531	1.82106	1.37908	0.489381	2.18413	1.90961	1.95828
#VALUE!	0_10	6	C8	3	34	6	1.36408	50.0302	36.6767	0.613682	50.0302	50.6439	1.59413	1.36408	0.500302	1.80447	1.5963	1.62356
#VALUE!	0_10	20	C8	3	12	6	1.4021	49.2946	35.1577	0.910455	49.2946	50.2051	2.11952	1.4021	0.492946	2.41371	1.98232	2.1036
#VALUE!	0_10	44	C8	3	226	6	1.34581	48.9641	36.3826	1.96177	48.9641	50.9258	2.10726	1.34581	0.489641	1.7887	1.69404	1.66165
#VALUE!	10_20	24	ESC	1	419	6	1.24324	43.2211	34.765	9.69157	43.2211	52.9127	0.534528	1.24324	0.432211	1.68416	1.55347	1.55347
#VALUE!	10_20	16	ESC	2	661	6	1.31014	49.4339	37.7319	4.09129	49.4339	53.5252	1.13229	1.31014	0.494339	1.37725	1.44719	1.44719
#VALUE!	10_20	27	ESC	2	884	6	1.20219	45.2891	37.6722	6.81545	45.2891	52.1046	1.03317	1.20219	0.452891	1.03329	0.941823	0.941823
#VALUE!	10_20	7	ESC	3	672	6	1.32244	48.8126	36.911	3.86257	48.8126	52.6752	1.15702	1.32244	0.488126	1.57524	1.66106	1.66106
#VALUE!	10_20	32	ESC	3	753	6	1.06188	39.473	37.1726	15.5847	39.473	55.0576	0.349583	1.06188	0.39473	0.71858	0.530257	0.530257
#VALUE!	10_20	12	PDN	1	123	6	1.2769	45.8354	35.8958	7.65598	45.8354	53.4914	1.9517	1.2769	0.458354	1.5904	1.48729	1.65655
#VALUE!	10_20	4	PDN	2	693	6	1.26986	49.7668	39.1906	5.58867	49.7668	55.3554	1.52848	1.26986	0.497668	1.03738	0.89892	1.03966
#VALUE!	10_20	40	PDN	2	186	6	1.2057	45.0425	37.3579	10.7554	45.0425	55.7979	1.11594	1.2057	0.450425	1.08514	1.11183	1.2416
#VALUE!	10_20	19	PDN	3	69	6	1.24231	46.7324	37.6174	8.24452	46.7324	54.9769	1.56698	1.24231	0.467324	1.1642	1.10588	1.2486
#VALUE!	10_20	43	PDN	3	541	6	1.30104	46.4761	35.7222	10.042	46.4761	56.518	1.21925	1.30104	0.464761	1.73451	1.56141	1.74398
#VALUE!	10_20	2	C4	1	302	6	1.39486	46.7619	33.5244	3.15811	46.7619	49.92	2.40571	1.39486	0.467619	2.95834	2.69728	2.67675
#VALUE!	10_20	21	C4	2	563	6	1.36985	47.2938	34.5248	4.93704	47.2938	52.2308	1.98792	1.36985	0.472938	2.42513	2.26379	2.23883
#VALUE!	10_20	46	C4	2	222	6	1.37804	46.4207	33.686	3.26765	46.4207	49.6883	2.65774	1.37804	0.464207	2.7751	2.58592	2.56661
#VALUE!	10_20	8	C4	3	298	6	1.36411	45.9338	33.6731	3.96119	45.9338	49.895	2.03709	1.36411	0.459338	2.68489	2.55243	2.53553
#VALUE!	10_20	30	C4	3	676	6	1.32993	46.2086	34.7452	5.78493	46.2086	51.9935	2.14558	1.32993	0.462086	2.12746	2.09872	2.07816
#VALUE!	10_20	1	C8	1	674	6	1.44545	49.0487	33.9332	2.05402	49.0487	51.1028	2.85472	1.44545	0.490487	3.15936	2.35981	2.64082
#VALUE!	10_20	33	C8	2	335	6	1.36805	48.3348	35.3313	1.76074	48.3348	50.0956	2.67029	1.36805	0.483348	2.16839	1.97354	1.98107
#VALUE!	10_20	6	C8	3	243	6	1.33413	48.2104	36.1361	3.0094	48.2104	51.2198	1.98048	1.33413	0.482104	1.79182	1.77656	1.70083
#VALUE!	10_20	20	C8	3	212	6	1.37955	47.9683	34.7709	2.19725	47.9683	50.1655	2.57077	1.37955	0.479683	2.40378	2.1461	2.17873
#VALUE!	10_20	44	C8	3	365	6	1.29747	47.4878	36.6002	5.24423	47.4878	52.732	2.03368	1.29747	0.474878	1.53479	1.69615	1.5306
#VALUE!	20_30	24	ESC	1	421	6	1.37136	48.5333	35.3905	3.14923	48.5333	51.6826	1.46528	1.37136	0.485333	2.16952	2.37408	2.37408
#VALUE!	20_30	16	ESC	2	723	6	1.27942	49.1951	38.4512	3.77959	49.1951	52.9747	1.91529	1.27942	0.491951	1.16293	1.18727	1.18727
#VALUE!	20_30	27	ESC	2	888	6	1.35157	50.7179	37.5252	1.42313	50.7179	52.1411	1.84155	1.35157	0.507179	1.57197	1.73343	1.73343
#VALUE!	20_30	7	ESC	3	690	6	1.34502	50.4422	37.5028	4.0121	50.4422	54.4542	1.42321	1.34502	0.504422	1.55032	1.6954	1.6954
#VALUE!	20_30	32	ESC	3	765	6	1.24592	45.7641	36.7312	7.34861	45.7641	53.1127	1.11943	1.24592	0.457641	1.31367	1.25263	1.25263
#VALUE!	20_30	12	PDN	1	394	6	1.2403	48.64	39.2163	6.19	48.64	54.83	1.95717	1.2403	0.4864	0.954008	0.872047	1.0026
#VALUE!	20_30	4	PDN	2	709	6	1.25531	48.5453	38.6721	5.97481	48.5453	54.5201	1.33471	1.25531	0.485453	1.0609	0.956786	1.09668
#VALUE!	20_30	40	PDN	2	329	6	1.19802	44.1486	36.8513	12.0432	44.1486	56.1918	1.25557	1.19802	0.441486	1.1312	1.19254	1.32141
#VALUE!	20_30	19	PDN	3	217	6	1.18175	44.7294	37.85	10.5411	44.7294	55.2706	1.33142	1.18175	0.447294	0.953224	1.00926	1.12764
#VALUE!	20_30	43	PDN	3	692	6	1.33021	46.6271	35.0525	6.14695	46.6271	52.774	1.64245	1.33021	0.466271	2.04358	1.78215	1.98543
#VALUE!	20_30	2	C4	1	373	6	1.36457	48.3515	35.4336	1.51318	48.3515	49.8647	2.80613	1.36457	0.483515	2.12084	1.97403	1.94449
#VALUE!	20_30	21	C4	2	681	6	1.35327	47.02	34.7455	6.20747	47.02	53.2275	1.55264	1.35327	0.4702	2.25808	2.1531	2.12913
#VALUE!	20_30	46	C4	2	687	6	1.30223	48.1158	36.9487	6.04002	48.1158	54.1558	1.67181	1.30223	0.481158	1.48718	1.49137	1.46423
#VALUE!	20_30	8	C4	3	388	6	1.29462	45.3828	35.0548	5.62662	45.3828	51.0094	1.75868	1.29462	0.453828	1.86166	1.92876	1.91105
#VALUE!	20_30	30	C4	3	701	6	1.38281	47.1139	34.071	2.84024	47.1139	49.9541	2.28505	1.38281	0.471139	2.66363	2.45409	2.43055
#VALUE!	20_30	1	C8	1	688	6	1.37699	49.196	35.7272	3.29973	49.196	52.4957	1.51155	1.37699	0.49196	2.10542	1.83935	1.88628
#VALUE!	20_30	33	C8	2	679	6	1.32008	49.8134	37.7353	4.79449	49.8134	54.6079	1.94811	1.32008	0.498134	1.41279	1.39921	1.33699
#VALUE!	20_30	6	C8	3	427	6	1.36096	51.7866	38.0516	1.45273	51.7866	53.2394	2.01726	1.36096	0.517866	1.50876	1.29467	1.33567
#VALUE!	20_30	20	C8	3	641	6	1.32106	49.7	37.6212	2.68165	49.7	52.3816	2.01708	1.32106	0.497	1.43649	1.42275	1.35969
#VALUE!	20_30	44	C8	3	416	6	1.28902	48.4518	37.588	6.62606	48.4518	55.0779	1.23189	1.28902	0.484518	1.32601	1.46453	1.31997
#VALUE!	0_10	38	ESC	1	446	10	1.05108	38.6319	36.7546	17.1675	40.3995	57.567	0.582039	1.05108	0.386319	0.73128	0.527405	0.527405
#VALUE!	0_10	22	ESC	2	564	10	1.05407	35.2597	33.451	17.2023	36.8391	54.0414	0.897525	1.05407	0.352597	1.14422	0.788047	0.788047
#VALUE!	0_10	28	ESC	2	438	10	1.05917	39.1914	37.0019	15.6417	41.5371	57.1789	0.716458	1.05917	0.391914	0.727711	0.533417	0.533417
#VALUE!	0_10	17	ESC	3	417	10	0.883708	33.4254	37.824	24.047	35.0176	59.0645	0.18549	0.883708	0.334254	0.35319	0.194509	0.194509
#VALUE!	0_10	31	ESC	3	526	10	0.941304	35.3314	37.5345	24.9337	37.2861	62.2198	0.339109	0.941304	0.353314	0.454466	0.276513	0.276513
#VALUE!	0_10	11	PDN	1	227	10	1.28299	42.8629	33.4086	7.62695	44.0424	51.6693	2.08981	1.28299	0.428629	2.25732	2.24552	2.42537
#VALUE!	0_10	37	PDN	1	28	10	1.19644	41.2373	34.4665	12.7649	43.2962	56.0611	0.726509	1.19644	0.412373	1.53706	1.73924	1.86992
#VALUE!	0_10	34	PDN	2	128	10	1.13683	38.6599	34.0069	16.5743	40.6851	57.2594	1.28163	1.13683	0.386599	1.37317	1.77123	1.86752
#VALUE!	0_10	5	PDN	3	37	10	1.19024	42.919	36.0592	10.5586	44.6905	55.2491	1.59679	1.19024	0.42919	1.22384	1.33879	1.46664
#VALUE!	0_10	29	PDN	3	205	10	1.3165	45.0943	34.2532	5.12027	46.9508	52.0711	1.30594	1.3165	0.450943	2.1956	2.00716	2.20718
#VALUE!	0_10	35	C4	1	89	10	1.30935	44.0197	33.6194	6.68272	44.9227	51.6055	2.55923	1.30935	0.440197	2.35054	2.42239	2.41465
#VALUE!	0_10	48	C4	1	1	10	1.29482	47.509	36.6916	0.620248	49.4498	50.07	2.46096	1.29482	0.47509	1.50648	1.53196	1.50649
#VALUE!	0_10	15	C4	2	337	10	1.40225	47.1426	33.6193	1.36355	47.8745	49.238	2.60343	1.40225	0.471426	2.973	2.67977	2.65705
#VALUE!	0_10	18	C4	3	86	10	1.30684	45.8601	35.0924	5.55333	46.9126	52.4659	1.96571	1.30684	0.458601	1.91297	1.94505	1.92545
#VALUE!	0_10	41	C4	3	102	10	1.33654	45.6393	34.1474	3.74487	47.9824	51.7272	2.32048	1.33654	0.456393	2.34577	2.30781	2.29087
#VALUE!	0_10	25	C8	1	494	10	1.43325	48.4607	33.8117	1.54509	48.5016	50.0467	1.94585	1.43325	0.484607	3.12053	2.42892	2.65906
#VALUE!	0_10	3	C8	2	60	10	1.26664	51.4063	40.5847	1.6715	51.6865	53.358	1.8034	1.26664	0.514063	0.874105	0.958254	0.863276
#VALUE!	0_10	9	C8	2	55	10	1.31499	49.1785	37.3984	0.514061	49.4809	49.995	1.98736	1.31499	0.491785	1.45358	1.4788	1.39349
#VALUE!	0_10	39	C8	2	117	10	1.3964	48.7344	34.9001	0.34017	49.0845	49.4247	1.70443	1.3964	0.487344	2.46305	2.07619	2.1735
#VALUE!	0_10	42	C8	3	80	10	1.41649	46.0976	32.5435	1.39265	47.0394	48.432	2.69594	1.41649	0.460976	3.5803	3.06104	3.19311
#VALUE!	10_20	38	ESC	1	796	10	1.1175	40.5148	36.2547	13.005	42.2964	55.3014	0.673462	1.1175	0.405148	0.961502	0.76131	0.76131
#VALUE!	10_20	22	ESC	2	726	10	1.03204	37.6259	36.4579	17.6603	39.6739	57.3342	0.505	1.03204	0.376259	0.713251	0.496995	0.496995
#VALUE!	10_20	28	ESC	2	535	10	1.34823	47.9462	35.5624	2.60212	49.6233	52.2254	2.02962	1.34823	0.479462	2.00102	2.13484	2.13484
#VALUE!	10_20	17	ESC	3	654	10	1.13373	39.7636	35.0734	15.0504	41.6105	56.6609	0.747864	1.13373	0.397636	1.17844	0.938543	0.938543
#VALUE!	10_20	31	ESC	3	627	10	1.25388	42.2604	33.7038	9.49219	43.7751	53.2673	0.931887	1.25388	0.422604	2.00296	1.84255	1.84255
#VALUE!	10_20	11	PDN	1	318	10	1.29538	44.5165	34.3656	5.91757	45.4945	51.412	2.12613	1.29538	0.445165	2.04582	1.93458	2.12137
#VALUE!	10_20	37	PDN	1	73	10	1.23839	42.3587	34.2048	9.19968	44.0479	53.2475	0.909238	1.23839	0.423587	1.79215	1.88812	2.04164
#VALUE!	10_20	34	PDN	2	156	10	1.21962	43.1578	35.3864	9.54587	45.0911	54.637	1.68904	1.21962	0.431578	1.45229	1.53111	1.67407
#VALUE!	10_20	5	PDN	3	137	10	1.25545	42.9706	34.2272	8.36097	43.7042	52.0651	1.06557	1.25545	0.429706	1.87249	1.91046	2.0739
#VALUE!	10_20	29	PDN	3	218	10	1.40272	45.8817	32.7091	6.93878	46.5201	53.4589	2.12049	1.40272	0.458817	3.38166	2.8001	3.06757
#VALUE!	10_20	35	C4	1	107	10	1.32626	45.2608	34.1266	4.58338	46.1855	50.7689	2.30505	1.32626	0.452608	2.29105	2.28879	2.27358
#VALUE!	10_20	48	C4	1	54	10	1.31091	47.1726	35.9847	4.40144	47.6639	52.0654	2.48802	1.31091	0.471726	1.72042	1.72121	1.6964
#VALUE!	10_20	15	C4	2	407	10	1.2899	45.701	35.4299	6.3738	46.7957	53.1695	1.44144	1.2899	0.45701	1.74972	1.81798	1.79864
#VALUE!	10_20	18	C4	3	399	10	1.37242	46.4794	33.8668	3.4002	46.9308	50.331	2.64	1.37242	0.464794	2.66918	2.50178	2.4817
#VALUE!	10_20	41	C4	3	139	10	1.34719	46.5903	34.5833	3.85658	47.3737	51.2303	2.3434	1.34719	0.465903	2.27244	2.19005	2.1681
#VALUE!	10_20	25	C8	1	521	10	1.40446	49.4293	35.1947	1.1144	49.7522	50.8666	1.79623	1.40446	0.494293	2.4158	1.96717	2.09701
#VALUE!	10_20	3	C8	2	176	10	1.30612	48.0012	36.7511	2.54847	48.9506	51.4991	2.03396	1.30612	0.480012	1.54037	1.64583	1.51204
#VALUE!	10_20	9	C8	2	129	10	1.30188	45.6708	35.0805	5.51356	46.1143	51.6279	1.81858	1.30188	0.456708	1.89123	2.15756	1.91868
#VALUE!	10_20	39	C8	2	174	10	1.42145	46.4496	32.6776	1.41816	47.0488	48.467	3.21009	1.42145	0.464496	3.55484	2.97936	3.14063
#VALUE!	10_20	42	C8	3	91	10	1.40446	45.6226	32.4842	3.71777	46.2423	49.96	2.89481	1.40446	0.456226	3.50676	3.1191	3.18551
#VALUE!	20_30	38	ESC	1	883	10	1.22366	44.8262	36.6328	6.24961	46.1799	52.4295	1.28269	1.22366	0.448262	1.25047	1.15587	1.15587
#VALUE!	20_30	22	ESC	2	836	10	1.19145	43.4644	36.4802	7.84519	45.0029	52.848	0.874216	1.19145	0.434644	1.16358	1.02709	1.02709
#VALUE!	20_30	28	ESC	2	896	10	1.37766	48.8677	35.4715	2.20417	49.2435	51.4477	2.50613	1.37766	0.488677	2.18055	2.40714	2.40714
#VALUE!	20_30	17	ESC	3	832	10	1.32032	45.0543	34.1238	5.27598	46.4266	51.7026	1.87667	1.32032	0.450543	2.25689	2.27522	2.27522
#VALUE!	20_30	31	ESC	3	733	10	1.38037	46.5987	33.758	2.6227	47.6559	50.2786	2.42352	1.38037	0.465987	2.76364	2.98012	2.98012
#VALUE!	20_30	11	PDN	1	696	10	1.28054	46.5988	36.3899	5.53669	47.4941	53.0308	1.6033	1.28054	0.465988	1.50707	1.38093	1.54865
#VALUE!	20_30	37	PDN	1	181	10	1.24483	42.8628	34.4326	7.8445	44.1587	52.0032	1.7976	1.24483	0.428628	1.76885	1.82915	1.98647
#VALUE!	20_30	34	PDN	2	249	10	1.25414	44.8861	35.7903	6.20295	46.1909	52.3939	1.91821	1.25414	0.448861	1.51593	1.48184	1.64049
#VALUE!	20_30	5	PDN	3	201	10	1.30819	44.3425	33.8961	4.4877	45.4417	49.9294	2.14314	1.30819	0.443425	2.25577	2.1147	2.31072
#VALUE!	20_30	29	PDN	3	277	10	1.31419	42.9545	32.6851	7.39627	44.0569	51.4532	2.09298	1.31419	0.429545	2.71379	2.61194	2.81156
#VALUE!	20_30	35	C4	1	575	10	1.28793	48.2282	37.4463	5.32455	48.4739	53.7985	1.34573	1.28793	0.482282	1.34556	1.3714	1.34463
#VALUE!	20_30	48	C4	1	225	10	1.22942	47.3347	38.5016	4.06041	48.2048	52.2652	1.82519	1.22942	0.473347	1.00829	1.11289	1.09009
#VALUE!	20_30	15	C4	2	606	10	1.28222	47.5803	37.1079	3.98127	48.8014	52.7827	1.76346	1.28222	0.475803	1.38237	1.4264	1.40114
#VALUE!	20_30	18	C4	3	695	10	1.28952	45.8829	35.5814	5.32533	47.685	53.0104	1.63767	1.28952	0.458829	1.71361	1.77844	1.75832
#VALUE!	20_30	41	C4	3	219	10	1.24935	43.9436	35.1732	7.0058	45.6526	52.6584	1.55212	1.24935	0.439436	1.62222	1.79933	1.78675
#VALUE!	20_30	25	C8	1	583	10	1.36649	39.5092	28.9129	9.14612	40.8259	49.972	0.862427	1.36649	0.395092
#VALUE!	20_30	3	C8	2	397	10	1.25253	47.1813	37.6689	5.88765	48.0625	53.9501	1.65811	1.25253	0.471813	1.18975	1.48748	1.25397
#VALUE!	20_30	9	C8	2	279	10	1.3308	49.9098	37.5038	1.30234	50.4508	51.7532	2.39132	1.3308	0.499098	1.49467	1.43828	1.39628
#VALUE!	20_30	39	C8	2	178	10	1.34135	48.1259	35.8787	3.28723	48.657	51.9443	2.59925	1.34135	0.481259	1.88696	1.84146	1.77881
#VALUE!	20_30	42	C8	3	403	10	1.28748	45.8476	35.6104	6.09277	47.2544	53.3471	1.75934	1.28748	0.458476	1.69787	2.00083	1.74699
#VALUE!	0_10	14	ESC	1	48	33	0.934316	29.5126	31.5874	23.586	35.3289	58.915	0.886698	0.934316	0.295126	0.988038	0.541114	0.541114
#VALUE!	0_10	38	ESC	1	691	33	1.02316	33.626	32.8649	18.8363	40.9182	59.7545	0.891667	1.02316	0.33626	1.12179	0.728731	0.728731
#VALUE!	0_10	7	ESC	3	411	33	1.02635	31.366	30.5607	18.5404	37.5595	56.0998	1.15642	1.02635	0.31366	1.58981	0.99818	0.99818
#VALUE!	0_10	32	ESC	3	458	33	0.860771	30.7883	35.7682	21.3415	36.8524	58.194	0.63798	0.860771	0.307883	0.418525	0.214187	0.214187
#VALUE!	0_10	10	PDN	2	162	33	1.01239	34.3856	33.9649	17.0629	38.6314	55.6943	0.7364	1.01239	0.343856	0.928268	1.56455	1.59887
#VALUE!	0_10	34	PDN	2	164	33	1.10907	37.1733	33.5176	15.5006	42.6719	58.1725	1.27094	1.10907	0.371733	1.34957	1.86972	1.9459
#VALUE!	0_10	19	PDN	3	144	33	1.19576	40.3219	33.7207	9.91802	45.7908	55.7089	1.57267	1.19576	0.403219	1.69832	1.96733	2.09432
#VALUE!	0_10	43	PDN	3	51	33	1.31009	42.6099	32.5244	4.88983	46.9967	51.8865	2.38377	1.31009	0.426099	2.74715	2.67641	2.87226
#VALUE!	0_10	2	C4	1	230	33	1.32866	39.1731	29.4831	5.96656	44.9995	50.9661	3.53771	1.32866	0.391731	4.55079	4.80455	4.88859
#VALUE!	0_10	35	C4	1	165	33	1.34438	42.4831	31.6006	3.47397	47.9307	51.4047	3.03406	1.34438	0.424831	3.43178	3.4435	3.46068
#VALUE!	0_10	45	C4	2	374	33	1.42571	44.0337	30.8855	1.052	46.8991	47.9511	3.22877	1.42571	0.440337	4.66849	4.21503	4.23277
#VALUE!	0_10	18	C4	3	108	33	1.22889	37.304	30.3558	11.3591	42.8026	54.1616	2.76991	1.22889	0.37304	3.04083	3.69586	3.76518
#VALUE!	0_10	23	C8	1	135	33	1.40793	45.3941	32.2417	0.815464	47.3372	48.1526	1.81905	1.40793	0.453941	3.66198	3.24864	3.32393
#VALUE!	0_10	3	C8	2	81	33	1.36677	45.3513	33.1814	1.45743	47.2007	48.6582	2.1025	1.36677	0.453513	2.89425	2.83442	2.74525
#VALUE!	0_10	33	C8	2	94	33	1.38205	45.2457	32.7382	1.37412	47.7031	49.0772	2.69486	1.38205	0.452457	3.20059	3.02941	2.99074
#VALUE!	0_10	44	C8	3	106	33	1.3824	42.8514	30.9979	1.57741	47.3827	48.9601	2.84114	1.3824	0.428514	4.12972	4.14665	3.97828
#VALUE!	10_20	14	ESC	1	828	33	1.06734	35.5882	33.3428	16.9016	40.7615	57.6631	0.778462	1.06734	0.355882	1.2125	0.850949	0.850949
#VALUE!	10_20	38	ESC	1	869	33	1.15138	37.0431	32.1728	12.524	43.7171	56.2412	1.76437	1.15138	0.370431	1.85617	1.44741	1.44741
#VALUE!	10_20	7	ESC	3	591	33	1.18172	38.0154	32.1696	9.34888	44.9457	54.2946	1.24743	1.18172	0.380154	2.03019	1.65219	1.65219
#VALUE!	10_20	32	ESC	3	841	33	1.09872	36.0483	32.8095	16.5056	41.9192	58.4248	1.14212	1.09872	0.360483	1.44332	1.05316	1.05316
#VALUE!	10_20	10	PDN	2	173	33	1.21113	39.4987	32.6132	9.35783	44.2225	53.5803	2.08604	1.21113	0.394987	2.07236	2.41144	2.53774
#VALUE!	10_20	34	PDN	2	319	33	1.15515	39.1727	33.9114	12.2196	43.8401	56.0597	1.48048	1.15515	0.391727	1.46961	1.8325	1.93789
#VALUE!	10_20	19	PDN	3	170	33	1.3084	43.7311	33.4233	6.3194	47.3753	53.6947	2.97962	1.3084	0.437311	2.40934	2.29017	2.48695
#VALUE!	10_20	43	PDN	3	536	33	1.32411	42.046	31.7542	5.26076	46.8358	52.0965	2.58736	1.32411	0.42046	3.18506	3.10251	3.30348
#VALUE!	10_20	2	C4	1	278	33	1.35585	42.3496	31.2348	2.95207	46.5726	49.5247	3.57365	1.35585	0.423496	3.72979	3.69815	3.72131
#VALUE!	10_20	35	C4	1	171	33	1.37575	43.4608	31.5905	3.91348	46.1268	50.0402	2.69219	1.37575	0.434608	3.7197	3.56832	3.5799
#VALUE!	10_20	45	C4	2	393	33	1.33393	41.5217	31.1273	5.57888	45.2909	50.8698	3.15733	1.33393	0.415217	3.5842	3.67388	3.70367
#VALUE!	10_20	18	C4	3	264	33	1.29106	41.3772	32.049	6.72605	46.1816	52.9076	2.10676	1.29106	0.413772	2.79794	3.02136	3.03891
#VALUE!	10_20	23	C8	1	297	33	1.38244	43.9444	31.7876	2.85029	46.4246	49.2749	2.28906	1.38244	0.439444	3.67418	3.58793	3.48911
#VALUE!	10_20	3	C8	2	321	33	1.32122	43.9839	33.2903	4.16458	46.6633	50.8279	2.24368	1.32122	0.439839	2.53789	2.87462	2.57404
#VALUE!	10_20	33	C8	2	142	33	1.32051	41.6172	31.5159	5.61877	44.9804	50.5991	2.68877	1.32051	0.416172	3.26799	3.94118	3.42285
#VALUE!	10_20	44	C8	3	118	33	1.40617	42.5408	30.2529	2.97565	45.4964	48.4721	3.25387	1.40617	0.425408	4.90259	4.691	4.62535
#VALUE!	20_30	14	ESC	1	851	33	1.09238	34.9914	32.0322	12.4341	40.554	52.9881	1.3234	1.09238	0.349914	1.58189	1.12867	1.12867
#VALUE!	20_30	38	ESC	1	900	33	1.3187	42.335	32.1037	3.60832	47.9435	51.5518	2.84095	1.3187	0.42335	2.98484	2.90584	2.90584
#VALUE!	20_30	7	ESC	3	664	33	1.25434	41.5166	33.0983	5.73849	48.6023	54.3408	1.98857	1.25434	0.415166	2.1819	1.98886	1.98886
#VALUE!	20_30	32	ESC	3	876	33	1.27151	41.0058	32.2496	6.18591	46.5416	52.7275	2.4425	1.27151	0.410058	2.57948	2.37099	2.37099
#VALUE!	20_30	10	PDN	2	698	33	1.27184	42.8312	33.6765	8.10182	47.3527	55.4545	2.12048	1.27184	0.428312	2.11097	2.12518	2.29825
#VALUE!	20_30	34	PDN	2	383	33	1.198	39.8499	33.2637	10.3752	44.7624	55.1376	1.68425	1.198	0.398499	1.8212	2.12986	2.25471
#VALUE!	20_30	19	PDN	3	381	33	1.29426	42.7032	32.9942	5.09726	46.8628	51.9601	2.15774	1.29426	0.427032	2.46506	2.43395	2.62037
#VALUE!	20_30	43	PDN	3	316	33	1.30395	42.9963	32.974	5.52264	47.5851	53.1077	2.62048	1.30395	0.429963	2.53606	2.4631	2.65626
#VALUE!	20_30	2	C4	1	675	33	1.35511	46.2387	34.1217	3.62737	50.0824	53.7098	2.68212	1.35511	0.462387	2.46804	2.3642	2.34463
#VALUE!	20_30	35	C4	1	270	33	1.30998	43.0588	32.8698	5.87529	46.2817	52.1569	2.66048	1.30998	0.430588	2.61469	2.71659	2.71792
#VALUE!	20_30	45	C4	2	422	33	1.29512	42.8126	33.0569	7.47651	47.0473	54.5238	2.23619	1.29512	0.428126	2.44891	2.59579	2.59692
#VALUE!	20_30	18	C4	3	330	33	1.32857	42.0158	31.6249	3.79962	46.5653	50.365	3.1733	1.32857	0.420158	3.28369	3.37092	3.39042
#VALUE!	20_30	23	C8	1	352	33	1.37595	43.5874	31.6781	1.42057	47.2189	48.6395	2.26255	1.37595	0.435874	3.67393	3.67665	3.52927
#VALUE!	20_30	3	C8	2	708	33	1.28512	44.382	34.5352	4.9087	48.5472	53.4559	2.3234	1.28512	0.44382	1.94578	2.39092	2.04476
#VALUE!	20_30	33	C8	2	184	33	1.3031	44.6354	34.2533	3.11688	47.8821	50.999	2.36752	1.3031	0.446354	2.11992	2.47274	2.17587
#VALUE!	20_30	44	C8	3	673	33	1.33818	43.0108	32.1412	5.54252	47.1932	52.7357	2.19821	1.33818	0.430108	3.12169	3.4749	3.14725
#VALUE!	0_10	36	ESC	1	432	100	1.01983	31.1796	30.5733	19.0989	38.2181	57.0133	0.708218	1.01983	0.311796	1.55246	0.964781	0.964781
#VALUE!	0_10	16	ESC	2	453	100	1.11481	38.2956	34.3517	15.2351	42.7455	58.2021	1.49264	1.11481	0.382956	1.2253	0.938665	0.938665
#VALUE!	0_10	22	ESC	2	791	100	0.950632	30.5513	32.1379	19.5271	35.2264	56.7889	0.905446	0.950632	0.305513	0.967503	0.550266	0.550266
#VALUE!	0_10	28	ESC	2	410	100	1.02476	30.7255	29.9831	19.0752	36.4034	61.4895	0.491456	1.02476	0.307255	1.72808	1.07115	1.07115
#VALUE!	0_10	31	ESC	3	406	100	1.15737	36.2184	31.2937	14.7272	40.9532	59.6284	2.59914	1.15737	0.362184	2.14928	1.66527	1.66527
#VALUE!	0_10	12	PDN	1	98	100	1.3074	39.4487	30.1734	6.58144	45.9802	52.5617	3.17811	1.3074	0.394487	3.8667	4.08373	4.23617
#VALUE!	0_10	26	PDN	1	29	100	1.23411	39.7828	32.236	7.83387	46.8825	54.7164	2.39	1.23411	0.397828	2.33315	2.63098	2.7682
#VALUE!	0_10	37	PDN	1	239	100	1.2039	38.1891	31.7211	10.2751	45.2026	55.4777	1.62353	1.2039	0.381891	2.30978	2.80249	2.90844
#VALUE!	0_10	4	PDN	2	273	100	1.18461	38.1579	32.2113	10.3254	44.7469	55.0723	1.58135	1.18461	0.381579	2.03498	2.5229	2.62498
#VALUE!	0_10	29	PDN	3	39	100	1.23036	39.0589	31.7459	8.00642	46.7643	54.7707	2.69817	1.23036	0.390589	2.47941	2.85955	2.98581
#VALUE!	0_10	13	C4	1	43	100	1.34645	40.8455	30.3357	3.28133	47.4786	50.7599	3.6959	1.34645	0.408455	4.17175	4.24248	4.29199
#VALUE!	0_10	21	C4	2	136	100	1.33249	41.305	30.9983	4.5514	47.0144	51.5658	4.27095	1.33249	0.41305	3.6406	3.74582	3.77909
#VALUE!	0_10	46	C4	2	110	100	1.289	41.6265	32.2935	2.27181	49.9196	52.1914	2.73663	1.289	0.416265	2.68604	2.90071	2.91426
#VALUE!	0_10	8	C4	3	244	100	1.38012	43.7013	31.6647	1.12977	49.0402	50.17	3.54123	1.38012	0.437013	3.71953	3.54276	3.55201
#VALUE!	0_10	41	C4	3	66	100	1.35674	44.2597	32.622	0.741334	49.7696	50.5109	3.34057	1.35674	0.442597	3.05427	2.97211	2.96918
#VALUE!	0_10	23	C8	1	20	100	1.40792	46.8606	33.2836	0.419916	48.7702	49.1902	1.78571	1.40792	0.468606	3.15842	2.70557	2.81569
#VALUE!	0_10	47	C8	1	291	100	1.37221	45.2336	32.964	0.590177	49.3248	49.915	3.16547	1.37221	0.452336	3.02498	2.93228	2.8568
#VALUE!	0_10	39	C8	2	140	100	1.42169	45.4955	32.0011	0.982062	48.7624	49.7445	2.6681	1.42169	0.454955	3.9202	3.35974	3.50357
#VALUE!	0_10	6	C8	3	250	100	1.39831	45.1318	32.2759	0.382217	48.8433	49.2255	3.34226	1.39831	0.451318	3.5593	3.25046	3.27409
#VALUE!	0_10	42	C8	3	274	100	1.36002	39.3154	28.9079	3.98359	45.4909	49.4745	4.25208	1.36002	0.393154	5.40262	6.29439	5.59715
#VALUE!	10_20	36	ESC	1	461	100	1.22864	38.9165	31.6744	8.00806	46.0337	54.0417	2.22575	1.22864	0.389165	2.49361	2.14548	2.14548
#VALUE!	10_20	16	ESC	2	724	100	1.26679	41.5486	32.7983	6.50921	46.9951	53.5043	2.0141	1.26679	0.415486	2.35464	2.17077	2.17077
#VALUE!	10_20	22	ESC	2	812	100	1.05486	26.2422	24.8773	17.0686	39.7793	56.8478	0.891132	1.05486	0.262422
#VALUE!	10_20	28	ESC	2	847	100	1.11779	34.0197	30.4348	14.0081	40.6868	54.6949	1.10529	1.11779	0.340197	2.17123	1.56509	1.56509
#VALUE!	10_20	31	ESC	3	625	100	1.1168	35.1594	31.4822	13.0854	41.6814	54.7669	1.75472	1.1168	0.351594	1.84953	1.35577	1.35577
#VALUE!	10_20	12	PDN	1	236	100	1.35288	38.8994	28.7531	6.05303	44.8124	50.8654	4.29808	1.35288	0.388994	5.44	5.5772	5.7139
#VALUE!	10_20	26	PDN	1	360	100	1.345	41.5881	30.9206	5.6146	46.2503	51.8648	3.31453	1.345	0.415881	3.8031	3.67131	3.87909
#VALUE!	10_20	37	PDN	1	245	100	1.28292	39.1409	30.5093	7.25275	45.3846	52.6374	4.12689	1.28292	0.391409	3.4423	3.75449	3.89436
#VALUE!	10_20	4	PDN	2	317	100	1.23887	39.6719	32.0226	8.12244	45.6337	53.7561	2.635	1.23887	0.396719	2.43828	2.74372	2.88123
#VALUE!	10_20	29	PDN	3	203	100	1.30814	40.8687	31.2419	5.25212	46.3904	51.6425	3.59019	1.30814	0.408687	3.29537	3.35548	3.53566
#VALUE!	10_20	13	C4	1	238	100	1.28926	37.7604	29.2884	7.86258	43.2692	51.1318	3.77198	1.28926	0.377604	4.23318	4.75266	4.85241
#VALUE!	10_20	21	C4	2	267	100	1.31636	40.2029	30.5409	4.96133	45.5057	50.467	3.43771	1.31636	0.402029	3.74159	3.9661	4.01496
#VALUE!	10_20	46	C4	2	175	100	1.29408	41.9924	32.4497	4.86637	47.2078	52.0742	2.70676	1.29408	0.419924	2.66205	2.84729	2.85744
#VALUE!	10_20	8	C4	3	309	100	1.3772	42.478	30.8436	2.5641	47.1655	49.7296	3.98151	1.3772	0.42478	4.17246	4.03302	4.06179
#VALUE!	10_20	41	C4	3	328	100	1.34913	42.9414	31.829	2.67946	48.0204	50.6999	2.53162	1.34913	0.429414	3.35919	3.33781	3.34957
#VALUE!	10_20	23	C8	1	111	100	1.37996	44.4858	32.2371	3.0489	47.8366	50.8855	2.4599	1.37996	0.444858	3.42079	3.31532	3.23451
#VALUE!	10_20	47	C8	1	347	100	1.36747	42.1021	30.7884	5.00451	45.9633	50.9678	3.63915	1.36747	0.421021	4.10629	4.35732	4.05955
#VALUE!	10_20	39	C8	2	339	100	1.38948	44.6263	32.1172	0.918072	48.2886	49.2067	2.58745	1.38948	0.446263	3.56363	3.36459	3.32983
#VALUE!	10_20	6	C8	3	375	100	1.38535	43.9395	31.7174	5.73516	47.3726	53.1078	3.25972	1.38535	0.439395	3.73901	3.62646	3.53998
#VALUE!	10_20	42	C8	3	305	100	1.39496	41.7362	29.9193	2.07977	46.6392	48.719	3.68425	1.39496	0.417362	5.02227	5.03899	4.84635
#VALUE!	20_30	36	ESC	1	774	100	1.31425	42.827	32.5866	3.39945	48.4927	51.8922	2.66105	1.31425	0.42827	2.75258	2.68642	2.68642
#VALUE!	20_30	16	ESC	2	756	100	1.24294	39.0212	31.3943	6.70296	44.4971	51.2001	2.97769	1.24294	0.390212	2.70383	2.35969	2.35969
#VALUE!	20_30	22	ESC	2	853	100	1.21445	41.2658	33.979	6.89454	45.8385	52.7331	1.63121	1.21445	0.412658	1.72862	1.51544	1.51544
#VALUE!	20_30	28	ESC	2	859	100	1.25255	39.7859	31.7638	5.24571	46.1113	51.357	2.49712	1.25255	0.397859	2.62915	2.33847	2.33847
#VALUE!	20_30	31	ESC	3	872	100	1.30242	42.0583	32.2923	4.27951	47.5894	51.8689	2.18548	1.30242	0.420583	2.7836	2.66358	2.66358
#VALUE!	20_30	12	PDN	1	497	100	1.38937	39.3512	28.323	5.68081	45.123	50.8038	6.26886	1.38937	0.393512	6.3923	6.2597	6.41524
#VALUE!	20_30	26	PDN	1	359	100	1.28075	42.3038	33.0304	6.16095	47.7323	53.8932	3.53	1.28075	0.423038	2.3659	2.39037	2.56756
#VALUE!	20_30	37	PDN	1	271	100	1.26012	41.0365	32.5656	4.88099	47.4741	52.3551	2.69078	1.26012	0.410365	2.39024	2.54298	2.70265
#VALUE!	20_30	4	PDN	2	371	100	1.29138	42.0024	32.5251	4.7866	47.8161	52.6027	3.10125	1.29138	0.420024	2.61475	2.63291	2.81487
#VALUE!	20_30	29	PDN	3	697	100	1.3395	42.0368	31.3825	4.97939	47.4997	52.4791	3.668	1.3395	0.420368	3.50023	3.36005	3.56987
#VALUE!	20_30	13	C4	1	700	100	1.32325	42.614	32.2039	4.87788	48.1561	53.0339	3.83467	1.32325	0.42614	2.97686	3.05758	3.06702
#VALUE!	20_30	21	C4	2	447	100	1.30027	44.0928	33.9106	2.42572	49.5481	51.9738	2.40443	1.30027	0.440928	2.20491	2.29547	2.28612
#VALUE!	20_30	46	C4	2	262	100	1.30083	42.4567	32.6381	3.89428	47.5123	51.4065	3.45019	1.30083	0.424567	2.63799	2.7865	2.79264
#VALUE!	20_30	8	C4	3	590	100	1.37753	45.2538	32.8515	4.14905	50.5183	54.6674	2.69135	1.37753	0.452538	3.11443	2.93365	2.92393
#VALUE!	20_30	41	C4	3	333	100	1.36004	43.6883	32.1227	2.9039	48.119	51.0229	2.5881	1.36004	0.436883	3.30884	3.2245	3.22893
#VALUE!	20_30	23	C8	1	207	100	1.36376	43.1878	31.6683	4.65889	46.7398	51.3987	2.94406	1.36376	0.431878	3.56865	3.7152	3.49133
#VALUE!	20_30	47	C8	1	725	100	1.33681	43.3766	32.4479	2.23321	48.3762	50.6094	3.48387	1.33681	0.433766	2.97635	3.29348	2.99084
#VALUE!	20_30	39	C8	2	378	100	1.28102	44.3175	34.5955	4.62016	48.5468	53.167	2.54509	1.28102	0.443175	1.90901	2.37442	2.01721
#VALUE!	20_30	6	C8	3	482	100	1.37817	45.4529	32.9806	3.7955	50.1171	53.9126	3.08066	1.37817	0.454529	3.06302	2.91149	2.86656
#VALUE!	20_30	42	C8	3	481	100	1.37069	44.3783	32.3765	2.64364	49.727	52.3707	3.21717	1.37069	0.443783	3.27638	3.25532	3.13297
#VALUE!	0_10	14	ESC	1	745	500	1.05002	29.0255	27.6428	18.9437	39.2585	58.2021	1.81481	1.05002	0.290255	2.7411	1.69268	1.69268
#VALUE!	0_10	24	ESC	1	553	500	1.02465	26.4505	25.8142	21.6951	35.0938	56.7889	1.74686	1.02465	0.264505	3.46531	1.98111	1.98111
#VALUE!	0_10	36	ESC	1	475	500	0.985025	27.4058	27.8224	20.3641	36.6493	57.0133	1.2867	0.985025	0.274058	2.13671	1.19203	1.19203
#VALUE!	0_10	27	ESC	2	435	500	0.879214	26.2469	29.8527	26.7609	34.7286	61.4895	0.665566	0.879214	0.262469	1.0432	0.501485	0.501485
#VALUE!	0_10	17	ESC	3	451	500	0.79171	24.4357	30.8645	26.7105	32.918	59.6284	0.497755	0.79171	0.244357	0.623759	0.256954	0.256954
#VALUE!	0_10	11	PDN	1	263	500	1.22996	33.5597	27.2853	10.2446	43.7244	53.969	5.99651	1.22996	0.335597	5.00772	6.73759	6.57551
#VALUE!	0_10	26	PDN	1	14	500	1.16706	32.9299	28.2162	12.9181	43.172	56.0901	5.01905	1.16706	0.329299	3.57903	5.25083	5.12993
#VALUE!	0_10	10	PDN	2	71	500	1.20179	33.7963	28.1216	12.0471	44.0318	56.0789	5.52717	1.20179	0.337963	4.01969	5.53201	5.43861
#VALUE!	0_10	40	PDN	2	114	500	1.26615	34.6831	27.3926	10.4079	44.6811	55.089	7.21057	1.26615	0.346831	5.43095	6.80911	6.70825
#VALUE!	0_10	5	PDN	3	133	500	1.2342	34.7558	28.1606	10.1122	45.4748	55.587	6.5361	1.2342	0.347558	4.37522	5.65643	5.6037
#VALUE!	0_10	13	C4	1	229	500	1.37592	35.2647	25.6299	4.43556	45.3347	49.7702	8.89585	1.37592	0.352647	9.83919	10.2638	10.6587
#VALUE!	0_10	48	C4	1	4	500	1.30802	38.5257	29.4534	1.36766	51.6895	53.0571	6.414	1.30802	0.385257	4.33338	4.71904	4.80823
#VALUE!	0_10	15	C4	2	19	500	1.34184	37.6664	28.0707	4.11288	47.4932	51.6061	6.16971	1.34184	0.376664	5.91447	6.24703	6.40313
#VALUE!	0_10	45	C4	2	166	500	1.34835	37.0019	27.4424	3.19585	46.949	50.1448	6.93692	1.34835	0.370019	6.68084	7.05397	7.25459
#VALUE!	0_10	30	C4	3	281	500	1.43587	37.4811	26.1034	3.39547	46.1159	49.5113	10.5499	1.43587	0.374811	10.4582	9.96362	10.2817
#VALUE!	0_10	1	C8	1	13	500	1.43853	38.9363	27.0666	1.60562	47.4862	49.0918	10.1425	1.43853	0.389363	8.89293	8.70286	8.53277
#VALUE!	0_10	25	C8	1	235	500	1.46631	40.3449	27.5145	0.511329	47.4133	47.9246	8.0441	1.46631	0.403449	8.79763	7.77305	8.04439
#VALUE!	0_10	47	C8	1	32	500	1.3208	39.3065	29.7595	3.34673	49.9397	53.2864	6.125	1.3208	0.393065	4.26985	5.4799	4.61791
#VALUE!	0_10	9	C8	2	104	500	1.3882	41.3237	29.7677	1.24161	48.8335	50.0751	5.84528	1.3882	0.413237	5.0575	5.2129	4.94292
#VALUE!	0_10	20	C8	3	488	500	1.36036	42.3697	31.1459	0.497631	50.9716	51.4692	5.93457	1.36036	0.423697	3.82278	4.09805	3.79456
#VALUE!	10_20	14	ESC	1	705	500	1.05875	30.0604	28.3922	16.2215	38.9923	55.2138	1.37769	1.05875	0.300604	2.49023	1.58149	1.58149
#VALUE!	10_20	24	ESC	1	740	500	1.17821	31.0088	26.3185	13.4755	39.0127	52.4882	2.74819	1.17821	0.310088	5.11118	3.71475	3.71475
#VALUE!	10_20	36	ESC	1	763	500	1.16951	34.912	29.8519	12.0703	44.694	56.7642	2.726	1.16951	0.34912	2.7738	2.13145	2.13145
#VALUE!	10_20	27	ESC	2	747	500	0.980991	28.1505	28.696	20.8175	37.8769	58.6945	1.28301	0.980991	0.281505	1.82474	1.02814	1.02814
#VALUE!	10_20	17	ESC	3	861	500	1.2427	32.7643	26.3655	8.78259	43.2813	52.0639	5.26857	1.2427	0.327643	6.08458	4.83173	4.83173
#VALUE!	10_20	11	PDN	1	306	500	1.21379	35.0215	28.853	8.98809	44.9505	53.9385	7.05981	1.21379	0.350215
#VALUE!	10_20	26	PDN	1	163	500	1.25343	36.147	28.8385	7.44968	46.5906	54.0403	5.96606	1.25343	0.36147	4.13024	5.0308	5.05766
#VALUE!	10_20	10	PDN	2	310	500	1.27646	35.366	27.7063	8.43096	45.4591	53.8901	4.2467	1.27646	0.35366	5.29608	6.44274	6.39331
#VALUE!	10_20	40	PDN	2	130	500	1.15172	32.2915	28.0376	11.6949	41.2502	52.9451	5.18181	1.15172	0.322915	3.52281	5.36217	5.20564
#VALUE!	10_20	5	PDN	3	138	500	1.2602	35.1003	27.8529	8.41479	45.329	53.7438	7.16387	1.2602	0.351003	4.94566	6.16315	6.1095
#VALUE!	10_20	13	C4	1	252	500	1.33133	37.4387	28.1212	5.39702	45.8196	51.2166	7.14377	1.33133	0.374387	5.70927	6.11924	6.27411
#VALUE!	10_20	48	C4	1	284	500	1.30018	37.6733	28.9754	5.78662	46.6144	52.401	5.21933	1.30018	0.376733	4.5805	5.08043	5.19287
#VALUE!	10_20	15	C4	2	398	500	1.44292	44.2012	30.6333	1.69696	46.581	48.2779	3.00698	1.44292	0.442012	5.05348	4.47161	4.49232
#VALUE!	10_20	45	C4	2	355	500	1.30453	36.9587	28.331	6.82638	45.7398	52.5662	5.56255	1.30453	0.369587	5.14403	5.71981	5.86663
#VALUE!	10_20	30	C4	3	361	500	1.36658	38.4592	28.1426	3.3917	46.8434	50.2351	6.154	1.36658	0.384592	6.22222	6.33504	6.48139
#VALUE!	10_20	1	C8	1	248	500	1.43169	40.006	27.9431	0.648638	48.099	48.7476	7.83557	1.43169	0.40006	7.54378	7.27889	7.17783
#VALUE!	10_20	25	C8	1	492	500	1.36294	41.6975	30.5937	3.82843	49.1012	52.9296	7.33419	1.36294	0.416975
#VALUE!	10_20	47	C8	1	124	500	1.36991	39.2825	28.6752	1.68827	48.8192	50.5075	6.81132	1.36991	0.392825	5.75054	6.54763	5.8975
#VALUE!	10_20	9	C8	2	206	500	1.39046	41.6917	29.9841	0.661455	49.4388	50.1002	6.27971	1.39046	0.416917	4.91727	4.99231	4.77041
#VALUE!	10_20	20	C8	3	515	500	1.42114	42.5037	29.9081	0.580397	50.0903	50.6707	5.34548	1.42114	0.425037	5.36217	4.95942	4.98352
#VALUE!	20_30	14	ESC	1	874	500	1.20391	33.7098	28.0003	9.08513	44.1511	53.2362	4.90434	1.20391	0.337098	4.12607	3.21254	3.21254
#VALUE!	20_30	24	ESC	1	866	500	1.19807	30.9642	25.845	13.5501	38.9706	52.5207	3.89106	1.19807	0.309642	5.88931	4.3567	4.3567
#VALUE!	20_30	36	ESC	1	899	500	1.20094	39.3422	32.7595	5.29586	47.123	52.4189	2.29057	1.20094	0.393422	1.97176	1.66398	1.66398
#VALUE!	20_30	27	ESC	2	890	500	1.10169	34.334	31.1648	10.3526	43.8298	54.1824	2.65324	1.10169	0.34334	1.85033	1.31908	1.31908
#VALUE!	20_30	17	ESC	3	878	500	1.35243	38.7688	28.666	2.58322	48.5151	51.0983	5.99283	1.35243	0.387688	5.51111	5.26157	5.26157
#VALUE!	20_30	11	PDN	1	548	500	1.31469	38.4291	29.2305	8.66213	48.7011	57.3633	5.49085	1.31469	0.384291	4.56805	4.91883	5.03818
#VALUE!	20_30	26	PDN	1	198	500	1.26967	39.3461	30.9891	6.20938	48.1652	54.3746	5.61676	1.26967	0.393461	3.08949	3.39685	3.53825
#VALUE!	20_30	10	PDN	2	680	500	1.27385	38.9737	30.5952	7.27359	48.73	56.0036	4.73777	1.27385	0.389737	3.31603	3.66569	3.79988
#VALUE!	20_30	40	PDN	2	331	500	1.19167	34.3502	28.8253	11.1791	43.8234	55.0025	4.47695	1.19167	0.343502	3.48093	4.76378	4.72463
#VALUE!	20_30	5	PDN	3	346	500	1.11671	33.9706	30.4204	11.5904	46.662	58.2524	3.41113	1.11671	0.339706	2.16879	3.26281	3.25807
#VALUE!	20_30	13	C4	1	402	500	1.4591	38.6515	26.49	1.44093	47.1854	48.6264	10.6947	1.4591	0.386515	10.3194	9.47169	9.7382
#VALUE!	20_30	48	C4	1	533	500	1.28382	39.5076	30.7735	6.07498	48.1054	54.1804	5.21557	1.28382	0.395076	3.31499	3.67883	3.72672
#VALUE!	20_30	15	C4	2	395	500	1.37575	40.4556	29.4062	2.17784	48.0731	50.2509	6.33123	1.37575	0.404556	5.19043	5.12467	5.20249
#VALUE!	20_30	45	C4	2	677	500	1.29346	39.4071	30.4665	6.79433	47.8341	54.6284	4.47362	1.29346	0.394071	3.56338	3.91283	3.96802
#VALUE!	20_30	30	C4	3	682	500	1.30516	39.3154	30.1229	4.37405	48.2576	52.6317	5.97667	1.30516	0.393154	3.87412	4.19889	4.26313
#VALUE!	20_30	1	C8	1	440	500	1.39615	41.6014	29.7972	2.46676	48.5872	51.0539	9.45783	1.39615	0.416014
#VALUE!	20_30	25	C8	1	898	500	1.30014	41.9013	32.2283	3.65887	51.896	55.5548	5.35321	1.30014	0.419013	2.79253	3.51848	2.98072
#VALUE!	20_30	47	C8	1	154	500	1.36791	42.0889	30.7687	2.87495	49.3768	52.2517	6.24181	1.36791	0.420889	4.12318	4.37204	4.07502
#VALUE!	20_30	9	C8	2	362	500	1.3331	40.8513	30.6438	3.50526	48.9835	52.4887	6.71028	1.3331	0.408513	3.84656	4.58901	4.0153
#VALUE!	20_30	20	C8	3	542	500	1.33712	44.2691	33.1079	4.71445	49.8167	54.5312	3.62396	1.33712	0.442691	2.71246	2.93263	2.69345

## Sheet: Table 1
TABLE 1 | Empirical parameters fitted to the models of soil penetration resistance in soil compaction levels in an Oxisol.
Compaction level	SPR modelI	R2	Equation
All treatments	0.00587 BD8.0772 θ-4.65	0.96*	1.1
All NTs	0.00562 BD6.6124 θ-5.2170	0.93*	1.2
MTC	0.00669 BD9.1823 θ-4.1110	0.92*	1.3
NT	0.00341 BD6.7933 θ-5.6626	0.93*	1.4
NTC4	0.00661 BD6.5249 θ-5.0519	0.95*	1.5
NTC8	0.00674 BD4.7799 θ-5.7517	0.94*	1.6
Isoil penetration resistance model: SPR= a*BDb*θc; BD: bulk density (Mg m-3); θ: soil water content (m3 m-3); R2= [1-(SQerror/SQmodel)]; *significant at 5% level of probability by F-test; IImeans followed by the same letter did not differ at the 5% level of probability by Tukey test. All treatments is all compaction level (MTC, NT, NTC4, and NTC8) data used to fitting the Busscher equation. All N…

## Sheet: Figure 2
FIGURE 2 | Soil bulk density of a profile of Rhodic Eutrudox under (A) minimum tillage with chiseling, (B) no-tillage, (C) no-tillage with four tractor passes, and (D) no-tillage with eight harvester passes.
Position x (cm)	Position y (Depth cm)	MTC	NT	NTC4	NTC8
-15	-5	1.02082	1.07102	1.29122	1.39174			——————————				——————————				——————————				——————————
0	-5	1.05346	1.11333	1.15352	1.22392			Gridding Report MTC				Gridding Report NT				Gridding Report NTC4				Gridding Report NTC8
15	-5	1.07241	1.14122	1.24088	1.32191			——————————				——————————				——————————				——————————
-15	-15	1.15908	1.27541	1.25661	1.31038
0	-15	1.11163	1.23664	1.23611	1.30856			Sun Jan 08 12:57:14 2017				Sun Jan 08 13:01:39 2017				Sun Jan 08 13:03:27 2017				Sun Jan 08 13:05:00 2017
15	-15	1.15786	1.21096	1.27069	1.33952			Elapsed time for gridding:	0.00 seconds			Elapsed time for gridding:	0.00 seconds			Elapsed time for gridding:	0.01 seconds			Elapsed time for gridding:	0.00 seconds
-15	-25	1.22997	1.23518	1.33805	1.26565
0	-25	1.22424	1.20932	1.2798	1.25047
15	-25	1.23743	1.23494	1.27713	1.27079			Data Source				Data Source				Data Source				Data Source
-15	-35	1.25071	1.17632	1.19153	1.21051
0	-35	1.24398	1.15982	1.22335	1.15423			Source Data File Name:	H:\Artigo 3 raizes de Milho\Densidade do solo Março 2014\Densidade do solo Março 2014.bln			Source Data File Name:	H:\Artigo 3 raizes de Milho\Densidade do solo Março 2014\Densidade do solo Março 2014.bln			Source Data File Name:	H:\Artigo 3 raizes de Milho\Densidade do solo Março 2014\Densidade do solo Março 2014.bln			Source Data File Name:	H:\Artigo 3 raizes de Milho\Densidade do solo Março 2014\Densidade do solo Março 2014.bln
15	-35	1.22559	1.18857	1.18019	1.16068			X Column:	A			X Column:	A			X Column:	A			X Column:	A
-15	-45	1.15933	1.09369	1.1501	1.08962			Y Column:	B			Y Column:	B			Y Column:	B			Y Column:	B
0	-45	1.15655	1.12788	1.12426	1.10794			Z Column:	C			Z Column:	D			Z Column:	E			Z Column:	F
15	-45	1.15823	1.07298	1.15057	1.08652
								Data Counts				Data Counts				Data Counts				Data Counts
								Active Data:	15			Active Data:	15			Active Data:	15			Active Data:	15
								Original Data:	15			Original Data:	15			Original Data:	15			Original Data:	15
								Excluded Data:	0			Excluded Data:	0			Excluded Data:	0			Excluded Data:	0
								Deleted Duplicates:	0			Deleted Duplicates:	0			Deleted Duplicates:	0			Deleted Duplicates:	0
								Retained Duplicates:	0			Retained Duplicates:	0			Retained Duplicates:	0			Retained Duplicates:	0
								Artificial Data:	0			Artificial Data:	0			Artificial Data:	0			Artificial Data:	0
								Superseded Data:	0			Superseded Data:	0			Superseded Data:	0			Superseded Data:	0
								Exclusion Filtering				Exclusion Filtering				Exclusion Filtering				Exclusion Filtering
								Exclusion Filter String:	Not In Use			Exclusion Filter String:	Not In Use			Exclusion Filter String:	Not In Use			Exclusion Filter String:	Not In Use
								Duplicate Filtering				Duplicate Filtering				Duplicate Filtering				Duplicate Filtering
								Duplicate Points to Keep:	First			Duplicate Points to Keep:	First			Duplicate Points to Keep:	First			Duplicate Points to Keep:	First
								X Duplicate Tolerance:	3.5e-06			X Duplicate Tolerance:	3.5e-06			X Duplicate Tolerance:	3.5e-06			X Duplicate Tolerance:	3.5e-06
								Y Duplicate Tolerance:	4.7e-06			Y Duplicate Tolerance:	4.7e-06			Y Duplicate Tolerance:	4.7e-06			Y Duplicate Tolerance:	4.7e-06
								No duplicate data were found.				No duplicate data were found.				No duplicate data were found.				No duplicate data were found.
								Breakline Filtering				Breakline Filtering				Breakline Filtering				Breakline Filtering
								Breakline Filtering:	Not In Use			Breakline Filtering:	Not In Use			Breakline Filtering:	Not In Use			Breakline Filtering:	Not In Use
								Data Counts				Data Counts				Data Counts				Data Counts
								Active Data:	15			Active Data:	15			Active Data:	15			Active Data:	15
								Univariate Statistics				Univariate Statistics				Univariate Statistics				Univariate Statistics
								————————————————————————————————————————————				————————————————————————————————————————————				————————————————————————————————————————————				————————————————————————————————————————————
									X	Y	Z		X	Y	Z		X	Y	Z		X	Y	Z
								————————————————————————————————————————————				————————————————————————————————————————————				————————————————————————————————————————————				————————————————————————————————————————————
								Count:	15	15	15	Count:	15	15	15	Count:	15	15	15	Count:	15	15	15
								1%%-tile:	-15	-45	1.02082	1%%-tile:	-15	-45	1.07102	1%%-tile:	-15	-45	1.12426	1%%-tile:	-15	-45	1.08652
								5%%-tile:	-15	-45	1.02082	5%%-tile:	-15	-45	1.07102	5%%-tile:	-15	-45	1.12426	5%%-tile:	-15	-45	1.08652
								10%%-tile:	-15	-45	1.05346	10%%-tile:	-15	-45	1.07298	10%%-tile:	-15	-45	1.1501	10%%-tile:	-15	-45	1.08962
								25%%-tile:	-15	-35	1.11163	25%%-tile:	-15	-35	1.11333	25%%-tile:	-15	-35	1.15352	25%%-tile:	-15	-35	1.15423
								50%%-tile:	0	-25	1.15908	50%%-tile:	0	-25	1.17632	50%%-tile:	0	-25	1.23611	50%%-tile:	0	-25	1.25047
								75%%-tile:	15	-15	1.22559	75%%-tile:	15	-15	1.21096	75%%-tile:	15	-15	1.27069	75%%-tile:	15	-15	1.30856
								90%%-tile:	15	-5	1.23743	90%%-tile:	15	-5	1.23518	90%%-tile:	15	-5	1.2798	90%%-tile:	15	-5	1.32191
								95%%-tile:	15	-5	1.24398	95%%-tile:	15	-5	1.23664	95%%-tile:	15	-5	1.29122	95%%-tile:	15	-5	1.33952
								99%%-tile:	15	-5	1.24398	99%%-tile:	15	-5	1.23664	99%%-tile:	15	-5	1.29122	99%%-tile:	15	-5	1.33952
								Minimum:	-15	-45	1.02082	Minimum:	-15	-45	1.07102	Minimum:	-15	-45	1.12426	Minimum:	-15	-45	1.08652
								Maximum:	15	-5	1.25071	Maximum:	15	-5	1.27541	Maximum:	15	-5	1.33805	Maximum:	15	-5	1.39174
								Mean:	0	-25	1.16409	Mean:	0	-25	1.16982	Mean:	0	-25	1.22427	Mean:	0	-25	1.23283
								Median:	0	-25	1.15908	Median:	0	-25	1.17632	Median:	0	-25	1.23611	Median:	0	-25	1.25047
								Geometric Mean:	N/A	N/A	1.16188	Geometric Mean:	N/A	N/A	1.16814	Geometric Mean:	N/A	N/A	1.22274	Geometric Mean:	N/A	N/A	1.22931
								Harmonic Mean:	N/A	N/A	1.15962	Harmonic Mean:	N/A	N/A	1.16645	Harmonic Mean:	N/A	N/A	1.22122	Harmonic Mean:	N/A	N/A	1.22575
								Root Mean Square:	12.2474	28.7228	1.16623	Root Mean Square:	12.2474	28.7228	1.17149	Root Mean Square:	12.2474	28.7228	1.22579	Root Mean Square:	12.2474	28.7228	1.2363
								Trim Mean (10%%):	N/A	N/A	N/A	Trim Mean (10%%):	N/A	N/A	N/A	Trim Mean (10%%):	N/A	N/A	N/A	Trim Mean (10%%):	N/A	N/A	N/A
								Interquartile Mean:	-1.875	-26.25	1.16906	Interquartile Mean:	-1.875	-26.25	1.16593	Interquartile Mean:	-1.875	-26.25	1.21911	Interquartile Mean:	-1.875	-26.25	1.2306
								Midrange:	0	-25	1.13576	Midrange:	0	-25	1.17321	Midrange:	0	-25	1.23115	Midrange:	0	-25	1.23913
								Winsorized Mean:	0	-25	1.16494	Winsorized Mean:	0	-25	1.16717	Winsorized Mean:	0	-25	1.22135	Winsorized Mean:	0	-25	1.22721
								TriMean:	0	-25	1.16384	TriMean:	0	-25	1.16923	TriMean:	0	-25	1.22411	TriMean:	0	-25	1.24093
								Variance:	160.714	214.286	0.0053648	Variance:	160.714	214.286	0.00418391	Variance:	160.714	214.286	0.00399136	Variance:	160.714	214.286	0.00918755
								Standard Deviation:	12.6773	14.6385	0.0732448	Standard Deviation:	12.6773	14.6385	0.0646832	Standard Deviation:	12.6773	14.6385	0.0631772	Standard Deviation:	12.6773	14.6385	0.0958517
								Interquartile Range:	30	20	0.113963	Interquartile Range:	30	20	0.0976282	Interquartile Range:	30	20	0.117172	Interquartile Range:	30	20	0.15433
								Range:	30	40	0.229892	Range:	30	40	0.204381	Range:	30	40	0.213788	Range:	30	40	0.305223
								Mean Difference:	14.2857	17.1429	0.0836542	Mean Difference:	14.2857	17.1429	0.0765849	Mean Difference:	14.2857	17.1429	0.0743436	Mean Difference:	14.2857	17.1429	0.113074
								Median Abs. Deviation:	15	10	0.0665122	Median Abs. Deviation:	15	10	0.0586214	Median Abs. Deviation:	15	10	0.044574	Median Abs. Deviation:	15	10	0.0714418
								Average Abs. Deviation:	10	12	0.0560201	Average Abs. Deviation:	10	12	0.054071	Average Abs. Deviation:	10	12	0.0520576	Average Abs. Deviation:	10	12	0.0783426
								Quartile Dispersion:	N/A	N/A	0.0487601	Quartile Dispersion:	N/A	N/A	0.0420034	Quartile Dispersion:	N/A	N/A	0.0483342	Quartile Dispersion:	N/A	N/A	0.062665
								Relative Mean Diff.:	N/A	N/A	0.0718626	Relative Mean Diff.:	N/A	N/A	0.0654674	Relative Mean Diff.:	N/A	N/A	0.060725	Relative Mean Diff.:	N/A	N/A	0.0917191
								Standard Error:	3.27327	3.77964	0.0189117	Standard Error:	3.27327	3.77964	0.0167011	Standard Error:	3.27327	3.77964	0.0163123	Standard Error:	3.27327	3.77964	0.0247488
								Coef. of Variation:	N/A	N/A	0.0629205	Coef. of Variation:	N/A	N/A	0.0552933	Coef. of Variation:	N/A	N/A	0.0516041	Coef. of Variation:	N/A	N/A	0.0777493
								Skewness:	0	0	-0.495362	Skewness:	0	0	-0.104213	Skewness:	0	0	-0.0135589	Skewness:	0	0	-0.148362
								Kurtosis:	1.30667	1.48089	1.90299	Kurtosis:	1.30667	1.48089	1.58677	Kurtosis:	1.30667	1.48089	1.67645	Kurtosis:	1.30667	1.48089	1.65094
								Sum:	0	-375	17.4613	Sum:	0	-375	17.5473	Sum:	0	-375	18.364	Sum:	0	-375	18.4925
								Sum Absolute:	150	375	17.4613	Sum Absolute:	150	375	17.5473	Sum Absolute:	150	375	18.364	Sum Absolute:	150	375	18.4925
								Sum Squares:	2250	12375	20.4015	Sum Squares:	2250	12375	20.5857	Sum Squares:	2250	12375	22.5384	Sum Squares:	2250	12375	22.9267
								Mean Square:	150	825	1.3601	Mean Square:	150	825	1.37238	Mean Square:	150	825	1.50256	Mean Square:	150	825	1.52845
								————————————————————————————————————————————				————————————————————————————————————————————				————————————————————————————————————————————				————————————————————————————————————————————
								Inter-Variable Covariance				Inter-Variable Covariance				Inter-Variable Covariance				Inter-Variable Covariance
								————————————————————————————————				————————————————————————————————				————————————————————————————————				————————————————————————————————
									X	Y	Z		X	Y	Z		X	Y	Z		X	Y	Z
								————————————————————————————————				————————————————————————————————				————————————————————————————————				————————————————————————————————
								X:	160.714	0	0.0338778	X:	160.714	0	-0.00315545	X:	160.714	0	-0.115744	X:	160.714	0	-0.0947921
								Y:	0	214.286	-0.676113	Y:	0	214.286	0.185965	Y:	0	214.286	0.492661	Y:	0	214.286	1.24288
								Z:	0.0338778	-0.676113	0.0053648	Z:	-0.00315545	0.185965	0.00418391	Z:	-0.115744	0.492661	0.00399136	Z:	-0.0947921	1.24288	0.00918755
								————————————————————————————————				————————————————————————————————				————————————————————————————————				————————————————————————————————
								Inter-Variable Correlation				Inter-Variable Correlation				Inter-Variable Correlation				Inter-Variable Correlation
								————————————————————————————————				————————————————————————————————				————————————————————————————————				————————————————————————————————
									X	Y	Z		X	Y	Z		X	Y	Z		X	Y	Z
								————————————————————————————————				————————————————————————————————				————————————————————————————————				————————————————————————————————
								X:	1	0	0.036	X:	1	0	-0.004	X:	1	0	-0.145	X:	1	0	-0.078
								Y:	0	1	-0.631	Y:	0	1	0.196	Y:	0	1	0.533	Y:	0	1	0.886
								Z:	0.036	-0.631	1	Z:	-0.004	0.196	1	Z:	-0.145	0.533	1	Z:	-0.078	0.886	1
								————————————————————————————————				————————————————————————————————				————————————————————————————————				————————————————————————————————
								Inter-Variable Rank Correlation				Inter-Variable Rank Correlation				Inter-Variable Rank Correlation				Inter-Variable Rank Correlation
								————————————————————————————————				————————————————————————————————				————————————————————————————————				————————————————————————————————
									X	Y	Z		X	Y	Z		X	Y	Z		X	Y	Z
								————————————————————————————————				————————————————————————————————				————————————————————————————————				————————————————————————————————
								X:	1	0	-0.094	X:	1	0	0	X:	1	0	-0.132	X:	1	0	-0.019
								Y:	0	1	-0.567	Y:	0	1	0.196	Y:	0	1	0.578	Y:	0	1	0.873
								Z:	-0.094	-0.567	1	Z:	0	0.196	1	Z:	-0.132	0.578	1	Z:	-0.019	0.873	1
								————————————————————————————————				————————————————————————————————				————————————————————————————————				————————————————————————————————
								Principal Component Analysis				Principal Component Analysis				Principal Component Analysis				Principal Component Analysis
								————————————————————————————————————————				————————————————————————————————————————				————————————————————————————————————————				————————————————————————————————————————
									PC1	PC2	PC3		PC1	PC2	PC3		PC1	PC2	PC3		PC1	PC2	PC3
								————————————————————————————————————————				————————————————————————————————————————				————————————————————————————————————————				————————————————————————————————————————
								X:	1	1	-0.000210798	X:	1	1	1.96344e-05	X:	1	1	0.000720193	X:	1	1	0.000589815
								Y:	2.66035e-06	2.66035e-06	0.00315523	Y:	6.81577e-08	6.81577e-08	-0.000867854	Y:	6.62304e-06	6.62304e-06	-0.00229911	Y:	1.36824e-05	1.36824e-05	-0.00580007
								Z:	0.000210791	0.000210791	0.00315523	Z:	-1.96343e-05	-1.96343e-05	-0.000867854	Z:	-0.00072018	-0.00072018	-0.00229911	Z:	-0.000589745	-0.000589745	-0.00580007
								Lambda:	214.288	160.714	0.00322436	Lambda:	214.286	160.714	0.00402246	Lambda:	214.287	160.714	0.00277531	Lambda:	214.293	160.714	0.00192271
								————————————————————————————————————————				————————————————————————————————————————				————————————————————————————————————————				————————————————————————————————————————
								Planar Regression: Z = AX+BY+C				Planar Regression: Z = AX+BY+C				Planar Regression: Z = AX+BY+C				Planar Regression: Z = AX+BY+C
								Fitted Parameters				Fitted Parameters				Fitted Parameters				Fitted Parameters
								————————————————————————————————————————				————————————————————————————————————————				————————————————————————————————————————				————————————————————————————————————————
									A	B	C		A	B	C		A	B	C		A	B	C
								————————————————————————————————————————				————————————————————————————————————————				————————————————————————————————————————				————————————————————————————————————————
								Parameter Value:	0.000210795	-0.00315519	1.08521	Parameter Value:	-1.96339e-05	0.000867838	1.19151	Parameter Value:	-0.000720183	0.00229909	1.28174	Parameter Value:	-0.000589817	0.00580012	1.37783
								Standard Error:	0.00129302	0.00111979	0.0321635	Standard Error:	0.0014442	0.00125072	0.0359241	Standard Error:	0.00119961	0.00103889	0.0298399	Standard Error:	0.000998496	0.000864723	0.0248373
								————————————————————————————————————————				————————————————————————————————————————				————————————————————————————————————————				————————————————————————————————————————
								Inter-Parameter Correlations				Inter-Parameter Correlations				Inter-Parameter Correlations				Inter-Parameter Correlations
								————————————————————————————				————————————————————————————				————————————————————————————				————————————————————————————
									A	B	C		A	B	C		A	B	C		A	B	C
								————————————————————————————				————————————————————————————				————————————————————————————				————————————————————————————
								A:	1	0	0	A:	1	0	0	A:	1	0	0	A:	1	0	0
								B:	0	1	0.87	B:	0	1	0.87	B:	0	1	0.87	B:	0	1	0.87
								C:	0	0.87	1	C:	0	0.87	1	C:	0	0.87	1	C:	0	0.87	1
								————————————————————————————				————————————————————————————				————————————————————————————				————————————————————————————
								ANOVA Table				ANOVA Table				ANOVA Table				ANOVA Table
								————————————————————————————————————————————————————				————————————————————————————————————————————————————				————————————————————————————————————————————————————				————————————————————————————————————————————————————
								Source	df	Sum of Squares	Mean Square	Source	df	Sum of Squares	Mean Square	Source	df	Sum of Squares	Mean Square	Source	df	Sum of Squares	Mean Square	F
								————————————————————————————————————————————————————				————————————————————————————————————————————————————				————————————————————————————————————————————————————				————————————————————————————————————————————————————
								Regression:	2	0.0299657	0.0149829	Regression:	2	0.0022603	0.00113015	Regression:	2	0.0170244	0.0085122	Regression:	2	0.101707	0.0508535	22.6697
								Residual:	12	0.0451415	0.00376179	Residual:	12	0.0563145	0.00469287	Residual:	12	0.0388546	0.00323788	Residual:	12	0.0269188	0.00224324
								Total:	14	0.0751073		Total:	14	0.0585747		Total:	14	0.055879		Total:	14	0.128626
								————————————————————————————————————————————————————				————————————————————————————————————————————————————				————————————————————————————————————————————————————				————————————————————————————————————————————————————
								Coefficient of Multiple Determination (R^2):	0.398972			Coefficient of Multiple Determination (R^2):	0.0385882			Coefficient of Multiple Determination (R^2):	0.304665			Coefficient of Multiple Determination (R^2):	0.79072
								Nearest Neighbor Statistics				Nearest Neighbor Statistics				Nearest Neighbor Statistics				Nearest Neighbor Statistics
								—————————————————————————————————				—————————————————————————————————				—————————————————————————————————				—————————————————————————————————
									Separation	|Delta Z|			Separation	|Delta Z|			Separation	|Delta Z|			Separation	|Delta Z|
								—————————————————————————————————				—————————————————————————————————				—————————————————————————————————				—————————————————————————————————
								1%%-tile:	10	0.0118434		1%%-tile:	10	0.023981		1%%-tile:	10	0.00644273		1%%-tile:	10	0.0176071
								5%%-tile:	10	0.0118434		5%%-tile:	10	0.023981		5%%-tile:	10	0.00644273		5%%-tile:	10	0.0176071
								10%%-tile:	10	0.0118434		10%%-tile:	10	0.023981		10%%-tile:	10	0.00644273		10%%-tile:	10	0.0176071
								25%%-tile:	10	0.01974		25%%-tile:	10	0.0273236		25%%-tile:	10	0.0296218		25%%-tile:	10	0.0447337
								50%%-tile:	10	0.0581682		50%%-tile:	10	0.0402263		50%%-tile:	10	0.0414385		50%%-tile:	10	0.0580846
								75%%-tile:	10	0.0795716		75%%-tile:	10	0.069737		75%%-tile:	10	0.0436932		75%%-tile:	10	0.0741653
								90%%-tile:	10	0.0874286		90%%-tile:	10	0.115593		90%%-tile:	10	0.081434		90%%-tile:	10	0.0813575
								95%%-tile:	10	0.0913777		95%%-tile:	10	0.12331		95%%-tile:	10	0.0825882		95%%-tile:	10	0.0846374
								99%%-tile:	10	0.0913777		99%%-tile:	10	0.12331		99%%-tile:	10	0.0825882		99%%-tile:	10	0.0846374
								Minimum:	10	0.0118434		Minimum:	10	0.023981		Minimum:	10	0.00644273		Minimum:	10	0.0176071
								Maximum:	10	0.138262		Maximum:	10	0.204381		Maximum:	10	0.0990936		Maximum:	10	0.120897
								Mean:	10	0.0560881		Mean:	10	0.0631882		Mean:	10	0.0440652		Mean:	10	0.0595005
								Median:	10	0.0581682		Median:	10	0.0402263		Median:	10	0.0414385		Median:	10	0.0580846
								Geometric Mean:	10	0.0426912		Geometric Mean:	10	0.0502075		Geometric Mean:	10	0.0352375		Geometric Mean:	10	0.053219
								Harmonic Mean:	10	0.0310002		Harmonic Mean:	10	0.0421842		Harmonic Mean:	10	0.0243697		Harmonic Mean:	10	0.0457354
								Root Mean Square:	10	0.0668304		Root Mean Square:	10	0.0798184		Root Mean Square:	10	0.0508806		Root Mean Square:	10	0.0647135
								Trim Mean (10%%):	N/A	N/A		Trim Mean (10%%):	N/A	N/A		Trim Mean (10%%):	N/A	N/A		Trim Mean (10%%):	N/A	N/A
								Interquartile Mean:	10	0.0494216		Interquartile Mean:	10	0.0433278		Interquartile Mean:	10	0.0373632		Interquartile Mean:	10	0.0564379
								Midrange:	10	0.0750529		Midrange:	10	0.114181		Midrange:	10	0.0527681		Midrange:	10	0.0692519
								Winsorized Mean:	10	0.0524359		Winsorized Mean:	10	0.0567546		Winsorized Mean:	10	0.042811		Winsorized Mean:	10	0.0566459
								TriMean:	10	0.053912		TriMean:	10	0.0443783		TriMean:	10	0.039048		TriMean:	10	0.058767
								Variance:	0	0.00141475		Variance:	0	0.00254809		Variance:	0	0.000693311		Variance:	0	0.000693778
								Standard Deviation:	N/A	0.0376131		Standard Deviation:	N/A	0.0504786		Standard Deviation:	N/A	0.0263308		Standard Deviation:	N/A	0.0263397
								Interquartile Range:	0	0.0598316		Interquartile Range:	0	0.0424135		Interquartile Range:	0	0.0140714		Interquartile Range:	0	0.0294316
								Range:	0	0.126419		Range:	0	0.1804		Range:	0	0.0926508		Range:	0	0.103289
								Mean Difference:	0	0.042847		Mean Difference:	0	0.0513282		Mean Difference:	0	0.0293041		Mean Difference:	0	0.0296672
								Median Abs. Deviation:	0	0.0332096		Median Abs. Deviation:	0	0.0162453		Median Abs. Deviation:	0	0.0118167		Median Abs. Deviation:	0	0.0133509
								Average Abs. Deviation:	0	0.0305033		Average Abs. Deviation:	0	0.0329445		Average Abs. Deviation:	0	0.0184827		Average Abs. Deviation:	0	0.0193098
								Quartile Dispersion:	0	0.602463		Quartile Dispersion:	0	0.436979		Quartile Dispersion:	0	0.19193		Quartile Dispersion:	0	0.247535
								Relative Mean Diff.:	0	0.763923		Relative Mean Diff.:	0	0.812306		Relative Mean Diff.:	0	0.665015		Relative Mean Diff.:	0	0.498603
								Standard Error:	N/A	0.00971166		Standard Error:	N/A	0.0130335		Standard Error:	N/A	0.00679858		Standard Error:	N/A	0.00680087
								Coef. of Variation:	N/A	0.670608		Coef. of Variation:	N/A	0.798861		Coef. of Variation:	N/A	0.597541		Coef. of Variation:	N/A	0.442679
								Skewness:	N/A	0.394566		Skewness:	N/A	1.49311		Skewness:	N/A	0.586944		Skewness:	N/A	0.389093
								Kurtosis:	N/A	2.11527		Kurtosis:	N/A	4.40239		Kurtosis:	N/A	2.42667		Kurtosis:	N/A	2.94367
								Sum:	150	0.841321		Sum:	150	0.947823		Sum:	150	0.660979		Sum:	150	0.892508
								Sum Absolute:	150	0.841321		Sum Absolute:	150	0.947823		Sum Absolute:	150	0.660979		Sum Absolute:	150	0.892508
								Sum Squares:	1500	0.0669945		Sum Squares:	1500	0.0955646		Sum Squares:	1500	0.0388325		Sum Squares:	1500	0.0628176
								Mean Square:	100	0.0044663		Mean Square:	100	0.00637097		Mean Square:	100	0.00258884		Mean Square:	100	0.00418784
								—————————————————————————————————				—————————————————————————————————				—————————————————————————————————				—————————————————————————————————
								Complete Spatial Randomness				Complete Spatial Randomness				Complete Spatial Randomness				Complete Spatial Randomness
								Lambda:	0.0125			Lambda:	0.0125			Lambda:	0.0125			Lambda:	0.0125
								Clark and Evans:	2.23607			Clark and Evans:	2.23607			Clark and Evans:	2.23607			Clark and Evans:	2.23607
								Skellam:	117.81			Skellam:	117.81			Skellam:	117.81			Skellam:	117.81
								Gridding Rules				Gridding Rules				Gridding Rules				Gridding Rules
								Gridding Method:	Kriging			Gridding Method:	Kriging			Gridding Method:	Kriging			Gridding Method:	Kriging
								Kriging Type:	Point			Kriging Type:	Point			Kriging Type:	Point			Kriging Type:	Point
								Polynomial Drift Order:	0			Polynomial Drift Order:	0			Polynomial Drift Order:	0			Polynomial Drift Order:	0
								Kriging std. deviation grid:	no			Kriging std. deviation grid:	no			Kriging std. deviation grid:	no			Kriging std. deviation grid:	no
								Semi-Variogram Model				Semi-Variogram Model				Semi-Variogram Model				Semi-Variogram Model
								Component Type:	Linear			Component Type:	Linear			Component Type:	Linear			Component Type:	Linear
								Anisotropy Angle:	0			Anisotropy Angle:	0			Anisotropy Angle:	0			Anisotropy Angle:	0
								Anisotropy Ratio:	1			Anisotropy Ratio:	1			Anisotropy Ratio:	1			Anisotropy Ratio:	1
								Variogram Slope:	1			Variogram Slope:	1			Variogram Slope:	1			Variogram Slope:	1
								Search Parameters				Search Parameters				Search Parameters				Search Parameters
								No Search (use all data):	true			No Search (use all data):	true			No Search (use all data):	true			No Search (use all data):	true
								Output Grid				Output Grid				Output Grid				Output Grid
								Grid File Name:	H:\Artigo 3 raizes de Milho\Densidade do solo Março 2014\Densidade do solo Março 2014ESC.grd			Grid File Name:	H:\Artigo 3 raizes de Milho\Densidade do solo Março 2014\Densidade do solo Março 2014SPD.grd			Grid File Name:	H:\Artigo 3 raizes de Milho\Densidade do solo Março 2014\Densidade do solo Março 2014C4.grd			Grid File Name:	H:\Artigo 3 raizes de Milho\Densidade do solo Março 2014\Densidade do solo Março 2014C8.grd
								Grid Size:	100 rows x 75 columns			Grid Size:	100 rows x 75 columns			Grid Size:	100 rows x 75 columns			Grid Size:	100 rows x 75 columns
								Total Nodes:	7500			Total Nodes:	7500			Total Nodes:	7500			Total Nodes:	7500
								Filled Nodes:	7500			Filled Nodes:	7500			Filled Nodes:	7500			Filled Nodes:	7500
								Blanked Nodes:	0			Blanked Nodes:	0			Blanked Nodes:	0			Blanked Nodes:	0
								Blank Value:	1.70141e+38			Blank Value:	1.70141e+38			Blank Value:	1.70141e+38			Blank Value:	1.70141e+38
								Grid Geometry				Grid Geometry				Grid Geometry				Grid Geometry
								X Minimum:	-22.5			X Minimum:	-22.5			X Minimum:	-22.5			X Minimum:	-22.5
								X Maximum:	22.5			X Maximum:	22.5			X Maximum:	22.5			X Maximum:	22.5
								X Spacing:	0.608108			X Spacing:	0.608108			X Spacing:	0.608108			X Spacing:	0.608108
								Y Minimum:	-50			Y Minimum:	-50			Y Minimum:	-50			Y Minimum:	-50
								Y Maximum:	0			Y Maximum:	0			Y Maximum:	0			Y Maximum:	0
								Y Spacing:	0.505051			Y Spacing:	0.505051			Y Spacing:	0.505051			Y Spacing:	0.505051
								Univariate Grid Statistics				Univariate Grid Statistics				Univariate Grid Statistics				Univariate Grid Statistics
								——————————————————————————————				——————————————————————————————				——————————————————————————————				——————————————————————————————
									Z				Z				Z				Z
								——————————————————————————————				——————————————————————————————				——————————————————————————————				——————————————————————————————
								Count:	7500			Count:	7500			Count:	7500			Count:	7500
								1%%-tile:	1.02018			1%%-tile:	1.07195			1%%-tile:	1.12286			1%%-tile:	1.0819
								5%%-tile:	1.04144			5%%-tile:	1.08543			5%%-tile:	1.13722			5%%-tile:	1.08968
								10%%-tile:	1.06037			10%%-tile:	1.09661			10%%-tile:	1.14865			10%%-tile:	1.10174
								25%%-tile:	1.1175			25%%-tile:	1.12498			25%%-tile:	1.17924			25%%-tile:	1.15215
								50%%-tile:	1.17397			50%%-tile:	1.17143			50%%-tile:	1.23521			50%%-tile:	1.25502
								75%%-tile:	1.21626			75%%-tile:	1.21251			75%%-tile:	1.26603			75%%-tile:	1.30172
								90%%-tile:	1.23502			90%%-tile:	1.22993			90%%-tile:	1.28212			90%%-tile:	1.32633
								95%%-tile:	1.23992			95%%-tile:	1.2386			95%%-tile:	1.28927			95%%-tile:	1.34882
								99%%-tile:	1.24491			99%%-tile:	1.25805			99%%-tile:	1.31238			99%%-tile:	1.37937
								Minimum:	1.01403			Minimum:	1.06451			Minimum:	1.11845			Minimum:	1.07769
								Maximum:	1.25011			Maximum:	1.27345			Maximum:	1.33539			Maximum:	1.39086
								Mean:	1.16237			Mean:	1.16773			Mean:	1.22367			Mean:	1.23249
								Median:	1.17398			Median:	1.17145			Median:	1.23523			Median:	1.25504
								Geometric Mean:	1.16059			Geometric Mean:	1.16663			Geometric Mean:	1.22261			Geometric Mean:	1.22946
								Harmonic Mean:	1.15877			Harmonic Mean:	1.16552			Harmonic Mean:	1.22155			Harmonic Mean:	1.22638
								Root Mean Square:	1.1641			Root Mean Square:	1.16883			Root Mean Square:	1.22471			Root Mean Square:	1.23546
								Trim Mean (10%%):	1.16529			Trim Mean (10%%):	1.1682			Trim Mean (10%%):	1.22453			Trim Mean (10%%):	1.23302
								Interquartile Mean:	1.17472			Interquartile Mean:	1.17051			Interquartile Mean:	1.23017			Interquartile Mean:	1.24466
								Midrange:	1.13207			Midrange:	1.16898			Midrange:	1.22692			Midrange:	1.23428
								Winsorized Mean:	1.16389			Winsorized Mean:	1.16776			Winsorized Mean:	1.22372			Winsorized Mean:	1.23106
								TriMean:	1.17042			TriMean:	1.17009			TriMean:	1.22892			TriMean:	1.24098
								Variance:	0.00402546			Variance:	0.00256427			Variance:	0.00255714			Variance:	0.00732977
								Standard Deviation:	0.0634465			Standard Deviation:	0.0506386			Standard Deviation:	0.0505682			Standard Deviation:	0.0856141
								Interquartile Range:	0.098765			Interquartile Range:	0.0875272			Interquartile Range:	0.0867902			Interquartile Range:	0.149566
								Range:	0.236081			Range:	0.20894			Range:	0.216937			Range:	0.313171
								Mean Difference:	0.0711787			Mean Difference:	0.058283			Mean Difference:	0.0576884			Mean Difference:	0.0974561
								Median Abs. Deviation:	0.0454348			Median Abs. Deviation:	0.0434542			Median Abs. Deviation:	0.0377662			Median Abs. Deviation:	0.0625136
								Average Abs. Deviation:	0.0516246			Average Abs. Deviation:	0.0440469			Average Abs. Deviation:	0.0431846			Average Abs. Deviation:	0.0731081
								Quartile Dispersion:	0.0423201			Quartile Dispersion:	0.0374451			Quartile Dispersion:	0.035493			Quartile Dispersion:	0.0609514
								Relative Mean Diff.:	0.0612359			Relative Mean Diff.:	0.0499112			Relative Mean Diff.:	0.0471438			Relative Mean Diff.:	0.0790727
								Standard Error:	0.000732617			Standard Error:	0.000584725			Standard Error:	0.000583911			Standard Error:	0.000988586
								Coef. of Variation:	0.0545838			Coef. of Variation:	0.0433649			Coef. of Variation:	0.041325			Coef. of Variation:	0.0694645
								Skewness:	-0.643088			Skewness:	-0.154743			Skewness:	-0.335518			Skewness:	-0.322828
								Kurtosis:	2.29776			Kurtosis:	1.86282			Kurtosis:	1.94676			Kurtosis:	1.83525
								Sum:	8717.76			Sum:	8758			Sum:	9177.52			Sum:	9243.65
								Sum Absolute:	8717.76			Sum Absolute:	8758			Sum Absolute:	9177.52			Sum Absolute:	9243.65
								Sum Squares:	10163.4			Sum Squares:	10246.2			Sum Squares:	11249.4			Sum Squares:	11447.6
								Mean Square:	1.35512			Mean Square:	1.36617			Mean Square:	1.49992			Mean Square:	1.52635
								——————————————————————————————				——————————————————————————————				——————————————————————————————				——————————————————————————————

## Sheet: Figure 3 and table 2
FIGURE 3 | Water retention curve (A, C, E) and cumulated frequency and distribution of pore size (B, D, F) in the 0–10 cm (A, B), 10–20 cm (C, D), and 20–30 cm (E, F) layers due to the compaction level of a Rhodic Eutrudox. MTC: minimum tillage with chiseling; NT: no-till system; NTC4: no-tillage with four passes of a tractor; NTC8: no-tillage with eight passes of a harvester. Bars indicate the S…														TABLE 2 | Van Genuchten’s parameter, hydraulic conductivity, bulk density, and degree of compaction of a Rhodic Eutrudox for four compaction levels: minimum tillage with chiseling (MTC), no-tillage (NT), no-tillage with four tractor passes (NTC4), and no-tillage with eight harvester passes (NTC8).
		Soil water content measured (m3 m-3)												Input file name: CRA_Compc_abril_2013_S2.dat(path: e:\Meus Documentos\PhD Student at JHI\Modelagem Uv e RP Swap\Modelagem Compactação\).
		Matric potential (|cm|)												Model: van Genuchten (1980)
Treatment	Soil Layer (cm)	1	30	60	100	330	1000	5000	40000	60000				m: Dependent (Mualem, 1976) (m=1-1/n)
MTC	0_10	0.584324	0.421435	0.381014	0.366783	0.328431	0.318111	0.285277	0.216396	0.207713				Residual Soil Water Content: Regression value (restriction to positive value)
MTC	10_20	0.553799	0.462012	0.431172	0.412229	0.379787	0.352193	0.325085	0.264565	0.254568				Saturated Soil Water Content: Extrapolated value < 1 (Jong-van-Lier and Dourado-Neto, 1993)
MTC	20_30	0.526269	0.485797	0.466281	0.447156	0.410131	0.41054	0.37106	0.292364	0.284297				Parameters:
NT	0_10	0.555211	0.477786	0.445084	0.415514	0.403364	0.381474	0.335839	0.259912	0.249483				Alpha: 0.1927
NT	10_20	0.537158	0.474039	0.455977	0.43278	0.416913	0.3886	0.357807	0.287765	0.276891				m: 0.2121
NT	20_30	0.539773	0.483474	0.466761	0.438805	0.420922	0.39987	0.380194	0.292324	0.284259				n: 1.2691
NTC4	0_10	0.508791	0.49191	0.475321	0.466786	0.412164	0.425663	0.368479	0.290338	0.278689				Residual soil moisture: 0.198
NTC4	10_20	0.510461	0.476991	0.464675	0.467045	0.422783	0.415937	0.387086	0.305019	0.293493				Saturated soil moisture: 0.585
NTC4	20_30	0.524291	0.492755	0.478933	0.485626	0.43485	0.432565	0.389058	0.30483	0.29642				Adjust coefficient: 0.975
NTC8	0_10	0.499373	0.490616	0.486343	0.496705	0.447407	0.441819	0.402528	0.298488	0.286511				Case: Iteractive method of Newton-Raphson
NTC8	10_20	0.505971	0.482692	0.477138	0.473327	0.43586	0.43097	0.404374	0.312358	0.300555				Adjust coefficient: 0.975
NTC8	20_30	0.526453	0.496212	0.486757	0.468403	0.442219	0.437708	0.417638	0.307811	0.299319				AIC: Akaike Information Criterion (Hippel, 1981): -10.9933
														Curve: 1
	Soil water content adjusted (m3 m-3)													___________________________________
Depth	0-10 cm				10-20 cm				20-30 cm					Matric Soil Water Content
Treatment / Matric Potential (|cm|)	MTC	NT	NTC4	NTC8	MTC	NT	NTC4	NTC8	MTC	NT	NTC4	NTC8		Potential _______________________
1	0.5758	0.552	0.5077	0.499	0.5484	0.5247	0.5095	0.5048	0.5248	0.5369	0.5236	0.5255		Measured Estimated
1.02329	0.5755	0.5519	0.5077	0.499	0.5483	0.5247	0.5094	0.5048	0.5248	0.5369	0.5236	0.5255		___________________________________
1.04713	0.5752	0.5518	0.5077	0.499	0.5481	0.5246	0.5094	0.5048	0.5247	0.5368	0.5236	0.5255		0 0.584
1.07152	0.575	0.5517	0.5077	0.499	0.548	0.5245	0.5094	0.5048	0.5247	0.5367	0.5236	0.5255		30 0.421
1.09648	0.5747	0.5517	0.5077	0.499	0.5479	0.5245	0.5094	0.5048	0.5247	0.5367	0.5235	0.5255		60 0.381
1.12202	0.5744	0.5516	0.5077	0.499	0.5478	0.5244	0.5094	0.5048	0.5246	0.5366	0.5235	0.5255		100 0.366
1.14815	0.5741	0.5515	0.5077	0.499	0.5476	0.5243	0.5094	0.5048	0.5246	0.5366	0.5235	0.5254		330 0.328
1.1749	0.5738	0.5514	0.5077	0.499	0.5475	0.5243	0.5093	0.5048	0.5246	0.5365	0.5235	0.5254		1000 0.318
1.20226	0.5735	0.5513	0.5077	0.499	0.5473	0.5242	0.5093	0.5048	0.5245	0.5364	0.5235	0.5254		5000 0.285
1.23027	0.5732	0.5512	0.5077	0.499	0.5472	0.5241	0.5093	0.5047	0.5245	0.5364	0.5235	0.5254		40000 0.216
1.25893	0.5729	0.5511	0.5077	0.499	0.547	0.524	0.5093	0.5047	0.5244	0.5363	0.5235	0.5254		60000 0.207
1.28825	0.5726	0.551	0.5076	0.499	0.5469	0.524	0.5093	0.5047	0.5244	0.5362	0.5235	0.5254		___________________________________
1.31826	0.5722	0.5509	0.5076	0.499	0.5467	0.5239	0.5092	0.5047	0.5244	0.5362	0.5234	0.5254
1.34896	0.5719	0.5508	0.5076	0.499	0.5466	0.5238	0.5092	0.5047	0.5243	0.5361	0.5234	0.5253		ANOVA
1.38038	0.5715	0.5507	0.5076	0.499	0.5464	0.5237	0.5092	0.5047	0.5243	0.536	0.5234	0.5253		____________________________________________________________________________________________
1.41254	0.5712	0.5505	0.5076	0.499	0.5462	0.5236	0.5092	0.5047	0.5242	0.5359	0.5234	0.5253		Source of variation Variation Degrees of Variance F-Value Significance
1.44544	0.5708	0.5504	0.5076	0.499	0.546	0.5236	0.5092	0.5047	0.5242	0.5359	0.5234	0.5253		freedom level (%)
1.47911	0.5704	0.5503	0.5076	0.499	0.5459	0.5235	0.5091	0.5047	0.5241	0.5358	0.5234	0.5253		____________________________________________________________________________________________
1.51356	0.57	0.5502	0.5076	0.499	0.5457	0.5234	0.5091	0.5047	0.5241	0.5357	0.5233	0.5252		Explained by Regression 0.1035 2 0.051753 116.6599 0.0080
1.54882	0.5696	0.5501	0.5076	0.499	0.5455	0.5233	0.5091	0.5047	0.524	0.5356	0.5233	0.5252		Unexplained (Error) 0.0027 6 0.000444
1.58489	0.5692	0.5499	0.5075	0.499	0.5453	0.5232	0.5091	0.5047	0.524	0.5355	0.5233	0.5252		____________________________________________________________________________________________
1.62181	0.5688	0.5498	0.5075	0.499	0.5451	0.5231	0.5091	0.5047	0.5239	0.5354	0.5233	0.5252		Total 0.1049 8
1.65959	0.5684	0.5497	0.5075	0.499	0.5449	0.523	0.509	0.5046	0.5239	0.5354	0.5233	0.5252		____________________________________________________________________________________________
1.69824	0.568	0.5495	0.5075	0.499	0.5447	0.5229	0.509	0.5046	0.5238	0.5353	0.5233	0.5251		Model: van Genuchten (1980)
1.7378	0.5675	0.5494	0.5075	0.499	0.5445	0.5228	0.509	0.5046	0.5238	0.5352	0.5232	0.5251		m: Dependent (Mualem, 1976) (m=1-1/n)
1.77828	0.5671	0.5492	0.5075	0.499	0.5443	0.5227	0.5089	0.5046	0.5237	0.5351	0.5232	0.5251		Residual Soil Water Content: Regression value (restriction to positive value)
1.8197	0.5666	0.5491	0.5075	0.499	0.5441	0.5226	0.5089	0.5046	0.5236	0.535	0.5232	0.5251		Saturated Soil Water Content: Extrapolated value < 1 (Jong-van-Lier and Dourado-Neto, 1993)
1.86209	0.5661	0.5489	0.5074	0.499	0.5438	0.5225	0.5089	0.5046	0.5236	0.5349	0.5232	0.525		Parameters:
1.90546	0.5657	0.5488	0.5074	0.499	0.5436	0.5223	0.5089	0.5046	0.5235	0.5348	0.5231	0.525		Alpha: 0.1313
1.94984	0.5652	0.5486	0.5074	0.499	0.5434	0.5222	0.5088	0.5046	0.5235	0.5347	0.5231	0.525		m: 0.1553
1.99526	0.5647	0.5484	0.5074	0.499	0.5431	0.5221	0.5088	0.5046	0.5234	0.5345	0.5231	0.525		n: 1.1839
2.04174	0.5641	0.5483	0.5074	0.499	0.5429	0.522	0.5088	0.5046	0.5233	0.5344	0.5231	0.5249		Residual soil moisture: 0.200
2.0893	0.5636	0.5481	0.5074	0.4989	0.5426	0.5219	0.5087	0.5045	0.5233	0.5343	0.5231	0.5249		Saturated soil moisture: 0.553
2.13796	0.5631	0.5479	0.5073	0.4989	0.5424	0.5217	0.5087	0.5045	0.5232	0.5342	0.523	0.5249		Adjust coefficient: 0.989
2.18776	0.5625	0.5477	0.5073	0.4989	0.5421	0.5216	0.5087	0.5045	0.5231	0.5341	0.523	0.5249		Case: Iteractive method of Newton-Raphson
2.23872	0.562	0.5475	0.5073	0.4989	0.5419	0.5215	0.5086	0.5045	0.523	0.534	0.523	0.5248		Adjust coefficient: 0.989
2.29087	0.5614	0.5474	0.5073	0.4989	0.5416	0.5213	0.5086	0.5045	0.523	0.5338	0.523	0.5248		AIC: Akaike Information Criterion (Hippel, 1981): -15.7464
2.34423	0.5608	0.5472	0.5073	0.4989	0.5413	0.5212	0.5086	0.5045	0.5229	0.5337	0.5229	0.5248		Curve: 2
2.39883	0.5602	0.547	0.5073	0.4989	0.541	0.521	0.5085	0.5045	0.5228	0.5336	0.5229	0.5247		___________________________________
2.45471	0.5596	0.5468	0.5072	0.4989	0.5407	0.5209	0.5085	0.5044	0.5227	0.5334	0.5229	0.5247		Matric Soil Water Content
2.51189	0.559	0.5465	0.5072	0.4989	0.5404	0.5207	0.5085	0.5044	0.5226	0.5333	0.5228	0.5247		Potential _______________________
2.5704	0.5583	0.5463	0.5072	0.4989	0.5401	0.5206	0.5084	0.5044	0.5226	0.5332	0.5228	0.5246		Measured Estimated
2.63027	0.5577	0.5461	0.5072	0.4989	0.5398	0.5204	0.5084	0.5044	0.5225	0.533	0.5228	0.5246		___________________________________
2.69153	0.557	0.5459	0.5071	0.4989	0.5395	0.5203	0.5083	0.5044	0.5224	0.5329	0.5227	0.5246		0 0.553
2.75423	0.5564	0.5457	0.5071	0.4989	0.5392	0.5201	0.5083	0.5044	0.5223	0.5327	0.5227	0.5245		30 0.462
2.81838	0.5557	0.5454	0.5071	0.4989	0.5389	0.5199	0.5082	0.5044	0.5222	0.5326	0.5227	0.5245		60 0.431
2.88403	0.555	0.5452	0.5071	0.4989	0.5385	0.5198	0.5082	0.5043	0.5221	0.5324	0.5226	0.5244		100 0.412
2.95121	0.5543	0.5449	0.5071	0.4989	0.5382	0.5196	0.5082	0.5043	0.522	0.5323	0.5226	0.5244		330 0.379
3.01995	0.5536	0.5447	0.507	0.4989	0.5378	0.5194	0.5081	0.5043	0.5219	0.5321	0.5226	0.5244		1000 0.352
3.0903	0.5528	0.5444	0.507	0.4989	0.5375	0.5192	0.5081	0.5043	0.5218	0.5319	0.5225	0.5243		5000 0.325
3.16228	0.5521	0.5442	0.507	0.4989	0.5371	0.519	0.508	0.5043	0.5217	0.5318	0.5225	0.5243		40000 0.264
3.23594	0.5513	0.5439	0.5069	0.4989	0.5367	0.5189	0.508	0.5042	0.5216	0.5316	0.5224	0.5242		60000 0.254
3.31131	0.5506	0.5436	0.5069	0.4989	0.5364	0.5187	0.5079	0.5042	0.5215	0.5314	0.5224	0.5242		___________________________________
3.38844	0.5498	0.5434	0.5069	0.4989	0.536	0.5185	0.5078	0.5042	0.5214	0.5312	0.5224	0.5241
3.46737	0.549	0.5431	0.5069	0.4989	0.5356	0.5183	0.5078	0.5042	0.5212	0.531	0.5223	0.5241		ANOVA
3.54813	0.5482	0.5428	0.5068	0.4989	0.5352	0.518	0.5077	0.5042	0.5211	0.5308	0.5223	0.524		____________________________________________________________________________________________
3.63078	0.5474	0.5425	0.5068	0.4989	0.5348	0.5178	0.5077	0.5041	0.521	0.5307	0.5222	0.524		Source of variation Variation Degrees of Variance F-Value Significance
3.71535	0.5465	0.5422	0.5068	0.4989	0.5344	0.5176	0.5076	0.5041	0.5209	0.5305	0.5222	0.5239		freedom level (%)
3.80189	0.5457	0.5419	0.5067	0.4989	0.534	0.5174	0.5076	0.5041	0.5207	0.5303	0.5221	0.5239		____________________________________________________________________________________________
3.89045	0.5448	0.5416	0.5067	0.4989	0.5335	0.5172	0.5075	0.5041	0.5206	0.53	0.5221	0.5238		Explained by Regression 0.0730 2 0.036489 277.5102 0.0025
3.98107	0.5439	0.5412	0.5067	0.4989	0.5331	0.5169	0.5074	0.504	0.5205	0.5298	0.522	0.5238		Unexplained (Error) 0.0008 6 0.000131
4.0738	0.5431	0.5409	0.5066	0.4989	0.5326	0.5167	0.5074	0.504	0.5203	0.5296	0.522	0.5237		____________________________________________________________________________________________
4.16869	0.5422	0.5406	0.5066	0.4989	0.5322	0.5165	0.5073	0.504	0.5202	0.5294	0.5219	0.5237		Total 0.0734 8
4.2658	0.5412	0.5402	0.5065	0.4989	0.5317	0.5162	0.5072	0.504	0.5201	0.5292	0.5219	0.5236		____________________________________________________________________________________________
4.36516	0.5403	0.5399	0.5065	0.4989	0.5313	0.516	0.5072	0.5039	0.5199	0.529	0.5218	0.5235		Model: van Genuchten (1980)
4.46684	0.5394	0.5395	0.5065	0.4989	0.5308	0.5157	0.5071	0.5039	0.5198	0.5287	0.5218	0.5235		m: Dependent (Mualem, 1976) (m=1-1/n)
4.57088	0.5384	0.5392	0.5064	0.4989	0.5303	0.5154	0.507	0.5039	0.5196	0.5285	0.5217	0.5234		Residual Soil Water Content: Regression value (restriction to positive value)
4.67735	0.5375	0.5388	0.5064	0.4989	0.5298	0.5152	0.5069	0.5038	0.5195	0.5282	0.5217	0.5233		Saturated Soil Water Content: Extrapolated value < 1 (Jong-van-Lier and Dourado-Neto, 1993)
4.7863	0.5365	0.5384	0.5063	0.4989	0.5293	0.5149	0.5069	0.5038	0.5193	0.528	0.5216	0.5233		Parameters:
4.89779	0.5355	0.538	0.5063	0.4989	0.5288	0.5146	0.5068	0.5038	0.5191	0.5277	0.5215	0.5232		Alpha: 0.0469
5.01187	0.5345	0.5376	0.5062	0.4988	0.5283	0.5144	0.5067	0.5038	0.519	0.5275	0.5215	0.5231		m: 0.1281
5.12861	0.5335	0.5372	0.5062	0.4988	0.5278	0.5141	0.5066	0.5037	0.5188	0.5272	0.5214	0.5231		n: 1.1469
5.24807	0.5325	0.5368	0.5062	0.4988	0.5272	0.5138	0.5065	0.5037	0.5186	0.527	0.5213	0.523		Residual soil moisture: 0.200
5.37032	0.5314	0.5364	0.5061	0.4988	0.5267	0.5135	0.5064	0.5037	0.5184	0.5267	0.5213	0.5229		Saturated soil moisture: 0.526
5.49541	0.5304	0.536	0.5061	0.4988	0.5262	0.5132	0.5063	0.5036	0.5183	0.5264	0.5212	0.5228		Adjust coefficient: 0.964
5.62341	0.5293	0.5356	0.506	0.4988	0.5256	0.5129	0.5063	0.5036	0.5181	0.5261	0.5211	0.5228		Case: Iteractive method of Newton-Raphson
5.7544	0.5282	0.5351	0.5059	0.4988	0.525	0.5126	0.5062	0.5035	0.5179	0.5258	0.5211	0.5227		Adjust coefficient: 0.964
5.88844	0.5272	0.5347	0.5059	0.4988	0.5245	0.5122	0.5061	0.5035	0.5177	0.5255	0.521	0.5226		AIC: Akaike Information Criterion (Hippel, 1981): -12.2074
6.0256	0.5261	0.5342	0.5058	0.4988	0.5239	0.5119	0.506	0.5035	0.5175	0.5252	0.5209	0.5225		Curve: 3
6.16595	0.525	0.5338	0.5058	0.4988	0.5233	0.5116	0.5059	0.5034	0.5173	0.5249	0.5208	0.5224		___________________________________
6.30957	0.5238	0.5333	0.5057	0.4988	0.5227	0.5112	0.5058	0.5034	0.5171	0.5246	0.5207	0.5223		Matric Soil Water Content
6.45654	0.5227	0.5328	0.5057	0.4988	0.5221	0.5109	0.5057	0.5033	0.5169	0.5243	0.5207	0.5222		Potential _______________________
6.60693	0.5216	0.5324	0.5056	0.4988	0.5215	0.5106	0.5056	0.5033	0.5166	0.524	0.5206	0.5221		Measured Estimated
6.76083	0.5204	0.5319	0.5055	0.4988	0.5209	0.5102	0.5054	0.5033	0.5164	0.5237	0.5205	0.522		___________________________________
6.91831	0.5193	0.5314	0.5055	0.4988	0.5202	0.5098	0.5053	0.5032	0.5162	0.5233	0.5204	0.5219		0 0.526
7.07946	0.5181	0.5308	0.5054	0.4988	0.5196	0.5095	0.5052	0.5032	0.516	0.523	0.5203	0.5218		30 0.485
7.24436	0.5169	0.5303	0.5053	0.4988	0.519	0.5091	0.5051	0.5031	0.5157	0.5227	0.5202	0.5217		60 0.466
7.4131	0.5157	0.5298	0.5053	0.4988	0.5183	0.5087	0.505	0.5031	0.5155	0.5223	0.5201	0.5216		100 0.447
7.58578	0.5145	0.5293	0.5052	0.4987	0.5177	0.5083	0.5048	0.503	0.5153	0.522	0.52	0.5215		330 0.410
7.76247	0.5133	0.5287	0.5051	0.4987	0.517	0.508	0.5047	0.503	0.515	0.5216	0.5199	0.5214		1000 0.410
7.94328	0.5121	0.5282	0.505	0.4987	0.5163	0.5076	0.5046	0.5029	0.5148	0.5212	0.5198	0.5213		5000 0.371
8.12831	0.5109	0.5276	0.505	0.4987	0.5156	0.5072	0.5045	0.5029	0.5145	0.5209	0.5197	0.5212		40000 0.292
8.31764	0.5097	0.5271	0.5049	0.4987	0.5149	0.5068	0.5043	0.5028	0.5142	0.5205	0.5196	0.5211		60000 0.284
8.51138	0.5084	0.5265	0.5048	0.4987	0.5142	0.5063	0.5042	0.5027	0.514	0.5201	0.5195	0.5209		___________________________________
8.70964	0.5072	0.5259	0.5047	0.4987	0.5135	0.5059	0.504	0.5027	0.5137	0.5197	0.5194	0.5208
8.91251	0.5059	0.5253	0.5046	0.4987	0.5128	0.5055	0.5039	0.5026	0.5134	0.5193	0.5192	0.5207		ANOVA
9.12011	0.5047	0.5247	0.5045	0.4987	0.5121	0.5051	0.5038	0.5026	0.5131	0.5189	0.5191	0.5205		____________________________________________________________________________________________
9.33254	0.5034	0.5241	0.5044	0.4987	0.5114	0.5046	0.5036	0.5025	0.5128	0.5185	0.519	0.5204		Source of variation Variation Degrees of Variance F-Value Significance
9.54993	0.5021	0.5235	0.5043	0.4987	0.5106	0.5042	0.5034	0.5024	0.5126	0.5181	0.5189	0.5203		freedom level (%)
9.77237	0.5008	0.5229	0.5042	0.4987	0.5099	0.5037	0.5033	0.5024	0.5123	0.5177	0.5187	0.5201		____________________________________________________________________________________________
10	0.4995	0.5222	0.5042	0.4986	0.5092	0.5033	0.5031	0.5023	0.512	0.5173	0.5186	0.52		Explained by Regression 0.0525 2 0.026272 80.7959 0.0145
10.2329	0.4982	0.5216	0.5041	0.4986	0.5084	0.5028	0.503	0.5022	0.5116	0.5168	0.5185	0.5199		Unexplained (Error) 0.0020 6 0.000325
10.4713	0.4969	0.521	0.5039	0.4986	0.5076	0.5023	0.5028	0.5022	0.5113	0.5164	0.5183	0.5197		____________________________________________________________________________________________
10.7152	0.4956	0.5203	0.5038	0.4986	0.5069	0.5019	0.5026	0.5021	0.511	0.516	0.5182	0.5196		Total 0.0549 8
10.9648	0.4943	0.5196	0.5037	0.4986	0.5061	0.5014	0.5025	0.502	0.5107	0.5155	0.5181	0.5194		____________________________________________________________________________________________
11.2202	0.493	0.519	0.5036	0.4986	0.5053	0.5009	0.5023	0.5019	0.5103	0.5151	0.5179	0.5192		Model: van Genuchten (1980)
11.4815	0.4917	0.5183	0.5035	0.4986	0.5045	0.5004	0.5021	0.5019	0.51	0.5146	0.5178	0.5191		m: Dependent (Mualem, 1976) (m=1-1/n)
11.749	0.4904	0.5176	0.5034	0.4986	0.5037	0.4999	0.5019	0.5018	0.5097	0.5141	0.5176	0.5189		Residual Soil Water Content: Regression value (restriction to positive value)
12.0226	0.489	0.5169	0.5033	0.4986	0.5029	0.4994	0.5017	0.5017	0.5093	0.5137	0.5175	0.5187		Saturated Soil Water Content: Extrapolated value < 1 (Jong-van-Lier and Dourado-Neto, 1993)
12.3027	0.4877	0.5162	0.5031	0.4985	0.5021	0.4989	0.5015	0.5016	0.509	0.5132	0.5173	0.5186		Parameters:
12.5893	0.4864	0.5155	0.503	0.4985	0.5013	0.4984	0.5013	0.5015	0.5086	0.5127	0.5171	0.5184		Alpha: 0.0892
12.8825	0.485	0.5148	0.5029	0.4985	0.5005	0.4978	0.5011	0.5014	0.5082	0.5122	0.517	0.5182		m: 0.1560
13.1826	0.4837	0.514	0.5028	0.4985	0.4997	0.4973	0.5009	0.5013	0.5079	0.5117	0.5168	0.518		n: 1.1848
13.4896	0.4823	0.5133	0.5026	0.4985	0.4988	0.4968	0.5007	0.5013	0.5075	0.5112	0.5166	0.5178		Residual soil moisture: 0.198
13.8038	0.481	0.5126	0.5025	0.4985	0.498	0.4962	0.5005	0.5012	0.5071	0.5107	0.5164	0.5176		Saturated soil moisture: 0.555
14.1254	0.4796	0.5118	0.5023	0.4985	0.4972	0.4957	0.5003	0.5011	0.5067	0.5102	0.5163	0.5174		Adjust coefficient: 0.965
14.4544	0.4783	0.5111	0.5022	0.4984	0.4963	0.4951	0.5	0.501	0.5063	0.5097	0.5161	0.5172		Case: Iteractive method of Newton-Raphson
14.7911	0.4769	0.5103	0.5021	0.4984	0.4955	0.4946	0.4998	0.5009	0.5059	0.5091	0.5159	0.517		Adjust coefficient: 0.965
15.1356	0.4755	0.5095	0.5019	0.4984	0.4946	0.494	0.4996	0.5008	0.5055	0.5086	0.5157	0.5168		AIC: Akaike Information Criterion (Hippel, 1981): -10.8597
15.4882	0.4742	0.5088	0.5018	0.4984	0.4938	0.4934	0.4994	0.5007	0.5051	0.5081	0.5155	0.5166		Curve: 4
15.8489	0.4728	0.508	0.5016	0.4984	0.4929	0.4929	0.4991	0.5005	0.5047	0.5075	0.5153	0.5164		___________________________________
16.2181	0.4714	0.5072	0.5014	0.4983	0.492	0.4923	0.4989	0.5004	0.5042	0.507	0.5151	0.5162		Matric Soil Water Content
16.5959	0.4701	0.5064	0.5013	0.4983	0.4911	0.4917	0.4986	0.5003	0.5038	0.5064	0.5149	0.516		Potential _______________________
16.9824	0.4687	0.5056	0.5011	0.4983	0.4903	0.4911	0.4984	0.5002	0.5034	0.5059	0.5146	0.5157		Measured Estimated
17.378	0.4673	0.5048	0.5009	0.4983	0.4894	0.4905	0.4981	0.5001	0.5029	0.5053	0.5144	0.5155		___________________________________
17.7828	0.466	0.504	0.5007	0.4983	0.4885	0.4899	0.4978	0.5	0.5025	0.5047	0.5142	0.5152		0 0.555
18.197	0.4646	0.5031	0.5006	0.4982	0.4876	0.4893	0.4976	0.4998	0.502	0.5042	0.514	0.515		30 0.477
18.6209	0.4632	0.5023	0.5004	0.4982	0.4867	0.4887	0.4973	0.4997	0.5016	0.5036	0.5137	0.5148		60 0.445
19.0546	0.4619	0.5015	0.5002	0.4982	0.4858	0.4881	0.497	0.4996	0.5011	0.503	0.5135	0.5145		100 0.415
19.4984	0.4605	0.5007	0.5	0.4982	0.4849	0.4875	0.4967	0.4994	0.5006	0.5024	0.5132	0.5142		330 0.403
19.9526	0.4591	0.4998	0.4998	0.4982	0.484	0.4868	0.4964	0.4993	0.5001	0.5018	0.513	0.514		1000 0.381
20.4174	0.4578	0.499	0.4996	0.4981	0.4831	0.4862	0.4962	0.4992	0.4997	0.5012	0.5127	0.5137		5000 0.335
20.893	0.4564	0.4981	0.4994	0.4981	0.4822	0.4856	0.4959	0.499	0.4992	0.5006	0.5125	0.5134		40000 0.259
21.3796	0.4551	0.4972	0.4992	0.4981	0.4813	0.4849	0.4956	0.4989	0.4987	0.5	0.5122	0.5132		60000 0.249
21.8776	0.4537	0.4964	0.4989	0.4981	0.4804	0.4843	0.4952	0.4987	0.4982	0.4994	0.5119	0.5129		___________________________________
22.3872	0.4523	0.4955	0.4987	0.498	0.4794	0.4836	0.4949	0.4986	0.4977	0.4988	0.5117	0.5126
22.9087	0.451	0.4946	0.4985	0.498	0.4785	0.483	0.4946	0.4984	0.4971	0.4982	0.5114	0.5123		ANOVA
23.4423	0.4496	0.4938	0.4983	0.498	0.4776	0.4823	0.4943	0.4982	0.4966	0.4975	0.5111	0.512		____________________________________________________________________________________________
23.9883	0.4483	0.4929	0.498	0.4979	0.4767	0.4817	0.494	0.4981	0.4961	0.4969	0.5108	0.5117		Source of variation Variation Degrees of Variance F-Value Significance
24.5471	0.4469	0.492	0.4978	0.4979	0.4757	0.481	0.4936	0.4979	0.4956	0.4963	0.5105	0.5114		freedom level (%)
25.1189	0.4456	0.4911	0.4975	0.4979	0.4748	0.4803	0.4933	0.4977	0.495	0.4956	0.5102	0.5111		____________________________________________________________________________________________
25.704	0.4442	0.4902	0.4973	0.4978	0.4739	0.4797	0.4929	0.4976	0.4945	0.495	0.5099	0.5108		Explained by Regression 0.0749 2 0.037460 81.6045 0.0142
26.3027	0.4429	0.4893	0.497	0.4978	0.4729	0.479	0.4926	0.4974	0.4939	0.4943	0.5096	0.5104		Unexplained (Error) 0.0028 6 0.000459
26.9153	0.4415	0.4884	0.4968	0.4978	0.472	0.4783	0.4922	0.4972	0.4934	0.4937	0.5093	0.5101		____________________________________________________________________________________________
27.5423	0.4402	0.4875	0.4965	0.4977	0.4711	0.4776	0.4919	0.497	0.4928	0.493	0.509	0.5098		Total 0.0788 8
28.1838	0.4389	0.4866	0.4962	0.4977	0.4701	0.4769	0.4915	0.4968	0.4923	0.4924	0.5086	0.5094		____________________________________________________________________________________________
28.8403	0.4375	0.4856	0.496	0.4977	0.4692	0.4762	0.4911	0.4966	0.4917	0.4917	0.5083	0.5091		Model: van Genuchten (1980)
29.5121	0.4362	0.4847	0.4957	0.4976	0.4683	0.4755	0.4908	0.4964	0.4911	0.491	0.508	0.5087		m: Dependent (Mualem, 1976) (m=1-1/n)
30.1995	0.4349	0.4838	0.4954	0.4976	0.4673	0.4748	0.4904	0.4962	0.4905	0.4904	0.5076	0.5084		Residual Soil Water Content: Regression value (restriction to positive value)
30.903	0.4336	0.4829	0.4951	0.4976	0.4664	0.4741	0.49	0.496	0.4899	0.4897	0.5073	0.508		Saturated Soil Water Content: Extrapolated value < 1 (Jong-van-Lier and Dourado-Neto, 1993)
31.6228	0.4322	0.4819	0.4948	0.4975	0.4654	0.4734	0.4896	0.4958	0.4894	0.489	0.5069	0.5076		Parameters:
32.3594	0.4309	0.481	0.4945	0.4975	0.4645	0.4727	0.4892	0.4956	0.4888	0.4883	0.5065	0.5073		Alpha: 0.0822
33.1131	0.4296	0.4801	0.4942	0.4974	0.4635	0.472	0.4888	0.4954	0.4882	0.4876	0.5062	0.5069		m: 0.1306
33.8844	0.4283	0.4791	0.4938	0.4974	0.4626	0.4713	0.4884	0.4952	0.4876	0.487	0.5058	0.5065		n: 1.1503
34.6737	0.427	0.4782	0.4935	0.4973	0.4616	0.4706	0.488	0.4949	0.4869	0.4863	0.5054	0.5061		Residual soil moisture: 0.200
35.4813	0.4257	0.4773	0.4932	0.4973	0.4607	0.4699	0.4876	0.4947	0.4863	0.4856	0.505	0.5057		Saturated soil moisture: 0.537
36.3078	0.4244	0.4763	0.4928	0.4972	0.4597	0.4692	0.4871	0.4945	0.4857	0.4849	0.5046	0.5053		Adjust coefficient: 0.975
37.1535	0.4231	0.4754	0.4925	0.4972	0.4588	0.4684	0.4867	0.4942	0.4851	0.4842	0.5042	0.5049		Case: Iteractive method of Newton-Raphson
38.0189	0.4218	0.4744	0.4921	0.4971	0.4579	0.4677	0.4863	0.494	0.4845	0.4835	0.5038	0.5045		Adjust coefficient: 0.975
38.9045	0.4206	0.4735	0.4918	0.4971	0.4569	0.467	0.4858	0.4937	0.4838	0.4828	0.5034	0.5041		AIC: Akaike Information Criterion (Hippel, 1981): -13.3161
39.8107	0.4193	0.4725	0.4914	0.497	0.456	0.4663	0.4854	0.4935	0.4832	0.4821	0.503	0.5037		Curve: 5
40.738	0.418	0.4716	0.4911	0.497	0.455	0.4655	0.4849	0.4932	0.4825	0.4814	0.5026	0.5032		___________________________________
41.6869	0.4167	0.4706	0.4907	0.4969	0.4541	0.4648	0.4845	0.4929	0.4819	0.4806	0.5021	0.5028		Matric Soil Water Content
42.658	0.4155	0.4697	0.4903	0.4969	0.4531	0.4641	0.484	0.4927	0.4813	0.4799	0.5017	0.5024		Potential _______________________
43.6516	0.4142	0.4687	0.4899	0.4968	0.4522	0.4633	0.4835	0.4924	0.4806	0.4792	0.5013	0.5019		Measured Estimated
44.6684	0.413	0.4678	0.4895	0.4967	0.4512	0.4626	0.4831	0.4921	0.4799	0.4785	0.5008	0.5015		___________________________________
45.7088	0.4117	0.4668	0.4891	0.4967	0.4503	0.4618	0.4826	0.4918	0.4793	0.4778	0.5004	0.501		0 0.537
46.7735	0.4105	0.4658	0.4887	0.4966	0.4493	0.4611	0.4821	0.4915	0.4786	0.4771	0.4999	0.5005		30 0.474
47.863	0.4093	0.4649	0.4883	0.4965	0.4484	0.4604	0.4816	0.4912	0.478	0.4763	0.4994	0.5001		60 0.455
48.9779	0.408	0.4639	0.4879	0.4965	0.4475	0.4596	0.4811	0.4909	0.4773	0.4756	0.499	0.4996		100 0.432
50.1187	0.4068	0.463	0.4874	0.4964	0.4465	0.4589	0.4806	0.4906	0.4766	0.4749	0.4985	0.4991		330 0.416
51.2861	0.4056	0.462	0.487	0.4963	0.4456	0.4581	0.4801	0.4903	0.4759	0.4741	0.498	0.4986		1000 0.388
52.4807	0.4044	0.461	0.4866	0.4962	0.4446	0.4574	0.4796	0.49	0.4752	0.4734	0.4975	0.4981		5000 0.357
53.7032	0.4031	0.4601	0.4861	0.4962	0.4437	0.4566	0.4791	0.4897	0.4746	0.4727	0.497	0.4977		40000 0.287
54.9541	0.4019	0.4591	0.4857	0.4961	0.4428	0.4559	0.4786	0.4893	0.4739	0.472	0.4965	0.4972		60000 0.276
56.2341	0.4007	0.4582	0.4852	0.496	0.4418	0.4551	0.4781	0.489	0.4732	0.4712	0.496	0.4966		___________________________________
57.544	0.3996	0.4572	0.4847	0.4959	0.4409	0.4544	0.4776	0.4887	0.4725	0.4705	0.4955	0.4961
58.8844	0.3984	0.4562	0.4842	0.4958	0.44	0.4536	0.477	0.4883	0.4718	0.4697	0.495	0.4956		ANOVA
60.256	0.3972	0.4553	0.4838	0.4957	0.439	0.4529	0.4765	0.488	0.4711	0.469	0.4944	0.4951		____________________________________________________________________________________________
61.6595	0.396	0.4543	0.4833	0.4956	0.4381	0.4521	0.476	0.4876	0.4704	0.4683	0.4939	0.4946		Source of variation Variation Degrees of Variance F-Value Significance
63.0957	0.3948	0.4533	0.4828	0.4955	0.4372	0.4514	0.4754	0.4873	0.4697	0.4675	0.4934	0.494		freedom level (%)
64.5654	0.3937	0.4524	0.4823	0.4955	0.4363	0.4506	0.4749	0.4869	0.469	0.4668	0.4928	0.4935		____________________________________________________________________________________________
66.0693	0.3925	0.4514	0.4818	0.4954	0.4353	0.4499	0.4743	0.4865	0.4683	0.4661	0.4923	0.493		Explained by Regression 0.0571 2 0.028528 116.5089 0.0081
67.6083	0.3913	0.4505	0.4812	0.4952	0.4344	0.4491	0.4738	0.4861	0.4676	0.4653	0.4917	0.4924		Unexplained (Error) 0.0015 6 0.000245
69.1831	0.3902	0.4495	0.4807	0.4951	0.4335	0.4483	0.4732	0.4858	0.4669	0.4646	0.4911	0.4919		____________________________________________________________________________________________
70.7946	0.389	0.4486	0.4802	0.495	0.4326	0.4476	0.4726	0.4854	0.4661	0.4638	0.4906	0.4913		Total 0.0586 8
72.4436	0.3879	0.4476	0.4796	0.4949	0.4317	0.4468	0.4721	0.485	0.4654	0.4631	0.49	0.4908		____________________________________________________________________________________________
74.131	0.3868	0.4466	0.4791	0.4948	0.4307	0.4461	0.4715	0.4846	0.4647	0.4623	0.4894	0.4902		Model: van Genuchten (1980)
75.8578	0.3857	0.4457	0.4785	0.4947	0.4298	0.4453	0.4709	0.4842	0.464	0.4616	0.4888	0.4896		m: Dependent (Mualem, 1976) (m=1-1/n)
77.6247	0.3845	0.4447	0.478	0.4946	0.4289	0.4446	0.4703	0.4838	0.4633	0.4608	0.4883	0.489		Residual Soil Water Content: Regression value (restriction to positive value)
79.4328	0.3834	0.4438	0.4774	0.4945	0.428	0.4438	0.4698	0.4833	0.4625	0.4601	0.4877	0.4885		Saturated Soil Water Content: Extrapolated value < 1 (Jong-van-Lier and Dourado-Neto, 1993)
81.2831	0.3823	0.4428	0.4769	0.4943	0.4271	0.4431	0.4692	0.4829	0.4618	0.4594	0.4871	0.4879		Parameters:
83.1764	0.3812	0.4419	0.4763	0.4942	0.4262	0.4423	0.4686	0.4825	0.4611	0.4586	0.4865	0.4873		Alpha: 0.0756
85.1138	0.3801	0.4409	0.4757	0.4941	0.4253	0.4416	0.468	0.482	0.4604	0.4579	0.4859	0.4867		m: 0.1234
87.0964	0.379	0.44	0.4751	0.4939	0.4244	0.4408	0.4674	0.4816	0.4596	0.4571	0.4852	0.4861		n: 1.1407
89.1251	0.3779	0.4391	0.4745	0.4938	0.4235	0.4401	0.4668	0.4812	0.4589	0.4564	0.4846	0.4855		Residual soil moisture: 0.200
91.2011	0.3768	0.4381	0.4739	0.4936	0.4226	0.4393	0.4662	0.4807	0.4582	0.4556	0.484	0.4849		Saturated soil moisture: 0.539
93.3254	0.3758	0.4372	0.4733	0.4935	0.4217	0.4385	0.4656	0.4803	0.4574	0.4549	0.4834	0.4843		Adjust coefficient: 0.960
95.4993	0.3747	0.4362	0.4727	0.4933	0.4208	0.4378	0.465	0.4798	0.4567	0.4541	0.4827	0.4837		Case: Iteractive method of Newton-Raphson
97.7237	0.3736	0.4353	0.4721	0.4932	0.4199	0.437	0.4644	0.4793	0.456	0.4534	0.4821	0.4831		Adjust coefficient: 0.960
100	0.3726	0.4344	0.4714	0.493	0.419	0.4363	0.4637	0.4788	0.4552	0.4527	0.4815	0.4825		AIC: Akaike Information Criterion (Hippel, 1981): -11.5894
102.329	0.3715	0.4334	0.4708	0.4929	0.4182	0.4355	0.4631	0.4784	0.4545	0.4519	0.4808	0.4818		Curve: 6
104.713	0.3705	0.4325	0.4702	0.4927	0.4173	0.4348	0.4625	0.4779	0.4538	0.4512	0.4802	0.4812		___________________________________
107.152	0.3694	0.4316	0.4695	0.4925	0.4164	0.4341	0.4619	0.4774	0.453	0.4504	0.4795	0.4806		Matric Soil Water Content
109.648	0.3684	0.4306	0.4689	0.4923	0.4155	0.4333	0.4612	0.4769	0.4523	0.4497	0.4788	0.48		Potential _______________________
112.202	0.3673	0.4297	0.4682	0.4922	0.4147	0.4326	0.4606	0.4764	0.4516	0.4489	0.4782	0.4793		Measured Estimated
114.815	0.3663	0.4288	0.4675	0.492	0.4138	0.4318	0.46	0.4759	0.4508	0.4482	0.4775	0.4787		___________________________________
117.49	0.3653	0.4279	0.4669	0.4918	0.4129	0.4311	0.4594	0.4754	0.4501	0.4475	0.4768	0.478		0 0.539
120.226	0.3643	0.4269	0.4662	0.4916	0.4121	0.4303	0.4587	0.4749	0.4493	0.4467	0.4762	0.4774		30 0.483
123.027	0.3633	0.426	0.4655	0.4914	0.4112	0.4296	0.4581	0.4743	0.4486	0.446	0.4755	0.4767		60 0.466
125.893	0.3623	0.4251	0.4648	0.4912	0.4103	0.4288	0.4574	0.4738	0.4479	0.4453	0.4748	0.4761		100 0.438
128.825	0.3613	0.4242	0.4641	0.491	0.4095	0.4281	0.4568	0.4733	0.4471	0.4445	0.4741	0.4754		330 0.420
131.826	0.3603	0.4233	0.4635	0.4908	0.4086	0.4274	0.4562	0.4727	0.4464	0.4438	0.4734	0.4748		1000 0.399
134.896	0.3593	0.4224	0.4628	0.4905	0.4078	0.4266	0.4555	0.4722	0.4456	0.443	0.4728	0.4741		5000 0.380
138.038	0.3583	0.4215	0.4621	0.4903	0.4069	0.4259	0.4549	0.4717	0.4449	0.4423	0.4721	0.4735		40000 0.292
141.254	0.3573	0.4206	0.4613	0.4901	0.4061	0.4252	0.4542	0.4711	0.4442	0.4416	0.4714	0.4728		60000 0.284
144.544	0.3564	0.4197	0.4606	0.4898	0.4052	0.4244	0.4536	0.4705	0.4434	0.4408	0.4707	0.4721		___________________________________
147.911	0.3554	0.4188	0.4599	0.4896	0.4044	0.4237	0.4529	0.47	0.4427	0.4401	0.47	0.4715
151.356	0.3545	0.4179	0.4592	0.4894	0.4035	0.423	0.4523	0.4694	0.4419	0.4394	0.4692	0.4708		ANOVA
154.882	0.3535	0.417	0.4585	0.4891	0.4027	0.4222	0.4516	0.4688	0.4412	0.4387	0.4685	0.4701		____________________________________________________________________________________________
158.489	0.3526	0.4161	0.4577	0.4888	0.4019	0.4215	0.4509	0.4683	0.4405	0.4379	0.4678	0.4695		Source of variation Variation Degrees of Variance F-Value Significance
162.181	0.3516	0.4152	0.457	0.4886	0.401	0.4208	0.4503	0.4677	0.4397	0.4372	0.4671	0.4688		freedom level (%)
165.959	0.3507	0.4143	0.4563	0.4883	0.4002	0.4201	0.4496	0.4671	0.439	0.4365	0.4664	0.4681		____________________________________________________________________________________________
169.824	0.3497	0.4134	0.4555	0.488	0.3994	0.4193	0.449	0.4665	0.4383	0.4358	0.4657	0.4674		Explained by Regression 0.0542 2 0.027113 71.1858 0.0180
173.78	0.3488	0.4126	0.4548	0.4877	0.3986	0.4186	0.4483	0.4659	0.4375	0.435	0.465	0.4667		Unexplained (Error) 0.0023 6 0.000381
177.828	0.3479	0.4117	0.454	0.4874	0.3978	0.4179	0.4476	0.4653	0.4368	0.4343	0.4642	0.4661		____________________________________________________________________________________________
181.97	0.347	0.4108	0.4533	0.4872	0.3969	0.4172	0.447	0.4647	0.436	0.4336	0.4635	0.4654		Total 0.0568 8
186.209	0.3461	0.4099	0.4525	0.4868	0.3961	0.4165	0.4463	0.4641	0.4353	0.4329	0.4628	0.4647		____________________________________________________________________________________________
190.546	0.3452	0.4091	0.4518	0.4865	0.3953	0.4157	0.4456	0.4635	0.4346	0.4321	0.462	0.464		Model: van Genuchten (1980)
194.984	0.3443	0.4082	0.451	0.4862	0.3945	0.415	0.445	0.4629	0.4338	0.4314	0.4613	0.4633		m: Dependent (Mualem, 1976) (m=1-1/n)
199.526	0.3434	0.4073	0.4502	0.4859	0.3937	0.4143	0.4443	0.4623	0.4331	0.4307	0.4606	0.4626		Residual Soil Water Content: Regression value (restriction to positive value)
204.174	0.3425	0.4065	0.4495	0.4856	0.3929	0.4136	0.4436	0.4617	0.4324	0.43	0.4598	0.4619		Saturated Soil Water Content: Extrapolated value < 1 (Jong-van-Lier and Dourado-Neto, 1993)
208.93	0.3416	0.4056	0.4487	0.4852	0.3921	0.4129	0.443	0.461	0.4317	0.4293	0.4591	0.4612		Parameters:
213.796	0.3407	0.4048	0.4479	0.4849	0.3913	0.4122	0.4423	0.4604	0.4309	0.4286	0.4584	0.4605		Alpha: 0.0128
218.776	0.3398	0.4039	0.4471	0.4845	0.3905	0.4115	0.4416	0.4598	0.4302	0.4279	0.4576	0.4598		m: 0.1512
223.872	0.339	0.4031	0.4464	0.4841	0.3897	0.4108	0.441	0.4592	0.4295	0.4272	0.4569	0.4592		n: 1.1782
229.087	0.3381	0.4022	0.4456	0.4838	0.3889	0.4101	0.4403	0.4585	0.4287	0.4265	0.4562	0.4585		Residual soil moisture: 0.200
234.423	0.3372	0.4014	0.4448	0.4834	0.3882	0.4094	0.4396	0.4579	0.428	0.4257	0.4554	0.4578		Saturated soil moisture: 0.508
239.883	0.3364	0.4005	0.444	0.483	0.3874	0.4087	0.439	0.4572	0.4273	0.425	0.4547	0.4571		Adjust coefficient: 0.959
245.471	0.3355	0.3997	0.4432	0.4826	0.3866	0.408	0.4383	0.4566	0.4266	0.4243	0.4539	0.4564		Case: Iteractive method of Newton-Raphson
251.189	0.3347	0.3989	0.4424	0.4822	0.3858	0.4073	0.4376	0.4559	0.4259	0.4236	0.4532	0.4557		Adjust coefficient: 0.959
257.04	0.3339	0.398	0.4417	0.4818	0.385	0.4066	0.437	0.4553	0.4251	0.4229	0.4524	0.455		AIC: Akaike Information Criterion (Hippel, 1981): -11.5181
263.027	0.333	0.3972	0.4409	0.4814	0.3843	0.4059	0.4363	0.4546	0.4244	0.4222	0.4517	0.4543		Curve: 7
269.153	0.3322	0.3964	0.4401	0.481	0.3835	0.4052	0.4356	0.454	0.4237	0.4215	0.4509	0.4536		___________________________________
275.423	0.3314	0.3956	0.4393	0.4805	0.3827	0.4045	0.4349	0.4533	0.423	0.4209	0.4502	0.4529		Matric Soil Water Content
281.838	0.3306	0.3947	0.4385	0.4801	0.382	0.4038	0.4343	0.4527	0.4223	0.4202	0.4494	0.4522		Potential _______________________
288.403	0.3297	0.3939	0.4377	0.4796	0.3812	0.4031	0.4336	0.452	0.4216	0.4195	0.4487	0.4515		Measured Estimated
295.121	0.3289	0.3931	0.4369	0.4792	0.3805	0.4024	0.4329	0.4513	0.4208	0.4188	0.4479	0.4508		___________________________________
301.995	0.3281	0.3923	0.4361	0.4787	0.3797	0.4018	0.4323	0.4507	0.4201	0.4181	0.4472	0.4501		0 0.508
309.03	0.3273	0.3915	0.4353	0.4782	0.379	0.4011	0.4316	0.45	0.4194	0.4174	0.4464	0.4494		30 0.491
316.228	0.3265	0.3907	0.4345	0.4777	0.3782	0.4004	0.4309	0.4493	0.4187	0.4167	0.4457	0.4487		60 0.475
323.594	0.3257	0.3899	0.4337	0.4772	0.3775	0.3997	0.4303	0.4487	0.418	0.416	0.4449	0.448		100 0.466
331.131	0.325	0.3891	0.4329	0.4767	0.3767	0.3991	0.4296	0.448	0.4173	0.4154	0.4442	0.4473		330 0.412
338.844	0.3242	0.3883	0.4321	0.4762	0.376	0.3984	0.4289	0.4473	0.4166	0.4147	0.4434	0.4466		1000 0.425
346.737	0.3234	0.3875	0.4312	0.4757	0.3753	0.3977	0.4283	0.4466	0.4159	0.414	0.4427	0.4459		5000 0.368
354.813	0.3226	0.3867	0.4304	0.4752	0.3745	0.397	0.4276	0.4459	0.4152	0.4133	0.4419	0.4452		40000 0.290
363.078	0.3219	0.3859	0.4296	0.4746	0.3738	0.3964	0.4269	0.4453	0.4145	0.4126	0.4412	0.4445		60000 0.278
371.535	0.3211	0.3851	0.4288	0.4741	0.3731	0.3957	0.4263	0.4446	0.4138	0.412	0.4404	0.4438		___________________________________
380.189	0.3204	0.3843	0.428	0.4735	0.3724	0.3951	0.4256	0.4439	0.4131	0.4113	0.4397	0.4431
389.045	0.3196	0.3836	0.4272	0.4729	0.3716	0.3944	0.4249	0.4432	0.4124	0.4106	0.4389	0.4424		ANOVA
398.107	0.3188	0.3828	0.4264	0.4724	0.3709	0.3937	0.4243	0.4425	0.4117	0.41	0.4382	0.4417		____________________________________________________________________________________________
407.38	0.3181	0.382	0.4256	0.4718	0.3702	0.3931	0.4236	0.4418	0.411	0.4093	0.4374	0.441		Source of variation Variation Degrees of Variance F-Value Significance
416.869	0.3174	0.3812	0.4248	0.4712	0.3695	0.3924	0.4229	0.4411	0.4103	0.4086	0.4367	0.4403		freedom level (%)
426.58	0.3166	0.3805	0.424	0.4706	0.3688	0.3918	0.4223	0.4404	0.4097	0.408	0.4359	0.4396		____________________________________________________________________________________________
436.516	0.3159	0.3797	0.4232	0.47	0.3681	0.3911	0.4216	0.4397	0.409	0.4073	0.4352	0.4389		Explained by Regression 0.0558 2 0.027895 71.9159 0.0177
446.684	0.3152	0.3789	0.4224	0.4693	0.3674	0.3905	0.421	0.4391	0.4083	0.4067	0.4344	0.4382		Unexplained (Error) 0.0023 6 0.000388
457.088	0.3145	0.3782	0.4216	0.4687	0.3667	0.3898	0.4203	0.4384	0.4076	0.406	0.4337	0.4375		____________________________________________________________________________________________
467.735	0.3137	0.3774	0.4208	0.468	0.366	0.3892	0.4196	0.4377	0.4069	0.4053	0.4329	0.4368		Total 0.0573 8
478.63	0.313	0.3767	0.42	0.4674	0.3653	0.3885	0.419	0.437	0.4062	0.4047	0.4322	0.4361		____________________________________________________________________________________________
489.779	0.3123	0.3759	0.4191	0.4667	0.3646	0.3879	0.4183	0.4363	0.4056	0.404	0.4314	0.4354		Model: van Genuchten (1980)
501.187	0.3116	0.3752	0.4183	0.4661	0.3639	0.3872	0.4177	0.4356	0.4049	0.4034	0.4307	0.4347		m: Dependent (Mualem, 1976) (m=1-1/n)
512.861	0.3109	0.3744	0.4175	0.4654	0.3632	0.3866	0.417	0.4349	0.4042	0.4027	0.43	0.434		Residual Soil Water Content: Regression value (restriction to positive value)
524.807	0.3102	0.3737	0.4167	0.4647	0.3625	0.386	0.4164	0.4342	0.4035	0.4021	0.4292	0.4333		Saturated Soil Water Content: Extrapolated value < 1 (Jong-van-Lier and Dourado-Neto, 1993)
537.032	0.3095	0.373	0.4159	0.464	0.3618	0.3853	0.4157	0.4335	0.4029	0.4015	0.4285	0.4326		Parameters:
549.541	0.3088	0.3722	0.4151	0.4633	0.3612	0.3847	0.4151	0.4328	0.4022	0.4008	0.4277	0.4319		Alpha: 0.0252
562.341	0.3082	0.3715	0.4143	0.4626	0.3605	0.3841	0.4144	0.4321	0.4015	0.4002	0.427	0.4312		m: 0.1221
575.44	0.3075	0.3708	0.4135	0.4619	0.3598	0.3835	0.4138	0.4314	0.4009	0.3995	0.4263	0.4306		n: 1.1391
588.844	0.3068	0.37	0.4127	0.4611	0.3591	0.3828	0.4131	0.4307	0.4002	0.3989	0.4255	0.4299		Residual soil moisture: 0.200
602.56	0.3061	0.3693	0.4119	0.4604	0.3585	0.3822	0.4125	0.43	0.3995	0.3983	0.4248	0.4292		Saturated soil moisture: 0.510
616.595	0.3055	0.3686	0.4111	0.4596	0.3578	0.3816	0.4118	0.4293	0.3989	0.3976	0.424	0.4285		Adjust coefficient: 0.954
630.957	0.3048	0.3679	0.4104	0.4589	0.3571	0.381	0.4112	0.4286	0.3982	0.397	0.4233	0.4278		Case: Iteractive method of Newton-Raphson
645.654	0.3041	0.3672	0.4096	0.4581	0.3565	0.3803	0.4106	0.4279	0.3976	0.3964	0.4226	0.4271		Adjust coefficient: 0.954
660.693	0.3035	0.3664	0.4088	0.4573	0.3558	0.3797	0.4099	0.4272	0.3969	0.3957	0.4218	0.4265		AIC: Akaike Information Criterion (Hippel, 1981): -11.9482
676.083	0.3028	0.3657	0.408	0.4566	0.3552	0.3791	0.4093	0.4265	0.3963	0.3951	0.4211	0.4258		Curve: 8
691.831	0.3022	0.365	0.4072	0.4558	0.3545	0.3785	0.4086	0.4258	0.3956	0.3945	0.4204	0.4251		___________________________________
707.946	0.3015	0.3643	0.4064	0.455	0.3539	0.3779	0.408	0.4251	0.395	0.3939	0.4197	0.4244		Matric Soil Water Content
724.436	0.3009	0.3636	0.4056	0.4542	0.3532	0.3773	0.4074	0.4244	0.3943	0.3932	0.4189	0.4238		Potential _______________________
741.31	0.3003	0.3629	0.4048	0.4533	0.3526	0.3767	0.4067	0.4237	0.3937	0.3926	0.4182	0.4231		Measured Estimated
758.578	0.2996	0.3622	0.404	0.4525	0.3519	0.3761	0.4061	0.423	0.393	0.392	0.4175	0.4224		___________________________________
776.247	0.299	0.3615	0.4033	0.4517	0.3513	0.3755	0.4055	0.4223	0.3924	0.3914	0.4168	0.4217		0 0.510
794.328	0.2984	0.3608	0.4025	0.4509	0.3507	0.3749	0.4048	0.4216	0.3918	0.3908	0.416	0.4211		30 0.476
812.831	0.2978	0.3602	0.4017	0.45	0.35	0.3743	0.4042	0.421	0.3911	0.3902	0.4153	0.4204		60 0.464
831.764	0.2972	0.3595	0.4009	0.4492	0.3494	0.3737	0.4036	0.4203	0.3905	0.3896	0.4146	0.4197		100 0.467
851.138	0.2965	0.3588	0.4002	0.4483	0.3488	0.3731	0.403	0.4196	0.3898	0.389	0.4139	0.4191		330 0.422
870.964	0.2959	0.3581	0.3994	0.4474	0.3481	0.3725	0.4023	0.4189	0.3892	0.3883	0.4132	0.4184		1000 0.415
891.251	0.2953	0.3574	0.3986	0.4466	0.3475	0.3719	0.4017	0.4182	0.3886	0.3877	0.4125	0.4177		5000 0.387
912.011	0.2947	0.3568	0.3978	0.4457	0.3469	0.3713	0.4011	0.4175	0.388	0.3871	0.4118	0.4171		40000 0.305
933.254	0.2941	0.3561	0.3971	0.4448	0.3463	0.3707	0.4005	0.4168	0.3873	0.3865	0.4111	0.4164		60000 0.293
954.993	0.2935	0.3554	0.3963	0.4439	0.3457	0.3701	0.3999	0.4161	0.3867	0.3859	0.4103	0.4157		___________________________________
977.237	0.293	0.3548	0.3956	0.443	0.345	0.3695	0.3992	0.4154	0.3861	0.3853	0.4096	0.4151
1000	0.2924	0.3541	0.3948	0.4421	0.3444	0.369	0.3986	0.4147	0.3855	0.3847	0.4089	0.4144		ANOVA
1023.29	0.2918	0.3534	0.394	0.4412	0.3438	0.3684	0.398	0.4141	0.3848	0.3842	0.4082	0.4138		____________________________________________________________________________________________
1047.13	0.2912	0.3528	0.3933	0.4403	0.3432	0.3678	0.3974	0.4134	0.3842	0.3836	0.4075	0.4131		Source of variation Variation Degrees of Variance F-Value Significance
1071.52	0.2906	0.3521	0.3925	0.4394	0.3426	0.3672	0.3968	0.4127	0.3836	0.383	0.4068	0.4125		freedom level (%)
1096.48	0.2901	0.3515	0.3918	0.4385	0.342	0.3667	0.3962	0.412	0.383	0.3824	0.4061	0.4118		____________________________________________________________________________________________
1122.02	0.2895	0.3508	0.391	0.4375	0.3414	0.3661	0.3956	0.4113	0.3824	0.3818	0.4054	0.4112		Explained by Regression 0.0443 2 0.022155 63.7603 0.0218
1148.15	0.2889	0.3502	0.3903	0.4366	0.3408	0.3655	0.395	0.4107	0.3818	0.3812	0.4047	0.4105		Unexplained (Error) 0.0021 6 0.000347
1174.9	0.2884	0.3495	0.3895	0.4357	0.3402	0.3649	0.3944	0.41	0.3812	0.3806	0.4041	0.4099		____________________________________________________________________________________________
1202.26	0.2878	0.3489	0.3888	0.4347	0.3396	0.3644	0.3938	0.4093	0.3806	0.38	0.4034	0.4092		Total 0.0457 8
1230.27	0.2873	0.3483	0.388	0.4338	0.339	0.3638	0.3932	0.4086	0.38	0.3795	0.4027	0.4086		____________________________________________________________________________________________
1258.93	0.2867	0.3476	0.3873	0.4328	0.3385	0.3632	0.3926	0.4079	0.3794	0.3789	0.402	0.408		Model: van Genuchten (1980)
1288.25	0.2862	0.347	0.3866	0.4319	0.3379	0.3627	0.392	0.4073	0.3788	0.3783	0.4013	0.4073		m: Dependent (Mualem, 1976) (m=1-1/n)
1318.26	0.2856	0.3464	0.3858	0.4309	0.3373	0.3621	0.3914	0.4066	0.3782	0.3777	0.4006	0.4067		Residual Soil Water Content: Regression value (restriction to positive value)
1348.96	0.2851	0.3457	0.3851	0.4299	0.3367	0.3616	0.3908	0.4059	0.3776	0.3772	0.3999	0.406		Saturated Soil Water Content: Extrapolated value < 1 (Jong-van-Lier and Dourado-Neto, 1993)
1380.38	0.2845	0.3451	0.3843	0.429	0.3361	0.361	0.3902	0.4053	0.377	0.3766	0.3993	0.4054		Parameters:
1412.54	0.284	0.3445	0.3836	0.428	0.3356	0.3605	0.3896	0.4046	0.3764	0.376	0.3986	0.4048		Alpha: 0.0180
1445.44	0.2835	0.3439	0.3829	0.427	0.335	0.3599	0.389	0.4039	0.3758	0.3755	0.3979	0.4041		m: 0.1300
1479.11	0.2829	0.3432	0.3822	0.4261	0.3344	0.3594	0.3884	0.4033	0.3752	0.3749	0.3972	0.4035		n: 1.1494
1513.56	0.2824	0.3426	0.3814	0.4251	0.3339	0.3588	0.3878	0.4026	0.3746	0.3743	0.3966	0.4029		Residual soil moisture: 0.197
1548.82	0.2819	0.342	0.3807	0.4241	0.3333	0.3583	0.3872	0.4019	0.374	0.3738	0.3959	0.4023		Saturated soil moisture: 0.524
1584.89	0.2814	0.3414	0.38	0.4231	0.3327	0.3577	0.3866	0.4013	0.3734	0.3732	0.3952	0.4016		Adjust coefficient: 0.956
1621.81	0.2809	0.3408	0.3793	0.4221	0.3322	0.3572	0.3861	0.4006	0.3729	0.3727	0.3946	0.401		Case: Iteractive method of Newton-Raphson
1659.59	0.2804	0.3402	0.3786	0.4212	0.3316	0.3566	0.3855	0.4	0.3723	0.3721	0.3939	0.4004		Adjust coefficient: 0.956
1698.24	0.2798	0.3396	0.3779	0.4202	0.3311	0.3561	0.3849	0.3993	0.3717	0.3715	0.3932	0.3998		AIC: Akaike Information Criterion (Hippel, 1981): -11.4871
1737.8	0.2793	0.339	0.3772	0.4192	0.3305	0.3556	0.3843	0.3986	0.3711	0.371	0.3926	0.3991		Curve: 9
1778.28	0.2788	0.3384	0.3764	0.4182	0.33	0.355	0.3837	0.398	0.3706	0.3704	0.3919	0.3985		___________________________________
1819.7	0.2783	0.3378	0.3757	0.4172	0.3294	0.3545	0.3832	0.3973	0.37	0.3699	0.3913	0.3979		Matric Soil Water Content
1862.09	0.2778	0.3372	0.375	0.4162	0.3289	0.354	0.3826	0.3967	0.3694	0.3693	0.3906	0.3973		Potential _______________________
1905.46	0.2773	0.3366	0.3743	0.4152	0.3283	0.3534	0.382	0.396	0.3688	0.3688	0.3899	0.3967		Measured Estimated
1949.84	0.2769	0.336	0.3736	0.4142	0.3278	0.3529	0.3815	0.3954	0.3683	0.3683	0.3893	0.3961		___________________________________
1995.26	0.2764	0.3354	0.3729	0.4132	0.3272	0.3524	0.3809	0.3947	0.3677	0.3677	0.3886	0.3955		0 0.524
2041.74	0.2759	0.3349	0.3723	0.4122	0.3267	0.3519	0.3803	0.3941	0.3671	0.3672	0.388	0.3949		30 0.492
2089.3	0.2754	0.3343	0.3716	0.4112	0.3262	0.3513	0.3798	0.3935	0.3666	0.3666	0.3873	0.3943		60 0.478
2137.96	0.2749	0.3337	0.3709	0.4102	0.3256	0.3508	0.3792	0.3928	0.366	0.3661	0.3867	0.3937		100 0.485
2187.76	0.2745	0.3331	0.3702	0.4092	0.3251	0.3503	0.3786	0.3922	0.3655	0.3656	0.3861	0.3931		330 0.434
2238.72	0.274	0.3326	0.3695	0.4083	0.3246	0.3498	0.3781	0.3915	0.3649	0.365	0.3854	0.3925		1000 0.432
2290.87	0.2735	0.332	0.3688	0.4073	0.3241	0.3493	0.3775	0.3909	0.3644	0.3645	0.3848	0.3919		5000 0.389
2344.23	0.273	0.3314	0.3681	0.4063	0.3235	0.3487	0.377	0.3903	0.3638	0.364	0.3841	0.3913		40000 0.304
2398.83	0.2726	0.3308	0.3675	0.4053	0.323	0.3482	0.3764	0.3896	0.3633	0.3634	0.3835	0.3907		60000 0.296
2454.71	0.2721	0.3303	0.3668	0.4043	0.3225	0.3477	0.3758	0.389	0.3627	0.3629	0.3829	0.3901		___________________________________
2511.89	0.2717	0.3297	0.3661	0.4033	0.322	0.3472	0.3753	0.3884	0.3622	0.3624	0.3823	0.3895
2570.4	0.2712	0.3292	0.3655	0.4023	0.3215	0.3467	0.3747	0.3877	0.3616	0.3619	0.3816	0.3889		ANOVA
2630.27	0.2708	0.3286	0.3648	0.4013	0.3209	0.3462	0.3742	0.3871	0.3611	0.3613	0.381	0.3883		____________________________________________________________________________________________
2691.53	0.2703	0.3281	0.3641	0.4003	0.3204	0.3457	0.3736	0.3865	0.3605	0.3608	0.3804	0.3877		Source of variation Variation Degrees of Variance F-Value Significance
2754.23	0.2699	0.3275	0.3635	0.3993	0.3199	0.3452	0.3731	0.3859	0.36	0.3603	0.3798	0.3871		freedom level (%)
2818.38	0.2694	0.327	0.3628	0.3983	0.3194	0.3447	0.3726	0.3852	0.3594	0.3598	0.3791	0.3865		____________________________________________________________________________________________
2884.03	0.269	0.3264	0.3622	0.3973	0.3189	0.3442	0.372	0.3846	0.3589	0.3593	0.3785	0.386		Explained by Regression 0.0515 2 0.025744 65.8465 0.0206
2951.21	0.2685	0.3259	0.3615	0.3963	0.3184	0.3437	0.3715	0.384	0.3584	0.3587	0.3779	0.3854		Unexplained (Error) 0.0023 6 0.000391
3019.95	0.2681	0.3253	0.3608	0.3954	0.3179	0.3432	0.3709	0.3834	0.3578	0.3582	0.3773	0.3848		____________________________________________________________________________________________
3090.3	0.2677	0.3248	0.3602	0.3944	0.3174	0.3427	0.3704	0.3828	0.3573	0.3577	0.3767	0.3842		Total 0.0534 8
3162.28	0.2672	0.3242	0.3595	0.3934	0.3169	0.3422	0.3699	0.3822	0.3568	0.3572	0.3761	0.3836		____________________________________________________________________________________________
3235.94	0.2668	0.3237	0.3589	0.3924	0.3164	0.3417	0.3693	0.3816	0.3563	0.3567	0.3754	0.3831		Model: van Genuchten (1980)
3311.31	0.2664	0.3232	0.3583	0.3914	0.3159	0.3412	0.3688	0.381	0.3557	0.3562	0.3748	0.3825		m: Dependent (Mualem, 1976) (m=1-1/n)
3388.44	0.266	0.3226	0.3576	0.3905	0.3154	0.3407	0.3683	0.3803	0.3552	0.3557	0.3742	0.3819		Residual Soil Water Content: Regression value (restriction to positive value)
3467.37	0.2655	0.3221	0.357	0.3895	0.315	0.3403	0.3677	0.3797	0.3547	0.3552	0.3736	0.3814		Saturated Soil Water Content: Extrapolated value < 1 (Jong-van-Lier and Dourado-Neto, 1993)
3548.13	0.2651	0.3216	0.3563	0.3885	0.3145	0.3398	0.3672	0.3791	0.3542	0.3547	0.373	0.3808		Parameters:
3630.78	0.2647	0.3211	0.3557	0.3875	0.314	0.3393	0.3667	0.3785	0.3536	0.3542	0.3724	0.3802		Alpha: 0.0017
3715.35	0.2643	0.3205	0.3551	0.3866	0.3135	0.3388	0.3662	0.3779	0.3531	0.3537	0.3718	0.3797		m: 0.1987
3801.89	0.2639	0.32	0.3545	0.3856	0.313	0.3383	0.3656	0.3773	0.3526	0.3532	0.3712	0.3791		n: 1.2480
3890.45	0.2635	0.3195	0.3538	0.3846	0.3126	0.3379	0.3651	0.3767	0.3521	0.3527	0.3706	0.3785		Residual soil moisture: 0.200
3981.07	0.2631	0.319	0.3532	0.3837	0.3121	0.3374	0.3646	0.3761	0.3516	0.3522	0.3701	0.378		Saturated soil moisture: 0.499
4073.8	0.2627	0.3185	0.3526	0.3827	0.3116	0.3369	0.3641	0.3756	0.3511	0.3517	0.3695	0.3774		Adjust coefficient: 0.964
4168.69	0.2623	0.318	0.352	0.3818	0.3111	0.3364	0.3636	0.375	0.3506	0.3512	0.3689	0.3769		Case: Iteractive method of Newton-Raphson
4265.8	0.2619	0.3175	0.3514	0.3808	0.3107	0.336	0.363	0.3744	0.3501	0.3507	0.3683	0.3763		Adjust coefficient: 0.964
4365.16	0.2615	0.3169	0.3507	0.3799	0.3102	0.3355	0.3625	0.3738	0.3495	0.3502	0.3677	0.3758		AIC: Akaike Information Criterion (Hippel, 1981): -12.1913
4466.84	0.2611	0.3164	0.3501	0.3789	0.3097	0.335	0.362	0.3732	0.349	0.3498	0.3671	0.3752		Curve: 10
4570.88	0.2607	0.3159	0.3495	0.378	0.3093	0.3346	0.3615	0.3726	0.3485	0.3493	0.3665	0.3747		___________________________________
4677.35	0.2603	0.3154	0.3489	0.377	0.3088	0.3341	0.361	0.372	0.348	0.3488	0.366	0.3741		Matric Soil Water Content
4786.3	0.2599	0.3149	0.3483	0.3761	0.3083	0.3336	0.3605	0.3715	0.3475	0.3483	0.3654	0.3736		Potential _______________________
4897.79	0.2595	0.3144	0.3477	0.3752	0.3079	0.3332	0.36	0.3709	0.347	0.3478	0.3648	0.373		Measured Estimated
5011.87	0.2592	0.314	0.3471	0.3742	0.3074	0.3327	0.3595	0.3703	0.3466	0.3474	0.3642	0.3725		___________________________________
5128.61	0.2588	0.3135	0.3465	0.3733	0.307	0.3323	0.359	0.3697	0.3461	0.3469	0.3637	0.372		0 0.499
5248.07	0.2584	0.313	0.3459	0.3724	0.3065	0.3318	0.3585	0.3691	0.3456	0.3464	0.3631	0.3714		30 0.490
5370.32	0.258	0.3125	0.3453	0.3715	0.3061	0.3314	0.358	0.3686	0.3451	0.3459	0.3625	0.3709		60 0.486
5495.41	0.2577	0.312	0.3447	0.3705	0.3056	0.3309	0.3575	0.368	0.3446	0.3455	0.362	0.3703		100 0.496
5623.41	0.2573	0.3115	0.3441	0.3696	0.3052	0.3304	0.357	0.3674	0.3441	0.345	0.3614	0.3698		330 0.447
5754.4	0.2569	0.311	0.3436	0.3687	0.3047	0.33	0.3565	0.3669	0.3436	0.3445	0.3608	0.3693		1000 0.441
5888.44	0.2566	0.3106	0.343	0.3678	0.3043	0.3295	0.356	0.3663	0.3431	0.3441	0.3603	0.3687		5000 0.402
6025.6	0.2562	0.3101	0.3424	0.3669	0.3039	0.3291	0.3555	0.3657	0.3426	0.3436	0.3597	0.3682		40000 0.298
6165.95	0.2558	0.3096	0.3418	0.366	0.3034	0.3287	0.355	0.3652	0.3422	0.3431	0.3592	0.3677		60000 0.286
6309.57	0.2555	0.3091	0.3412	0.3651	0.303	0.3282	0.3545	0.3646	0.3417	0.3427	0.3586	0.3672		___________________________________
6456.54	0.2551	0.3087	0.3407	0.3642	0.3025	0.3278	0.354	0.3641	0.3412	0.3422	0.3581	0.3666
6606.93	0.2548	0.3082	0.3401	0.3633	0.3021	0.3273	0.3535	0.3635	0.3407	0.3417	0.3575	0.3661		ANOVA
6760.83	0.2544	0.3077	0.3395	0.3624	0.3017	0.3269	0.353	0.363	0.3403	0.3413	0.357	0.3656		____________________________________________________________________________________________
6918.31	0.2541	0.3072	0.3389	0.3616	0.3013	0.3265	0.3526	0.3624	0.3398	0.3408	0.3564	0.3651		Source of variation Variation Degrees of Variance F-Value Significance
7079.46	0.2537	0.3068	0.3384	0.3607	0.3008	0.326	0.3521	0.3619	0.3393	0.3404	0.3559	0.3646		freedom level (%)
7244.36	0.2534	0.3063	0.3378	0.3598	0.3004	0.3256	0.3516	0.3613	0.3388	0.3399	0.3553	0.364		____________________________________________________________________________________________
7413.1	0.2531	0.3059	0.3373	0.3589	0.3	0.3251	0.3511	0.3608	0.3384	0.3395	0.3548	0.3635		Explained by Regression 0.0569 2 0.028457 87.1527 0.0128
7585.78	0.2527	0.3054	0.3367	0.3581	0.2996	0.3247	0.3506	0.3602	0.3379	0.339	0.3542	0.363		Unexplained (Error) 0.0020 6 0.000327
7762.47	0.2524	0.3049	0.3361	0.3572	0.2991	0.3243	0.3502	0.3597	0.3374	0.3386	0.3537	0.3625		____________________________________________________________________________________________
7943.28	0.252	0.3045	0.3356	0.3563	0.2987	0.3239	0.3497	0.3591	0.337	0.3381	0.3532	0.362		Total 0.0551 8
8128.31	0.2517	0.304	0.335	0.3555	0.2983	0.3234	0.3492	0.3586	0.3365	0.3377	0.3526	0.3615		____________________________________________________________________________________________
8317.64	0.2514	0.3036	0.3345	0.3546	0.2979	0.323	0.3487	0.3581	0.3361	0.3372	0.3521	0.361		Model: van Genuchten (1980)
8511.38	0.251	0.3031	0.3339	0.3538	0.2975	0.3226	0.3483	0.3575	0.3356	0.3368	0.3516	0.3605		m: Dependent (Mualem, 1976) (m=1-1/n)
8709.64	0.2507	0.3027	0.3334	0.3529	0.2971	0.3222	0.3478	0.357	0.3351	0.3363	0.351	0.36		Residual Soil Water Content: Regression value (restriction to positive value)
8912.51	0.2504	0.3023	0.3328	0.3521	0.2966	0.3217	0.3473	0.3565	0.3347	0.3359	0.3505	0.3595		Saturated Soil Water Content: Extrapolated value < 1 (Jong-van-Lier and Dourado-Neto, 1993)
9120.11	0.2501	0.3018	0.3323	0.3513	0.2962	0.3213	0.3469	0.3559	0.3342	0.3355	0.35	0.359		Parameters:
9332.54	0.2497	0.3014	0.3318	0.3504	0.2958	0.3209	0.3464	0.3554	0.3338	0.335	0.3495	0.3585		Alpha: 0.0102
9549.93	0.2494	0.3009	0.3312	0.3496	0.2954	0.3205	0.3459	0.3549	0.3333	0.3346	0.3489	0.358		m: 0.1293
9772.37	0.2491	0.3005	0.3307	0.3488	0.295	0.3201	0.3455	0.3543	0.3329	0.3341	0.3484	0.3575		n: 1.1485
10000	0.2488	0.3001	0.3302	0.3479	0.2946	0.3196	0.345	0.3538	0.3324	0.3337	0.3479	0.357		Residual soil moisture: 0.200
10232.9	0.2485	0.2996	0.3296	0.3471	0.2942	0.3192	0.3446	0.3533	0.332	0.3333	0.3474	0.3565		Saturated soil moisture: 0.505
10471.3	0.2482	0.2992	0.3291	0.3463	0.2938	0.3188	0.3441	0.3528	0.3315	0.3329	0.3469	0.356		Adjust coefficient: 0.945
10715.2	0.2479	0.2988	0.3286	0.3455	0.2934	0.3184	0.3437	0.3523	0.3311	0.3324	0.3464	0.3555		Case: Iteractive method of Newton-Raphson
10964.8	0.2475	0.2983	0.328	0.3447	0.293	0.318	0.3432	0.3517	0.3306	0.332	0.3458	0.355		Adjust coefficient: 0.945
11220.2	0.2472	0.2979	0.3275	0.3439	0.2926	0.3176	0.3427	0.3512	0.3302	0.3316	0.3453	0.3545		AIC: Akaike Information Criterion (Hippel, 1981): -11.4088
11481.5	0.2469	0.2975	0.327	0.3431	0.2923	0.3172	0.3423	0.3507	0.3298	0.3311	0.3448	0.354		Curve: 11
11749	0.2466	0.2971	0.3265	0.3423	0.2919	0.3168	0.3418	0.3502	0.3293	0.3307	0.3443	0.3535		___________________________________
12022.6	0.2463	0.2966	0.326	0.3415	0.2915	0.3164	0.3414	0.3497	0.3289	0.3303	0.3438	0.3531		Matric Soil Water Content
12302.7	0.246	0.2962	0.3254	0.3407	0.2911	0.316	0.3409	0.3492	0.3285	0.3299	0.3433	0.3526		Potential _______________________
12589.3	0.2457	0.2958	0.3249	0.3399	0.2907	0.3156	0.3405	0.3487	0.328	0.3295	0.3428	0.3521		Measured Estimated
12882.5	0.2454	0.2954	0.3244	0.3392	0.2903	0.3152	0.3401	0.3482	0.3276	0.329	0.3423	0.3516		___________________________________
13182.6	0.2451	0.295	0.3239	0.3384	0.2899	0.3148	0.3396	0.3477	0.3272	0.3286	0.3418	0.3511		0 0.505
13489.6	0.2449	0.2946	0.3234	0.3376	0.2896	0.3144	0.3392	0.3472	0.3267	0.3282	0.3413	0.3507		30 0.482
13803.8	0.2446	0.2942	0.3229	0.3368	0.2892	0.314	0.3387	0.3467	0.3263	0.3278	0.3408	0.3502		60 0.477
14125.4	0.2443	0.2937	0.3224	0.3361	0.2888	0.3136	0.3383	0.3462	0.3259	0.3274	0.3403	0.3497		100 0.473
14454.4	0.244	0.2933	0.3219	0.3353	0.2884	0.3132	0.3379	0.3457	0.3255	0.327	0.3398	0.3493		330 0.435
14791.1	0.2437	0.2929	0.3214	0.3346	0.2881	0.3128	0.3374	0.3452	0.325	0.3265	0.3393	0.3488		1000 0.430
15135.6	0.2434	0.2925	0.3209	0.3338	0.2877	0.3124	0.337	0.3447	0.3246	0.3261	0.3389	0.3483		5000 0.404
15488.2	0.2431	0.2921	0.3204	0.3331	0.2873	0.312	0.3366	0.3442	0.3242	0.3257	0.3384	0.3479		40000 0.312
15848.9	0.2429	0.2917	0.3199	0.3323	0.2869	0.3117	0.3361	0.3437	0.3238	0.3253	0.3379	0.3474		60000 0.300
16218.1	0.2426	0.2913	0.3194	0.3316	0.2866	0.3113	0.3357	0.3432	0.3234	0.3249	0.3374	0.3469		___________________________________
16595.9	0.2423	0.2909	0.3189	0.3308	0.2862	0.3109	0.3353	0.3427	0.3229	0.3245	0.3369	0.3465
16982.4	0.242	0.2905	0.3185	0.3301	0.2858	0.3105	0.3348	0.3422	0.3225	0.3241	0.3364	0.346		ANOVA
17378	0.2418	0.2902	0.318	0.3294	0.2855	0.3101	0.3344	0.3417	0.3221	0.3237	0.336	0.3455		____________________________________________________________________________________________
17782.8	0.2415	0.2898	0.3175	0.3286	0.2851	0.3097	0.334	0.3413	0.3217	0.3233	0.3355	0.3451		Source of variation Variation Degrees of Variance F-Value Significance
18197	0.2412	0.2894	0.317	0.3279	0.2848	0.3094	0.3336	0.3408	0.3213	0.3229	0.335	0.3446		freedom level (%)
18620.9	0.241	0.289	0.3165	0.3272	0.2844	0.309	0.3331	0.3403	0.3209	0.3225	0.3345	0.3442		____________________________________________________________________________________________
19054.6	0.2407	0.2886	0.3161	0.3265	0.284	0.3086	0.3327	0.3398	0.3205	0.3221	0.3341	0.3437		Explained by Regression 0.0435 2 0.021746 54.5160 0.0291
19498.4	0.2404	0.2882	0.3156	0.3258	0.2837	0.3082	0.3323	0.3393	0.3201	0.3217	0.3336	0.3433		Unexplained (Error) 0.0024 6 0.000399
19952.6	0.2402	0.2878	0.3151	0.3251	0.2833	0.3079	0.3319	0.3389	0.3197	0.3213	0.3331	0.3428		____________________________________________________________________________________________
20417.4	0.2399	0.2874	0.3146	0.3244	0.283	0.3075	0.3315	0.3384	0.3192	0.3209	0.3327	0.3424		Total 0.0436 8
20893	0.2397	0.2871	0.3142	0.3237	0.2826	0.3071	0.331	0.3379	0.3188	0.3205	0.3322	0.3419		____________________________________________________________________________________________
21379.6	0.2394	0.2867	0.3137	0.323	0.2823	0.3067	0.3306	0.3375	0.3184	0.3202	0.3317	0.3415		Model: van Genuchten (1980)
21877.6	0.2391	0.2863	0.3132	0.3223	0.2819	0.3064	0.3302	0.337	0.318	0.3198	0.3313	0.341		m: Dependent (Mualem, 1976) (m=1-1/n)
22387.2	0.2389	0.2859	0.3128	0.3216	0.2816	0.306	0.3298	0.3365	0.3176	0.3194	0.3308	0.3406		Residual Soil Water Content: Regression value (restriction to positive value)
22908.7	0.2386	0.2856	0.3123	0.3209	0.2812	0.3056	0.3294	0.3361	0.3172	0.319	0.3303	0.3401		Saturated Soil Water Content: Extrapolated value < 1 (Jong-van-Lier and Dourado-Neto, 1993)
23442.3	0.2384	0.2852	0.3119	0.3202	0.2809	0.3053	0.329	0.3356	0.3169	0.3186	0.3299	0.3397		Parameters:
23988.3	0.2381	0.2848	0.3114	0.3196	0.2806	0.3049	0.3286	0.3351	0.3165	0.3182	0.3294	0.3393		Alpha: 0.0211
24547.1	0.2379	0.2845	0.3109	0.3189	0.2802	0.3046	0.3282	0.3347	0.3161	0.3178	0.329	0.3388		m: 0.1205
25118.9	0.2376	0.2841	0.3105	0.3182	0.2799	0.3042	0.3278	0.3342	0.3157	0.3175	0.3285	0.3384		n: 1.1370
25704	0.2374	0.2837	0.31	0.3175	0.2795	0.3038	0.3273	0.3338	0.3153	0.3171	0.3281	0.3379		Residual soil moisture: 0.200
26302.7	0.2371	0.2834	0.3096	0.3169	0.2792	0.3035	0.3269	0.3333	0.3149	0.3167	0.3276	0.3375		Saturated soil moisture: 0.526
26915.3	0.2369	0.283	0.3091	0.3162	0.2789	0.3031	0.3265	0.3328	0.3145	0.3163	0.3272	0.3371		Adjust coefficient: 0.920
27542.3	0.2367	0.2826	0.3087	0.3156	0.2785	0.3028	0.3261	0.3324	0.3141	0.3159	0.3267	0.3367		Case: Iteractive method of Newton-Raphson
28183.8	0.2364	0.2823	0.3083	0.3149	0.2782	0.3024	0.3257	0.3319	0.3137	0.3156	0.3263	0.3362		Adjust coefficient: 0.920
28840.3	0.2362	0.2819	0.3078	0.3143	0.2779	0.302	0.3253	0.3315	0.3134	0.3152	0.3258	0.3358		AIC: Akaike Information Criterion (Hippel, 1981): -9.3502
29512.1	0.236	0.2816	0.3074	0.3136	0.2776	0.3017	0.3249	0.331	0.313	0.3148	0.3254	0.3354		Curve: 12
30199.5	0.2357	0.2812	0.3069	0.313	0.2772	0.3013	0.3246	0.3306	0.3126	0.3145	0.325	0.3349		___________________________________
30903	0.2355	0.2809	0.3065	0.3123	0.2769	0.301	0.3242	0.3301	0.3122	0.3141	0.3245	0.3345		Matric Soil Water Content
31622.8	0.2353	0.2805	0.3061	0.3117	0.2766	0.3006	0.3238	0.3297	0.3118	0.3137	0.3241	0.3341		Potential _______________________
32359.4	0.235	0.2801	0.3056	0.3111	0.2762	0.3003	0.3234	0.3293	0.3114	0.3133	0.3236	0.3337		Measured Estimated
33113.1	0.2348	0.2798	0.3052	0.3104	0.2759	0.3	0.323	0.3288	0.3111	0.313	0.3232	0.3332		___________________________________
33884.4	0.2346	0.2795	0.3048	0.3098	0.2756	0.2996	0.3226	0.3284	0.3107	0.3126	0.3228	0.3328		0 0.526
34673.7	0.2343	0.2791	0.3043	0.3092	0.2753	0.2993	0.3222	0.3279	0.3103	0.3123	0.3223	0.3324		30 0.496
35481.3	0.2341	0.2788	0.3039	0.3086	0.275	0.2989	0.3218	0.3275	0.31	0.3119	0.3219	0.332		60 0.486
36307.8	0.2339	0.2784	0.3035	0.308	0.2747	0.2986	0.3214	0.3271	0.3096	0.3115	0.3215	0.3316		100 0.468
37153.5	0.2337	0.2781	0.3031	0.3074	0.2743	0.2982	0.321	0.3266	0.3092	0.3112	0.3211	0.3312		330 0.442
38018.9	0.2335	0.2777	0.3026	0.3067	0.274	0.2979	0.3207	0.3262	0.3088	0.3108	0.3206	0.3307		1000 0.437
38904.5	0.2332	0.2774	0.3022	0.3061	0.2737	0.2976	0.3203	0.3258	0.3085	0.3104	0.3202	0.3303		5000 0.417
39810.7	0.233	0.2771	0.3018	0.3055	0.2734	0.2972	0.3199	0.3253	0.3081	0.3101	0.3198	0.3299		40000 0.307
40738	0.2328	0.2767	0.3014	0.3049	0.2731	0.2969	0.3195	0.3249	0.3077	0.3097	0.3194	0.3295		60000 0.299
41686.9	0.2326	0.2764	0.301	0.3043	0.2728	0.2966	0.3191	0.3245	0.3074	0.3094	0.3189	0.3291		___________________________________
42658	0.2324	0.2761	0.3006	0.3038	0.2725	0.2962	0.3188	0.3241	0.307	0.309	0.3185	0.3287
43651.6	0.2322	0.2757	0.3001	0.3032	0.2722	0.2959	0.3184	0.3236	0.3067	0.3087	0.3181	0.3283		ANOVA
44668.4	0.2319	0.2754	0.2997	0.3026	0.2719	0.2956	0.318	0.3232	0.3063	0.3083	0.3177	0.3279		____________________________________________________________________________________________
45708.8	0.2317	0.2751	0.2993	0.302	0.2716	0.2952	0.3176	0.3228	0.3059	0.308	0.3173	0.3275		Source of variation Variation Degrees of Variance F-Value Significance
46773.5	0.2315	0.2747	0.2989	0.3014	0.2713	0.2949	0.3173	0.3224	0.3056	0.3076	0.3169	0.3271		freedom level (%)
47863	0.2313	0.2744	0.2985	0.3008	0.271	0.2946	0.3169	0.322	0.3052	0.3073	0.3165	0.3267		____________________________________________________________________________________________
48977.9	0.2311	0.2741	0.2981	0.3003	0.2707	0.2942	0.3165	0.3216	0.3049	0.3069	0.316	0.3263		Explained by Regression 0.0477 2 0.023857 35.3216 0.0683
50118.7	0.2309	0.2738	0.2977	0.2997	0.2704	0.2939	0.3162	0.3211	0.3045	0.3066	0.3156	0.3259		Unexplained (Error) 0.0041 6 0.000675
51286.1	0.2307	0.2734	0.2973	0.2991	0.2701	0.2936	0.3158	0.3207	0.3042	0.3062	0.3152	0.3255		____________________________________________________________________________________________
52480.7	0.2305	0.2731	0.2969	0.2986	0.2698	0.2933	0.3154	0.3203	0.3038	0.3059	0.3148	0.3251		Total 0.0508 8
53703.2	0.2303	0.2728	0.2965	0.298	0.2695	0.293	0.3151	0.3199	0.3035	0.3055	0.3144	0.3247		____________________________________________________________________________________________
54954.1	0.2301	0.2725	0.2961	0.2975	0.2692	0.2926	0.3147	0.3195	0.3031	0.3052	0.314	0.3243
56234.1	0.2299	0.2722	0.2957	0.2969	0.2689	0.2923	0.3143	0.3191	0.3028	0.3049	0.3136	0.3239
57544	0.2297	0.2719	0.2953	0.2964	0.2686	0.292	0.314	0.3187	0.3024	0.3045	0.3132	0.3235
58884.4	0.2295	0.2715	0.2949	0.2958	0.2683	0.2917	0.3136	0.3183	0.3021	0.3042	0.3128	0.3231
60256	0.2293	0.2712	0.2946	0.2953	0.268	0.2914	0.3132	0.3179	0.3017	0.3039	0.3124	0.3228
61659.5	0.2291	0.2709	0.2942	0.2947	0.2677	0.291	0.3129	0.3175	0.3014	0.3035	0.312	0.3224
63095.7	0.2289	0.2706	0.2938	0.2942	0.2674	0.2907	0.3125	0.3171	0.301	0.3032	0.3116	0.322
64565.4	0.2287	0.2703	0.2934	0.2937	0.2672	0.2904	0.3122	0.3167	0.3007	0.3028	0.3112	0.3216
66069.3	0.2286	0.27	0.293	0.2931	0.2669	0.2901	0.3118	0.3163	0.3004	0.3025	0.3108	0.3212
67608.3	0.2284	0.2697	0.2926	0.2926	0.2666	0.2898	0.3115	0.3159	0.3	0.3022	0.3104	0.3208
69183.1	0.2282	0.2694	0.2923	0.2921	0.2663	0.2895	0.3111	0.3155	0.2997	0.3019	0.3101	0.3205
70794.6	0.228	0.2691	0.2919	0.2915	0.266	0.2892	0.3108	0.3151	0.2993	0.3015	0.3097	0.3201
72443.6	0.2278	0.2688	0.2915	0.291	0.2657	0.2889	0.3104	0.3147	0.299	0.3012	0.3093	0.3197
74131	0.2276	0.2685	0.2911	0.2905	0.2655	0.2886	0.3101	0.3143	0.2987	0.3009	0.3089	0.3193
75857.8	0.2274	0.2682	0.2908	0.29	0.2652	0.2883	0.3097	0.3139	0.2983	0.3005	0.3085	0.3189
77624.7	0.2273	0.2679	0.2904	0.2895	0.2649	0.2879	0.3094	0.3135	0.298	0.3002	0.3081	0.3186
79432.8	0.2271	0.2676	0.29	0.289	0.2646	0.2876	0.309	0.3131	0.2977	0.2999	0.3077	0.3182
81283.1	0.2269	0.2673	0.2896	0.2885	0.2644	0.2873	0.3087	0.3128	0.2973	0.2996	0.3074	0.3178
83176.4	0.2267	0.267	0.2893	0.288	0.2641	0.287	0.3083	0.3124	0.297	0.2992	0.307	0.3175
85113.8	0.2265	0.2667	0.2889	0.2875	0.2638	0.2867	0.308	0.312	0.2967	0.2989	0.3066	0.3171
87096.4	0.2264	0.2664	0.2886	0.287	0.2636	0.2864	0.3076	0.3116	0.2964	0.2986	0.3062	0.3167
89125.1	0.2262	0.2661	0.2882	0.2865	0.2633	0.2861	0.3073	0.3112	0.296	0.2983	0.3059	0.3163
91201.1	0.226	0.2658	0.2878	0.286	0.263	0.2858	0.307	0.3108	0.2957	0.298	0.3055	0.316
93325.4	0.2258	0.2655	0.2875	0.2855	0.2628	0.2855	0.3066	0.3105	0.2954	0.2976	0.3051	0.3156
95499.3	0.2257	0.2653	0.2871	0.285	0.2625	0.2853	0.3063	0.3101	0.2951	0.2973	0.3047	0.3153
97723.7	0.2255	0.265	0.2868	0.2845	0.2622	0.285	0.3059	0.3097	0.2947	0.297	0.3044	0.3149
			Frequency of pore class (∂θ/α ∂Ψ kPa-1)
	Frequency of pore class (∂θ/α ∂Ψ kPa-1)
Depth	0-10 cm				10-20 cm				20-30 cm
Treatment / Pore size (µm)	MTC	NT	NTC4	NTC8	MTC	NT	NTC4	NTC8	MTC	NT	NTC4	NTC8
3059.15	0.1117	0.0352	0.0031978	0.00025787	0.053	0.026	0.0063303	0.0023183	0.0138	0.0236	0.0047598	0.0054655
2989.51	0.1119	0.0353	0.0032104	0.00025935	0.0531	0.0261	0.0063479	0.0023259	0.0139	0.0237	0.0047748	0.0054808
2921.46	0.1122	0.0354	0.003223	0.00026083	0.0532	0.0261	0.0063654	0.0023335	0.0139	0.0237	0.0047898	0.0054961
2854.96	0.1124	0.0355	0.0032356	0.00026232	0.0533	0.0262	0.0063829	0.0023412	0.0139	0.0238	0.0048049	0.0055114
2789.98	0.1126	0.0356	0.0032483	0.00026382	0.0533	0.0262	0.0064004	0.0023488	0.014	0.0238	0.0048199	0.0055267
2726.47	0.1129	0.0357	0.003261	0.00026532	0.0534	0.0263	0.0064179	0.0023564	0.014	0.0238	0.004835	0.0055419
2664.41	0.1131	0.0358	0.0032737	0.00026684	0.0535	0.0263	0.0064353	0.0023641	0.014	0.0239	0.00485	0.0055572
2603.76	0.1133	0.0358	0.0032865	0.00026836	0.0535	0.0263	0.0064526	0.0023718	0.0141	0.0239	0.0048651	0.0055724
2544.49	0.1134	0.0359	0.0032993	0.0002699	0.0536	0.0264	0.00647	0.0023795	0.0141	0.024	0.0048802	0.0055876
2486.57	0.1136	0.036	0.0033121	0.00027144	0.0537	0.0264	0.0064873	0.0023872	0.0141	0.024	0.0048952	0.0056028
2429.97	0.1137	0.0361	0.003325	0.00027299	0.0537	0.0265	0.0065045	0.0023949	0.0142	0.024	0.0049103	0.005618
2374.66	0.1139	0.0361	0.0033378	0.00027455	0.0538	0.0265	0.0065217	0.0024026	0.0142	0.0241	0.0049254	0.0056331
2320.6	0.114	0.0362	0.0033507	0.00027612	0.0538	0.0265	0.0065389	0.0024103	0.0142	0.0241	0.0049404	0.0056483
2267.78	0.1141	0.0363	0.0033637	0.00027769	0.0539	0.0266	0.006556	0.0024181	0.0143	0.0241	0.0049555	0.0056634
2216.16	0.1142	0.0364	0.0033766	0.00027928	0.0539	0.0266	0.006573	0.0024259	0.0143	0.0242	0.0049705	0.0056784
2165.71	0.1143	0.0364	0.0033896	0.00028087	0.0539	0.0266	0.00659	0.0024336	0.0143	0.0242	0.0049856	0.0056934
2116.41	0.1143	0.0365	0.0034026	0.00028247	0.0539	0.0267	0.006607	0.0024414	0.0144	0.0242	0.0050006	0.0057084
2068.24	0.1144	0.0366	0.0034157	0.00028409	0.054	0.0267	0.0066238	0.0024492	0.0144	0.0242	0.0050156	0.0057234
2021.16	0.1144	0.0366	0.0034287	0.00028571	0.054	0.0267	0.0066406	0.002457	0.0144	0.0243	0.0050307	0.0057383
1975.15	0.1144	0.0367	0.0034418	0.00028734	0.054	0.0268	0.0066573	0.0024648	0.0144	0.0243	0.0050457	0.0057531
1930.19	0.1144	0.0367	0.0034549	0.00028898	0.054	0.0268	0.006674	0.0024727	0.0145	0.0243	0.0050606	0.005768
1886.26	0.1144	0.0368	0.0034681	0.00029063	0.054	0.0268	0.0066905	0.0024805	0.0145	0.0243	0.0050756	0.0057827
1843.32	0.1144	0.0368	0.0034812	0.00029229	0.054	0.0268	0.006707	0.0024883	0.0145	0.0243	0.0050905	0.0057974
1801.36	0.1143	0.0369	0.0034944	0.00029395	0.054	0.0268	0.0067234	0.0024962	0.0146	0.0244	0.0051054	0.0058121
1760.36	0.1142	0.0369	0.0035076	0.00029563	0.054	0.0269	0.0067397	0.002504	0.0146	0.0244	0.0051203	0.0058267
1720.29	0.1141	0.037	0.0035208	0.00029731	0.054	0.0269	0.0067559	0.0025119	0.0146	0.0244	0.0051352	0.0058412
1681.13	0.114	0.037	0.003534	0.00029901	0.0539	0.0269	0.0067719	0.0025198	0.0146	0.0244	0.00515	0.0058557
1642.86	0.1139	0.0371	0.0035472	0.00030072	0.0539	0.0269	0.0067879	0.0025276	0.0147	0.0244	0.0051648	0.0058701
1605.46	0.1138	0.0371	0.0035605	0.00030243	0.0539	0.0269	0.0068038	0.0025355	0.0147	0.0244	0.0051796	0.0058844
1568.92	0.1136	0.0371	0.0035738	0.00030415	0.0538	0.0269	0.0068196	0.0025434	0.0147	0.0244	0.0051943	0.0058987
1533.21	0.1134	0.0371	0.003587	0.00030589	0.0538	0.0269	0.0068352	0.0025513	0.0147	0.0244	0.005209	0.0059129
1498.31	0.1132	0.0372	0.0036003	0.00030763	0.0537	0.0269	0.0068507	0.0025591	0.0148	0.0244	0.0052236	0.005927
1464.2	0.113	0.0372	0.0036136	0.00030938	0.0536	0.0269	0.0068661	0.002567	0.0148	0.0245	0.0052382	0.005941
1430.87	0.1127	0.0372	0.0036269	0.00031114	0.0536	0.0269	0.0068814	0.0025749	0.0148	0.0245	0.0052527	0.0059549
1398.3	0.1124	0.0372	0.0036402	0.00031292	0.0535	0.0269	0.0068965	0.0025828	0.0148	0.0245	0.0052672	0.0059688
1366.47	0.1121	0.0372	0.0036536	0.0003147	0.0534	0.0269	0.0069114	0.0025907	0.0148	0.0245	0.0052817	0.0059825
1335.37	0.1118	0.0372	0.0036669	0.00031649	0.0533	0.0269	0.0069262	0.0025986	0.0149	0.0244	0.0052961	0.0059962
1304.97	0.1115	0.0373	0.0036802	0.00031829	0.0532	0.0269	0.0069409	0.0026065	0.0149	0.0244	0.0053104	0.0060097
1275.27	0.1111	0.0373	0.0036935	0.0003201	0.0531	0.0269	0.0069554	0.0026143	0.0149	0.0244	0.0053246	0.0060231
1246.24	0.1108	0.0372	0.0037068	0.00032193	0.053	0.0269	0.0069697	0.0026222	0.0149	0.0244	0.0053388	0.0060365
1217.87	0.1104	0.0372	0.0037202	0.00032376	0.0529	0.0269	0.0069839	0.0026301	0.0149	0.0244	0.0053529	0.0060497
1190.15	0.1099	0.0372	0.0037335	0.0003256	0.0528	0.0269	0.0069978	0.0026379	0.015	0.0244	0.005367	0.0060627
1163.06	0.1095	0.0372	0.0037468	0.00032745	0.0526	0.0268	0.0070116	0.0026458	0.015	0.0244	0.0053809	0.0060757
1136.58	0.109	0.0372	0.0037601	0.00032931	0.0525	0.0268	0.0070252	0.0026536	0.015	0.0244	0.0053948	0.0060885
1110.71	0.1085	0.0372	0.0037734	0.00033119	0.0523	0.0268	0.0070386	0.0026615	0.015	0.0243	0.0054086	0.0061012
1085.43	0.108	0.0371	0.0037867	0.00033307	0.0522	0.0268	0.0070518	0.0026693	0.015	0.0243	0.0054223	0.0061137
1060.72	0.1075	0.0371	0.0037999	0.00033496	0.052	0.0267	0.0070647	0.0026771	0.015	0.0243	0.0054359	0.0061261
1036.57	0.107	0.0371	0.0038132	0.00033686	0.0518	0.0267	0.0070775	0.0026849	0.015	0.0243	0.0054494	0.0061384
1012.98	0.1064	0.037	0.0038264	0.00033878	0.0517	0.0267	0.00709	0.0026927	0.015	0.0242	0.0054628	0.0061504
989.921	0.1058	0.037	0.0038396	0.0003407	0.0515	0.0266	0.0071023	0.0027005	0.015	0.0242	0.0054762	0.0061624
967.388	0.1052	0.0369	0.0038528	0.00034264	0.0513	0.0266	0.0071143	0.0027083	0.015	0.0242	0.0054893	0.0061741
945.367	0.1046	0.0369	0.003866	0.00034458	0.0511	0.0265	0.0071261	0.002716	0.0151	0.0241	0.0055024	0.0061857
923.848	0.1039	0.0368	0.0038791	0.00034654	0.0509	0.0265	0.0071376	0.0027238	0.0151	0.0241	0.0055154	0.0061971
902.819	0.1032	0.0368	0.0038923	0.0003485	0.0507	0.0264	0.0071489	0.0027315	0.0151	0.024	0.0055282	0.0062083
882.268	0.1025	0.0367	0.0039053	0.00035048	0.0504	0.0264	0.0071599	0.0027392	0.0151	0.024	0.0055409	0.0062194
862.185	0.1018	0.0366	0.0039184	0.00035247	0.0502	0.0263	0.0071706	0.0027468	0.0151	0.024	0.0055535	0.0062302
842.559	0.1011	0.0366	0.0039314	0.00035447	0.05	0.0262	0.007181	0.0027545	0.0151	0.0239	0.0055659	0.0062408
823.38	0.1003	0.0365	0.0039443	0.00035647	0.0497	0.0262	0.0071911	0.0027621	0.0151	0.0239	0.0055782	0.0062512
804.638	0.0996	0.0364	0.0039573	0.00035849	0.0495	0.0261	0.0072009	0.0027697	0.0151	0.0238	0.0055903	0.0062614
786.322	0.0988	0.0363	0.0039701	0.00036052	0.0492	0.026	0.0072104	0.0027773	0.0151	0.0237	0.0056023	0.0062714
768.423	0.098	0.0362	0.003983	0.00036256	0.0489	0.026	0.0072196	0.0027848	0.0151	0.0237	0.0056141	0.0062812
750.932	0.0971	0.0361	0.0039958	0.00036462	0.0487	0.0259	0.0072284	0.0027923	0.0151	0.0236	0.0056258	0.0062907
733.839	0.0963	0.036	0.0040085	0.00036668	0.0484	0.0258	0.0072369	0.0027998	0.015	0.0235	0.0056373	0.0062999
717.134	0.0954	0.0359	0.0040211	0.00036875	0.0481	0.0257	0.0072451	0.0028072	0.015	0.0235	0.0056486	0.0063089
700.811	0.0945	0.0358	0.0040337	0.00037084	0.0478	0.0256	0.0072528	0.0028146	0.015	0.0234	0.0056597	0.0063177
684.858	0.0937	0.0356	0.0040463	0.00037293	0.0475	0.0255	0.0072602	0.002822	0.015	0.0233	0.0056706	0.0063262
669.269	0.0927	0.0355	0.0040587	0.00037504	0.0472	0.0255	0.0072673	0.0028293	0.015	0.0233	0.0056813	0.0063344
654.034	0.0918	0.0354	0.0040711	0.00037716	0.0468	0.0254	0.0072739	0.0028366	0.015	0.0232	0.0056919	0.0063423
639.147	0.0909	0.0352	0.0040834	0.00037929	0.0465	0.0253	0.0072801	0.0028438	0.015	0.0231	0.0057022	0.00635
624.598	0.0899	0.0351	0.0040957	0.00038143	0.0462	0.0252	0.0072859	0.002851	0.015	0.023	0.0057123	0.0063573
610.38	0.089	0.0349	0.0041078	0.00038358	0.0458	0.025	0.0072913	0.0028581	0.0149	0.0229	0.0057221	0.0063644
596.486	0.088	0.0348	0.0041199	0.00038574	0.0455	0.0249	0.0072963	0.0028652	0.0149	0.0228	0.0057318	0.0063711
582.909	0.087	0.0346	0.0041319	0.00038792	0.0451	0.0248	0.0073008	0.0028722	0.0149	0.0227	0.0057412	0.0063775
569.64	0.086	0.0345	0.0041437	0.0003901	0.0448	0.0247	0.0073049	0.0028792	0.0149	0.0226	0.0057503	0.0063836
556.673	0.085	0.0343	0.0041555	0.0003923	0.0444	0.0246	0.0073085	0.0028862	0.0149	0.0225	0.0057593	0.0063893
544.002	0.084	0.0341	0.0041672	0.0003945	0.044	0.0245	0.0073116	0.002893	0.0148	0.0224	0.0057679	0.0063947
531.619	0.0829	0.0339	0.0041787	0.00039672	0.0437	0.0243	0.0073142	0.0028998	0.0148	0.0223	0.0057763	0.0063997
519.518	0.0819	0.0337	0.0041902	0.00039895	0.0433	0.0242	0.0073164	0.0029066	0.0148	0.0222	0.0057844	0.0064044
507.692	0.0809	0.0335	0.0042015	0.00040119	0.0429	0.0241	0.007318	0.0029132	0.0147	0.0221	0.0057922	0.0064087
496.136	0.0798	0.0333	0.0042127	0.00040344	0.0425	0.0239	0.0073191	0.0029198	0.0147	0.022	0.0057997	0.0064126
484.842	0.0788	0.0331	0.0042238	0.00040571	0.0421	0.0238	0.0073197	0.0029264	0.0147	0.0219	0.005807	0.0064161
473.806	0.0777	0.0329	0.0042347	0.00040798	0.0417	0.0236	0.0073198	0.0029328	0.0146	0.0217	0.0058139	0.0064192
463.021	0.0766	0.0327	0.0042455	0.00041027	0.0413	0.0235	0.0073192	0.0029392	0.0146	0.0216	0.0058205	0.0064219
452.481	0.0755	0.0325	0.0042561	0.00041257	0.0408	0.0234	0.0073182	0.0029455	0.0146	0.0215	0.0058268	0.0064242
442.182	0.0745	0.0323	0.0042666	0.00041488	0.0404	0.0232	0.0073165	0.0029517	0.0145	0.0214	0.0058327	0.0064261
432.116	0.0734	0.0321	0.004277	0.0004172	0.04	0.023	0.0073143	0.0029578	0.0145	0.0212	0.0058383	0.0064275
422.28	0.0723	0.0318	0.0042871	0.00041953	0.0396	0.0229	0.0073115	0.0029639	0.0144	0.0211	0.0058436	0.0064285
412.668	0.0712	0.0316	0.0042971	0.00042187	0.0391	0.0227	0.007308	0.0029698	0.0144	0.0209	0.0058485	0.006429
403.274	0.0701	0.0313	0.004307	0.00042423	0.0387	0.0226	0.0073039	0.0029757	0.0143	0.0208	0.005853	0.006429
394.095	0.069	0.0311	0.0043166	0.00042659	0.0383	0.0224	0.0072993	0.0029814	0.0143	0.0207	0.0058572	0.0064286
385.124	0.068	0.0309	0.0043261	0.00042897	0.0378	0.0222	0.0072939	0.0029871	0.0142	0.0205	0.0058609	0.0064277
376.358	0.0669	0.0306	0.0043354	0.00043136	0.0374	0.022	0.0072879	0.0029926	0.0142	0.0204	0.0058643	0.0064262
367.791	0.0658	0.0303	0.0043445	0.00043376	0.0369	0.0219	0.0072813	0.0029981	0.0141	0.0202	0.0058673	0.0064243
359.419	0.0647	0.0301	0.0043533	0.00043617	0.0365	0.0217	0.0072739	0.0030034	0.0141	0.0201	0.0058698	0.0064219
351.237	0.0636	0.0298	0.004362	0.00043859	0.036	0.0215	0.0072659	0.0030086	0.014	0.0199	0.0058719	0.0064189
343.242	0.0626	0.0295	0.0043704	0.00044103	0.0356	0.0213	0.0072572	0.0030137	0.0139	0.0197	0.0058736	0.0064154
335.429	0.0615	0.0293	0.0043786	0.00044347	0.0351	0.0211	0.0072478	0.0030187	0.0139	0.0196	0.0058749	0.0064113
327.794	0.0604	0.029	0.0043866	0.00044593	0.0347	0.0209	0.0072376	0.0030235	0.0138	0.0194	0.0058757	0.0064067
320.332	0.0594	0.0287	0.0043943	0.0004484	0.0342	0.0208	0.0072268	0.0030282	0.0137	0.0193	0.005876	0.0064015
313.041	0.0583	0.0284	0.0044018	0.00045087	0.0337	0.0206	0.0072152	0.0030328	0.0137	0.0191	0.0058759	0.0063958
305.915	0.0572	0.0281	0.0044091	0.00045336	0.0333	0.0204	0.0072028	0.0030372	0.0136	0.0189	0.0058753	0.0063895
298.951	0.0562	0.0278	0.004416	0.00045586	0.0328	0.0202	0.0071897	0.0030415	0.0135	0.0187	0.0058742	0.0063825
292.146	0.0552	0.0276	0.0044227	0.00045838	0.0324	0.02	0.0071758	0.0030457	0.0135	0.0186	0.0058726	0.006375
285.496	0.0541	0.0273	0.0044292	0.0004609	0.0319	0.0198	0.0071611	0.0030497	0.0134	0.0184	0.0058705	0.0063668
278.998	0.0531	0.027	0.0044353	0.00046343	0.0314	0.0196	0.0071457	0.0030535	0.0133	0.0182	0.0058679	0.0063581
272.647	0.0521	0.0267	0.0044411	0.00046598	0.031	0.0194	0.0071295	0.0030572	0.0132	0.018	0.0058647	0.0063487
266.441	0.0511	0.0264	0.0044467	0.00046853	0.0305	0.0191	0.0071124	0.0030607	0.0131	0.0179	0.005861	0.0063386
260.376	0.0501	0.0261	0.0044519	0.0004711	0.0301	0.0189	0.0070946	0.0030641	0.0131	0.0177	0.0058567	0.0063279
254.449	0.0491	0.0257	0.0044568	0.00047367	0.0296	0.0187	0.0070759	0.0030673	0.013	0.0175	0.0058519	0.0063166
248.657	0.0481	0.0254	0.0044614	0.00047626	0.0291	0.0185	0.0070564	0.0030703	0.0129	0.0173	0.0058466	0.0063046
242.997	0.0472	0.0251	0.0044656	0.00047886	0.0287	0.0183	0.0070361	0.0030731	0.0128	0.0171	0.0058406	0.0062919
237.465	0.0462	0.0248	0.0044696	0.00048147	0.0282	0.0181	0.007015	0.0030757	0.0127	0.0169	0.0058341	0.0062786
232.06	0.0453	0.0245	0.0044731	0.00048408	0.0278	0.0179	0.006993	0.0030782	0.0126	0.0167	0.005827	0.0062645
226.778	0.0443	0.0242	0.0044763	0.00048671	0.0273	0.0177	0.0069701	0.0030804	0.0125	0.0166	0.0058192	0.0062498
221.616	0.0434	0.0239	0.0044791	0.00048935	0.0269	0.0174	0.0069464	0.0030825	0.0124	0.0164	0.0058109	0.0062343
216.571	0.0425	0.0235	0.0044816	0.000492	0.0264	0.0172	0.0069219	0.0030843	0.0123	0.0162	0.0058019	0.0062182
211.641	0.0416	0.0232	0.0044836	0.00049466	0.026	0.017	0.0068965	0.003086	0.0122	0.016	0.0057923	0.0062013
206.824	0.0407	0.0229	0.0044853	0.00049733	0.0255	0.0168	0.0068702	0.0030874	0.0121	0.0158	0.0057821	0.0061837
202.116	0.0398	0.0226	0.0044866	0.0005	0.0251	0.0166	0.006843	0.0030886	0.012	0.0156	0.0057712	0.0061654
197.515	0.039	0.0223	0.0044874	0.00050269	0.0247	0.0164	0.006815	0.0030896	0.0119	0.0154	0.0057597	0.0061463
193.019	0.0381	0.022	0.0044879	0.00050539	0.0242	0.0161	0.0067862	0.0030903	0.0118	0.0152	0.0057475	0.0061266
188.626	0.0373	0.0216	0.0044879	0.00050809	0.0238	0.0159	0.0067564	0.0030908	0.0117	0.015	0.0057347	0.006106
184.332	0.0365	0.0213	0.0044874	0.00051081	0.0234	0.0157	0.0067258	0.0030911	0.0116	0.0148	0.0057212	0.0060848
180.136	0.0356	0.021	0.0044865	0.00051353	0.023	0.0155	0.0066943	0.0030912	0.0115	0.0146	0.005707	0.0060628
176.036	0.0348	0.0207	0.0044852	0.00051626	0.0225	0.0153	0.006662	0.0030909	0.0114	0.0144	0.0056921	0.00604
172.029	0.0341	0.0204	0.0044834	0.000519	0.0221	0.015	0.0066287	0.0030905	0.0113	0.0142	0.0056765	0.0060165
168.113	0.0333	0.02	0.0044811	0.00052175	0.0217	0.0148	0.0065947	0.0030897	0.0112	0.014	0.0056602	0.0059922
164.286	0.0325	0.0197	0.0044784	0.00052451	0.0213	0.0146	0.0065597	0.0030887	0.0111	0.0138	0.0056432	0.0059672
160.546	0.0318	0.0194	0.0044751	0.00052728	0.0209	0.0144	0.0065239	0.0030875	0.0109	0.0136	0.0056255	0.0059414
156.892	0.031	0.0191	0.0044714	0.00053005	0.0205	0.0142	0.0064873	0.0030859	0.0108	0.0134	0.0056071	0.0059148
153.321	0.0303	0.0188	0.0044671	0.00053283	0.0201	0.0139	0.0064498	0.0030841	0.0107	0.0132	0.005588	0.0058875
149.831	0.0296	0.0185	0.0044624	0.00053562	0.0197	0.0137	0.0064114	0.003082	0.0106	0.013	0.0055682	0.0058595
146.42	0.0289	0.0182	0.0044571	0.00053841	0.0193	0.0135	0.0063723	0.0030796	0.0105	0.0129	0.0055476	0.0058307
143.087	0.0282	0.0179	0.0044513	0.00054121	0.019	0.0133	0.0063323	0.0030769	0.0104	0.0127	0.0055263	0.0058011
139.83	0.0275	0.0176	0.0044449	0.00054402	0.0186	0.0131	0.0062915	0.0030739	0.0102	0.0125	0.0055043	0.0057708
136.647	0.0269	0.0173	0.004438	0.00054683	0.0182	0.0129	0.0062499	0.0030707	0.0101	0.0123	0.0054816	0.0057397
133.537	0.0262	0.017	0.0044306	0.00054965	0.0178	0.0127	0.0062075	0.0030671	0.01	0.0121	0.0054581	0.0057079
130.497	0.0256	0.0167	0.0044226	0.00055248	0.0175	0.0125	0.0061643	0.0030631	0.0098871	0.0119	0.0054339	0.0056754
127.526	0.025	0.0164	0.004414	0.00055531	0.0171	0.0123	0.0061203	0.0030589	0.0097667	0.0117	0.005409	0.0056421
124.624	0.0244	0.0161	0.0044049	0.00055814	0.0168	0.012	0.0060756	0.0030544	0.0096459	0.0115	0.0053833	0.0056081
121.787	0.0238	0.0158	0.0043952	0.00056098	0.0164	0.0118	0.0060301	0.0030495	0.0095247	0.0113	0.005357	0.0055734
119.015	0.0232	0.0155	0.0043849	0.00056383	0.0161	0.0116	0.0059839	0.0030443	0.0094031	0.0111	0.0053299	0.0055379
116.306	0.0226	0.0152	0.004374	0.00056667	0.0157	0.0114	0.005937	0.0030387	0.0092813	0.011	0.005302	0.0055018
113.658	0.022	0.0149	0.0043625	0.00056953	0.0154	0.0112	0.0058894	0.0030328	0.0091594	0.0108	0.0052735	0.0054649
111.071	0.0215	0.0146	0.0043504	0.00057238	0.0151	0.011	0.0058411	0.0030266	0.0090372	0.0106	0.0052442	0.0054274
108.543	0.0209	0.0144	0.0043378	0.00057524	0.0148	0.0108	0.0057921	0.00302	0.008915	0.0104	0.0052142	0.0053892
106.072	0.0204	0.0141	0.0043245	0.0005781	0.0144	0.0106	0.0057425	0.0030131	0.0087927	0.0102	0.0051836	0.0053503
103.657	0.0199	0.0138	0.0043106	0.00058096	0.0141	0.0104	0.0056922	0.0030058	0.0086705	0.01	0.0051522	0.0053108
101.298	0.0194	0.0136	0.0042961	0.00058382	0.0138	0.0103	0.0056414	0.0029982	0.0085483	0.0098666	0.0051201	0.0052706
98.9921	0.0189	0.0133	0.004281	0.00058668	0.0135	0.0101	0.0055899	0.0029902	0.0084262	0.0096912	0.0050874	0.0052298
96.7388	0.0184	0.013	0.0042652	0.00058955	0.0132	0.0098792	0.0055379	0.0029818	0.0083044	0.0095175	0.0050539	0.0051884
94.5367	0.018	0.0128	0.0042488	0.00059241	0.0129	0.0096938	0.0054853	0.0029731	0.0081827	0.0093454	0.0050198	0.0051464
92.3848	0.0175	0.0125	0.0042319	0.00059527	0.0126	0.0095105	0.0054321	0.002964	0.0080613	0.009175	0.0049851	0.0051037
90.2819	0.017	0.0123	0.0042143	0.00059813	0.0124	0.0093292	0.0053785	0.0029545	0.0079403	0.0090064	0.0049496	0.0050605
88.2268	0.0166	0.012	0.004196	0.00060099	0.0121	0.0091501	0.0053244	0.0029447	0.0078196	0.0088396	0.0049136	0.0050168
86.2185	0.0162	0.0118	0.0041772	0.00060385	0.0118	0.0089731	0.0052698	0.0029344	0.0076993	0.0086746	0.0048769	0.0049725
84.2559	0.0157	0.0115	0.0041577	0.0006067	0.0116	0.0087983	0.0052148	0.0029238	0.0075795	0.0085114	0.0048396	0.0049276
82.3381	0.0153	0.0113	0.0041376	0.00060955	0.0113	0.0086258	0.0051594	0.0029128	0.0074603	0.0083502	0.0048017	0.0048823
80.4638	0.0149	0.011	0.0041169	0.0006124	0.011	0.0084554	0.0051035	0.0029015	0.0073415	0.0081908	0.0047632	0.0048365
78.6322	0.0145	0.0108	0.0040955	0.00061524	0.0108	0.0082873	0.0050473	0.0028897	0.0072234	0.0080333	0.0047241	0.0047902
76.8423	0.0142	0.0106	0.0040736	0.00061807	0.0105	0.0081215	0.0049908	0.0028776	0.007106	0.0078778	0.0046845	0.0047434
75.0932	0.0138	0.0104	0.004051	0.0006209	0.0103	0.007958	0.0049339	0.0028651	0.0069892	0.0077242	0.0046443	0.0046962
73.3839	0.0134	0.0101	0.0040279	0.00062372	0.0101	0.0077967	0.0048768	0.0028522	0.0068732	0.0075727	0.0046035	0.0046486
71.7134	0.0131	0.00992	0.0040041	0.00062654	0.0098181	0.0076378	0.0048194	0.002839	0.0067579	0.0074231	0.0045623	0.0046006
70.081	0.0127	0.0097055	0.0039797	0.00062934	0.0095891	0.0074812	0.0047617	0.0028253	0.0066434	0.0072755	0.0045205	0.0045523
68.4858	0.0124	0.0094944	0.0039547	0.00063214	0.0093646	0.0073268	0.0047038	0.0028113	0.0065298	0.00713	0.0044783	0.0045035
66.9269	0.0121	0.0092868	0.0039292	0.00063492	0.0091446	0.0071748	0.0046458	0.0027969	0.006417	0.0069865	0.0044356	0.0044545
65.4034	0.0117	0.0090826	0.0039031	0.0006377	0.0089289	0.0070252	0.0045875	0.0027821	0.0063052	0.0068451	0.0043924	0.0044051
63.9147	0.0114	0.008882	0.0038764	0.00064046	0.0087177	0.0068778	0.0045292	0.0027669	0.0061943	0.0067056	0.0043489	0.0043555
62.4598	0.0111	0.0086848	0.0038491	0.00064321	0.0085108	0.0067328	0.0044707	0.0027514	0.0060843	0.0065683	0.0043049	0.0043055
61.038	0.0108	0.008491	0.0038213	0.00064594	0.0083081	0.0065901	0.0044121	0.0027355	0.0059754	0.006433	0.0042605	0.0042554
59.6486	0.0105	0.0083007	0.0037929	0.00064866	0.0081097	0.0064497	0.0043535	0.0027192	0.0058675	0.0062998	0.0042157	0.004205
58.2909	0.0102	0.0081137	0.003764	0.00065137	0.0079154	0.0063116	0.0042948	0.0027025	0.0057606	0.0061686	0.0041706	0.0041544
56.964	0.01	0.0079302	0.0037346	0.00065405	0.0077251	0.0061758	0.0042362	0.0026855	0.0056548	0.0060394	0.0041252	0.0041036
55.6674	0.0096895	0.00775	0.0037047	0.00065672	0.0075389	0.0060423	0.0041775	0.0026682	0.0055501	0.0059124	0.0040794	0.0040527
54.4002	0.0094265	0.0075731	0.0036742	0.00065937	0.0073567	0.005911	0.0041189	0.0026504	0.0054465	0.0057873	0.0040334	0.0040016
53.1619	0.0091702	0.0073996	0.0036433	0.000662	0.0071784	0.0057821	0.0040604	0.0026324	0.0053441	0.0056644	0.0039871	0.0039505
51.9518	0.0089205	0.0072293	0.0036119	0.00066461	0.007004	0.0056554	0.0040019	0.002614	0.0052428	0.0055434	0.0039405	0.0038992
50.7692	0.0086771	0.0070623	0.00358	0.0006672	0.0068333	0.0055309	0.0039436	0.0025952	0.0051427	0.0054245	0.0038937	0.0038479
49.6136	0.0084401	0.0068985	0.0035477	0.00066976	0.0066664	0.0054087	0.0038854	0.0025761	0.0050438	0.0053076	0.0038467	0.0037965
48.4842	0.0082092	0.0067379	0.0035149	0.0006723	0.0065031	0.0052886	0.0038274	0.0025567	0.0049461	0.0051927	0.0037996	0.0037452
47.3806	0.0079842	0.0065804	0.0034817	0.00067481	0.0063435	0.0051708	0.0037695	0.002537	0.0048497	0.0050798	0.0037522	0.0036938
46.3021	0.0077652	0.0064261	0.0034482	0.00067729	0.0061874	0.0050551	0.0037119	0.0025169	0.0047544	0.0049688	0.0037048	0.0036424
45.2481	0.0075518	0.0062749	0.0034142	0.00067975	0.0060347	0.0049416	0.0036544	0.0024966	0.0046604	0.0048599	0.0036572	0.0035911
44.2182	0.007344	0.0061267	0.0033798	0.00068217	0.0058856	0.0048302	0.0035973	0.0024759	0.0045677	0.0047529	0.0036095	0.0035399
43.2116	0.0071417	0.0059815	0.0033451	0.00068457	0.0057397	0.0047209	0.0035404	0.002455	0.0044762	0.0046478	0.0035617	0.0034887
42.228	0.0069447	0.0058393	0.0033101	0.00068693	0.0055972	0.0046137	0.0034838	0.0024337	0.004386	0.0045447	0.0035139	0.0034377
41.2668	0.0067529	0.0057	0.0032747	0.00068925	0.005458	0.0045086	0.0034275	0.0024122	0.0042971	0.0044434	0.0034661	0.0033868
40.3274	0.0065662	0.0055636	0.003239	0.00069154	0.0053219	0.0044055	0.0033715	0.0023905	0.0042094	0.0043441	0.0034182	0.003336
39.4095	0.0063844	0.0054301	0.003203	0.0006938	0.005189	0.0043045	0.0033159	0.0023684	0.0041231	0.0042466	0.0033704	0.0032854
38.5124	0.0062075	0.0052994	0.0031668	0.00069601	0.0050591	0.0042054	0.0032607	0.0023461	0.004038	0.0041509	0.0033225	0.003235
37.6358	0.0060353	0.0051715	0.0031303	0.00069818	0.0049322	0.0041083	0.0032058	0.0023236	0.0039542	0.0040571	0.0032748	0.0031848
36.7791	0.0058676	0.0050463	0.0030936	0.00070032	0.0048083	0.0040132	0.0031514	0.0023008	0.0038717	0.0039651	0.0032271	0.0031349
35.9419	0.0057045	0.0049238	0.0030566	0.0007024	0.0046873	0.0039199	0.0030973	0.0022779	0.0037905	0.0038749	0.0031795	0.0030851
35.1237	0.0055457	0.004804	0.0030195	0.00070445	0.0045691	0.0038286	0.0030437	0.0022547	0.0037105	0.0037865	0.0031321	0.0030357
34.3242	0.0053913	0.0046867	0.0029822	0.00070644	0.0044537	0.0037392	0.0029906	0.0022313	0.0036319	0.0036998	0.0030847	0.0029865
33.5429	0.0052409	0.0045721	0.0029447	0.00070839	0.0043411	0.0036515	0.0029379	0.0022077	0.0035545	0.0036148	0.0030375	0.0029376
32.7794	0.0050946	0.0044599	0.0029071	0.00071029	0.0042311	0.0035657	0.0028857	0.0021839	0.0034784	0.0035315	0.0029905	0.002889
32.0332	0.0049523	0.0043503	0.0028693	0.00071213	0.0041237	0.0034817	0.0028339	0.00216	0.0034036	0.0034499	0.0029437	0.0028408
31.3041	0.0048139	0.0042431	0.0028315	0.00071392	0.0040189	0.0033995	0.0027827	0.0021359	0.00333	0.00337	0.0028971	0.0027929
30.5915	0.0046792	0.0041383	0.0027935	0.00071565	0.0039166	0.003319	0.002732	0.0021116	0.0032577	0.0032917	0.0028507	0.0027453
29.8951	0.0045481	0.0040358	0.0027555	0.00071733	0.0038168	0.0032402	0.0026818	0.0020872	0.0031867	0.003215	0.0028046	0.0026981
29.2146	0.0044206	0.0039357	0.0027175	0.00071895	0.0037194	0.0031631	0.0026322	0.0020627	0.0031169	0.0031399	0.0027587	0.0026513
28.5496	0.0042966	0.0038378	0.0026794	0.0007205	0.0036243	0.0030876	0.002583	0.0020381	0.0030483	0.0030664	0.0027131	0.002605
27.8998	0.004176	0.0037422	0.0026413	0.000722	0.0035315	0.0030138	0.0025345	0.0020134	0.002981	0.0029944	0.0026678	0.002559
27.2647	0.0040587	0.0036488	0.0026033	0.00072342	0.003441	0.0029416	0.0024865	0.0019886	0.0029149	0.0029239	0.0026227	0.0025134
26.6441	0.0039446	0.0035575	0.0025652	0.00072478	0.0033527	0.002871	0.002439	0.0019637	0.00285	0.0028549	0.0025781	0.0024683
26.0376	0.0038336	0.0034684	0.0025272	0.00072607	0.0032666	0.0028019	0.0023922	0.0019387	0.0027863	0.0027874	0.0025337	0.0024236
25.4449	0.0037257	0.0033813	0.0024893	0.00072729	0.0031826	0.0027343	0.0023459	0.0019137	0.0027238	0.0027213	0.0024897	0.0023793
24.8657	0.0036208	0.0032962	0.0024514	0.00072844	0.0031006	0.0026682	0.0023002	0.0018886	0.0026625	0.0026566	0.002446	0.0023355
24.2997	0.0035187	0.0032132	0.0024137	0.00072951	0.0030206	0.0026036	0.0022551	0.0018635	0.0026023	0.0025934	0.0024028	0.0022922
23.7466	0.0034195	0.003132	0.002376	0.0007305	0.0029427	0.0025404	0.0022106	0.0018384	0.0025433	0.0025315	0.0023599	0.0022494
23.206	0.003323	0.0030528	0.0023385	0.00073141	0.0028666	0.0024787	0.0021667	0.0018132	0.0024854	0.002471	0.0023174	0.002207
22.6778	0.0032291	0.0029755	0.0023011	0.00073224	0.0027925	0.0024183	0.0021234	0.0017881	0.0024286	0.0024117	0.0022753	0.0021652
22.1616	0.0031379	0.0029	0.0022639	0.00073299	0.0027202	0.0023593	0.0020807	0.001763	0.002373	0.0023538	0.0022336	0.0021238
21.6571	0.0030492	0.0028264	0.0022269	0.00073365	0.0026497	0.0023016	0.0020386	0.0017379	0.0023184	0.0022972	0.0021924	0.002083
21.1641	0.002963	0.0027544	0.00219	0.00073423	0.0025809	0.0022453	0.0019972	0.0017128	0.002265	0.0022419	0.0021516	0.0020426
20.6824	0.0028791	0.0026842	0.0021534	0.00073471	0.0025139	0.0021902	0.0019563	0.0016878	0.0022126	0.0021877	0.0021112	0.0020028
20.2116	0.0027976	0.0026157	0.002117	0.00073511	0.0024485	0.0021364	0.001916	0.0016628	0.0021613	0.0021348	0.0020713	0.0019635
19.7515	0.0027184	0.0025489	0.0020808	0.00073541	0.0023848	0.0020839	0.0018764	0.0016379	0.002111	0.0020831	0.0020318	0.0019247
19.3019	0.0026413	0.0024837	0.0020448	0.00073561	0.0023227	0.0020325	0.0018374	0.001613	0.0020617	0.0020325	0.0019928	0.0018864
18.8626	0.0025664	0.00242	0.0020092	0.00073572	0.0022622	0.0019824	0.001799	0.0015883	0.0020135	0.0019831	0.0019543	0.0018487
18.4332	0.0024936	0.0023579	0.0019737	0.00073573	0.0022032	0.0019334	0.0017612	0.0015636	0.0019663	0.0019348	0.0019163	0.0018115
18.0136	0.0024229	0.0022973	0.0019386	0.00073563	0.0021457	0.0018855	0.001724	0.0015391	0.00192	0.0018876	0.0018787	0.0017748
17.6036	0.0023541	0.0022382	0.0019038	0.00073543	0.0020896	0.0018388	0.0016874	0.0015146	0.0018748	0.0018415	0.0018416	0.0017387
17.2029	0.0022872	0.0021806	0.0018692	0.00073513	0.002035	0.0017932	0.0016514	0.0014903	0.0018304	0.0017965	0.001805	0.0017031
16.8113	0.0022222	0.0021244	0.001835	0.00073472	0.0019817	0.0017486	0.001616	0.0014661	0.0017871	0.0017524	0.0017689	0.001668
16.4286	0.0021591	0.0020695	0.0018011	0.0007342	0.0019298	0.0017051	0.0015812	0.001442	0.0017446	0.0017094	0.0017333	0.0016335
16.0546	0.0020977	0.0020161	0.0017675	0.00073357	0.0018793	0.0016626	0.0015471	0.0014181	0.0017031	0.0016674	0.0016982	0.0015995
15.6892	0.002038	0.0019639	0.0017343	0.00073283	0.00183	0.0016211	0.0015135	0.0013944	0.0016624	0.0016264	0.0016636	0.001566
15.3321	0.00198	0.001913	0.0017014	0.00073197	0.001782	0.0015807	0.0014805	0.0013708	0.0016227	0.0015863	0.0016295	0.0015331
14.9831	0.0019236	0.0018635	0.0016689	0.000731	0.0017352	0.0015411	0.0014481	0.0013474	0.0015838	0.0015472	0.0015959	0.0015007
14.642	0.0018689	0.0018151	0.0016367	0.00072991	0.0016896	0.0015026	0.0014162	0.0013241	0.0015457	0.001509	0.0015628	0.0014689
14.3087	0.0018156	0.001768	0.001605	0.0007287	0.0016452	0.0014649	0.001385	0.0013011	0.0015085	0.0014717	0.0015302	0.0014375
13.983	0.0017639	0.001722	0.0015735	0.00072738	0.0016019	0.0014282	0.0013543	0.0012782	0.0014721	0.0014352	0.0014982	0.0014067
13.6647	0.0017136	0.0016772	0.0015425	0.00072593	0.0015597	0.0013923	0.0013242	0.0012556	0.0014366	0.0013997	0.0014666	0.0013764
13.3537	0.0016648	0.0016335	0.0015119	0.00072435	0.0015187	0.0013573	0.0012946	0.0012331	0.0014018	0.0013649	0.0014355	0.0013467
13.0497	0.0016173	0.0015909	0.0014816	0.00072266	0.0014786	0.0013231	0.0012656	0.0012108	0.0013678	0.001331	0.001405	0.0013174
12.7527	0.0015712	0.0015494	0.0014517	0.00072084	0.0014397	0.0012898	0.0012372	0.0011888	0.0013345	0.0012979	0.0013749	0.0012887
12.4624	0.0015263	0.0015089	0.0014223	0.00071889	0.0014017	0.0012573	0.0012092	0.001167	0.001302	0.0012656	0.0013453	0.0012605
12.1787	0.0014828	0.0014695	0.0013932	0.00071682	0.0013647	0.0012256	0.0011819	0.0011454	0.0012703	0.001234	0.0013163	0.0012328
11.9015	0.0014404	0.0014311	0.0013646	0.00071462	0.0013286	0.0011946	0.001155	0.001124	0.0012393	0.0012033	0.0012877	0.0012056
11.6306	0.0013993	0.0013936	0.0013363	0.00071229	0.0012935	0.0011644	0.0011287	0.0011029	0.0012089	0.0011732	0.0012596	0.0011788
11.3658	0.0013593	0.0013571	0.0013085	0.00070983	0.0012594	0.0011349	0.0011029	0.001082	0.0011793	0.0011439	0.001232	0.0011526
11.1071	0.0013205	0.0013215	0.001281	0.00070725	0.0012261	0.0011062	0.0010776	0.0010614	0.0011503	0.0011153	0.0012049	0.0011269
10.8543	0.0012827	0.0012869	0.001254	0.00070453	0.0011936	0.0010781	0.0010529	0.001041	0.0011221	0.0010873	0.0011783	0.0011016
10.6072	0.0012461	0.0012531	0.0012274	0.00070168	0.001162	0.0010508	0.0010286	0.0010208	0.0010944	0.0010601	0.0011522	0.0010769
10.3657	0.0012105	0.0012202	0.0012012	0.00069871	0.0011313	0.0010241	0.0010048	0.0010009	0.0010675	0.0010335	0.0011265	0.0010526
10.1298	0.0011758	0.0011881	0.0011755	0.0006956	0.0011013	0.00099811	0.0009815	0.00098126	0.0010411	0.0010075	0.0011013	0.0010288
9.8992	0.0011422	0.0011569	0.0011501	0.00069237	0.0010721	0.00097273	0.00095868	0.00096187	0.0010154	0.00098221	0.0010766	0.0010054
9.6739	0.0011095	0.0011264	0.0011252	0.000689	0.0010437	0.00094799	0.00093633	0.00094273	0.00099022	0.00095751	0.0010524	0.00098249
9.4537	0.0010778	0.0010968	0.0011006	0.00068551	0.001016	0.00092385	0.00091444	0.00092386	0.00096567	0.00093341	0.0010286	0.00096004
9.2385	0.0010469	0.0010679	0.0010765	0.00068189	0.00098906	0.00090031	0.00089302	0.00090524	0.0009417	0.0009099	0.0010052	0.00093803
9.0282	0.001017	0.0010397	0.0010528	0.00067814	0.00096281	0.00087736	0.00087204	0.00088689	0.00091829	0.00088696	0.00098236	0.00091647
8.8227	0.00098786	0.0010123	0.0010295	0.00067426	0.00093725	0.00085498	0.0008515	0.00086879	0.00089544	0.00086459	0.00095991	0.00089534
8.6219	0.00095957	0.00098557	0.0010066	0.00067026	0.00091236	0.00083316	0.00083141	0.00085097	0.00087313	0.00084277	0.00093791	0.00087464
8.4256	0.00093209	0.00095955	0.00098412	0.00066614	0.00088812	0.00081188	0.00081174	0.00083341	0.00085135	0.00082148	0.00091634	0.00085436
8.2338	0.00090539	0.0009342	0.00096203	0.00066189	0.00086451	0.00079113	0.00079249	0.00081611	0.00083009	0.00080071	0.0008952	0.0008345
8.0464	0.00087945	0.00090951	0.00094034	0.00065752	0.00084153	0.0007709	0.00077366	0.00079908	0.00080934	0.00078046	0.00087448	0.00081505
7.8632	0.00085426	0.00088546	0.00091905	0.00065302	0.00081915	0.00075117	0.00075524	0.00078231	0.00078909	0.00076071	0.00085418	0.000796
7.6842	0.00082978	0.00086203	0.00089815	0.00064841	0.00079736	0.00073194	0.00073722	0.00076581	0.00076932	0.00074144	0.00083429	0.00077735
7.5093	0.00080599	0.00083921	0.00087765	0.00064369	0.00077615	0.00071319	0.00071959	0.00074958	0.00075003	0.00072266	0.00081481	0.0007591
7.3384	0.00078289	0.00081699	0.00085753	0.00063884	0.00075549	0.00069492	0.00070236	0.0007336	0.0007312	0.00070433	0.00079573	0.00074123
7.1713	0.00076045	0.00079535	0.00083779	0.00063389	0.00073538	0.0006771	0.0006855	0.00071789	0.00071283	0.00068646	0.00077705	0.00072374
7.0081	0.00073864	0.00077427	0.00081844	0.00062883	0.00071579	0.00065973	0.00066901	0.00070245	0.0006949	0.00066904	0.00075876	0.00070662
6.8486	0.00071746	0.00075374	0.00079946	0.00062365	0.00069673	0.00064279	0.0006529	0.00068726	0.00067741	0.00065205	0.00074085	0.00068987
6.6927	0.00069688	0.00073375	0.00078085	0.00061837	0.00067816	0.00062629	0.00063714	0.00067233	0.00066034	0.00063548	0.00072332	0.00067349
6.5403	0.0006769	0.00071428	0.00076261	0.00061299	0.00066009	0.0006102	0.00062174	0.00065767	0.00064369	0.00061932	0.00070616	0.00065746
6.3915	0.00065748	0.00069532	0.00074474	0.00060751	0.0006425	0.00059452	0.00060668	0.00064326	0.00062744	0.00060357	0.00068936	0.00064178
6.246	0.00063862	0.00067685	0.00072722	0.00060193	0.00062536	0.00057923	0.00059196	0.0006291	0.00061159	0.00058821	0.00067293	0.00062644
6.1038	0.00062029	0.00065887	0.00071006	0.00059626	0.00060869	0.00056433	0.00057758	0.0006152	0.00059613	0.00057323	0.00065685	0.00061144
5.9649	0.00060249	0.00064136	0.00069326	0.0005905	0.00059245	0.00054981	0.00056352	0.00060155	0.00058105	0.00055863	0.00064113	0.00059677
5.8291	0.0005852	0.00062431	0.00067679	0.00058465	0.00057664	0.00053565	0.00054979	0.00058815	0.00056634	0.00054439	0.00062574	0.00058242
5.6964	0.0005684	0.00060771	0.00066067	0.00057871	0.00056125	0.00052186	0.00053637	0.00057499	0.00055199	0.00053051	0.00061069	0.0005684
5.5667	0.00055209	0.00059155	0.00064489	0.0005727	0.00054627	0.00050841	0.00052326	0.00056209	0.00053799	0.00051698	0.00059597	0.00055468
5.44	0.00053624	0.00057581	0.00062943	0.00056661	0.00053169	0.00049531	0.00051045	0.00054942	0.00052434	0.00050379	0.00058158	0.00054128
5.3162	0.00052084	0.00056048	0.00061431	0.00056044	0.00051749	0.00048254	0.00049793	0.00053699	0.00051103	0.00049093	0.00056751	0.00052818
5.1952	0.00050589	0.00054556	0.00059951	0.0005542	0.00050367	0.00047009	0.00048571	0.00052481	0.00049804	0.00047839	0.00055375	0.00051537
5.0769	0.00049136	0.00053103	0.00058502	0.0005479	0.00049022	0.00045796	0.00047377	0.00051285	0.00048538	0.00046617	0.0005403	0.00050286
4.9614	0.00047725	0.00051688	0.00057085	0.00054153	0.00047712	0.00044614	0.00046211	0.00050113	0.00047303	0.00045426	0.00052715	0.00049062
4.8484	0.00046354	0.00050311	0.00055698	0.00053511	0.00046437	0.00043462	0.00045073	0.00048964	0.00046099	0.00044264	0.0005143	0.00047867
4.7381	0.00045023	0.0004897	0.00054342	0.00052863	0.00045196	0.0004234	0.0004396	0.00047838	0.00044924	0.00043132	0.00050174	0.00046699
4.6302	0.0004373	0.00047664	0.00053016	0.0005221	0.00043988	0.00041246	0.00042875	0.00046734	0.00043779	0.00042029	0.00048946	0.00045558
4.5248	0.00042473	0.00046393	0.00051719	0.00051553	0.00042812	0.0004018	0.00041814	0.00045653	0.00042663	0.00040953	0.00047747	0.00044444
4.4218	0.00041253	0.00045156	0.0005045	0.00050891	0.00041667	0.00039141	0.00040779	0.00044593	0.00041574	0.00039904	0.00046575	0.00043355
4.3212	0.00040068	0.00043951	0.0004921	0.00050226	0.00040553	0.00038129	0.00039768	0.00043554	0.00040513	0.00038882	0.0004543	0.00042291
4.2228	0.00038917	0.00042778	0.00047998	0.00049557	0.00039468	0.00037143	0.00038781	0.00042537	0.00039478	0.00037886	0.00044311	0.00041252
4.1267	0.00037798	0.00041636	0.00046813	0.00048885	0.00038412	0.00036182	0.00037818	0.00041541	0.00038469	0.00036915	0.00043219	0.00040237
4.0327	0.00036712	0.00040524	0.00045655	0.0004821	0.00037385	0.00035246	0.00036878	0.00040566	0.00037485	0.00035969	0.00042151	0.00039246
3.9409	0.00035657	0.00039442	0.00044523	0.00047533	0.00036384	0.00034333	0.0003596	0.00039611	0.00036526	0.00035047	0.00041109	0.00038279
3.8512	0.00034632	0.00038389	0.00043417	0.00046854	0.0003541	0.00033444	0.00035064	0.00038676	0.00035591	0.00034148	0.00040091	0.00037334
3.7636	0.00033637	0.00037363	0.00042337	0.00046174	0.00034463	0.00032578	0.0003419	0.00037761	0.0003468	0.00033272	0.00039097	0.00036411
3.6779	0.0003267	0.00036365	0.00041281	0.00045493	0.0003354	0.00031734	0.00033336	0.00036865	0.00033791	0.00032418	0.00038126	0.0003551
3.5942	0.00031731	0.00035393	0.0004025	0.00044812	0.00032642	0.00030912	0.00032503	0.00035989	0.00032925	0.00031586	0.00037178	0.0003463
3.5124	0.00030819	0.00034447	0.00039242	0.0004413	0.00031768	0.00030111	0.00031691	0.00035131	0.00032081	0.00030775	0.00036252	0.00033771
3.4324	0.00029933	0.00033526	0.00038258	0.00043448	0.00030918	0.0002933	0.00030897	0.00034292	0.00031258	0.00029984	0.00035349	0.00032933
3.3543	0.00029072	0.00032629	0.00037298	0.00042767	0.0003009	0.0002857	0.00030124	0.00033471	0.00030456	0.00029214	0.00034466	0.00032115
3.2779	0.00028236	0.00031757	0.00036359	0.00042087	0.00029284	0.00027829	0.00029368	0.00032668	0.00029674	0.00028463	0.00033605	0.00031316
3.2033	0.00027424	0.00030907	0.00035443	0.00041408	0.00028499	0.00027107	0.00028632	0.00031882	0.00028912	0.00027732	0.00032765	0.00030536
3.1304	0.00026636	0.0003008	0.00034549	0.00040731	0.00027736	0.00026404	0.00027913	0.00031114	0.00028169	0.00027019	0.00031944	0.00029775
3.0591	0.0002587	0.00029275	0.00033676	0.00040056	0.00026993	0.00025719	0.00027211	0.00030363	0.00027445	0.00026324	0.00031143	0.00029032
2.9895	0.00025126	0.00028492	0.00032823	0.00039383	0.00026269	0.00025051	0.00026527	0.00029628	0.00026739	0.00025647	0.00030362	0.00028307
2.9215	0.00024403	0.00027729	0.00031991	0.00038713	0.00025565	0.00024401	0.0002586	0.0002891	0.00026051	0.00024988	0.00029599	0.000276
2.855	0.00023702	0.00026987	0.00031179	0.00038046	0.0002488	0.00023767	0.00025209	0.00028208	0.00025381	0.00024345	0.00028855	0.0002691
2.79	0.0002302	0.00026264	0.00030386	0.00037382	0.00024213	0.0002315	0.00024573	0.00027522	0.00024728	0.00023718	0.00028128	0.00026236
2.7265	0.00022358	0.00025561	0.00029613	0.00036722	0.00023564	0.00022549	0.00023954	0.00026851	0.00024091	0.00023108	0.0002742	0.00025579
2.6644	0.00021715	0.00024877	0.00028858	0.00036066	0.00022933	0.00021963	0.00023349	0.00026195	0.00023471	0.00022513	0.00026728	0.00024938
2.6038	0.0002109	0.0002421	0.00028122	0.00035415	0.00022318	0.00021392	0.0002276	0.00025555	0.00022866	0.00021933	0.00026054	0.00024312
2.5445	0.00020483	0.00023562	0.00027403	0.00034767	0.00021719	0.00020837	0.00022185	0.00024929	0.00022277	0.00021368	0.00025395	0.00023701
2.4866	0.00019894	0.0002293	0.00026702	0.00034125	0.00021137	0.00020295	0.00021624	0.00024317	0.00021702	0.00020818	0.00024753	0.00023106
2.43	0.00019322	0.00022316	0.00026018	0.00033487	0.0002057	0.00019768	0.00021077	0.0002372	0.00021143	0.00020282	0.00024127	0.00022525
2.3747	0.00018766	0.00021718	0.00025351	0.00032855	0.00020018	0.00019254	0.00020544	0.00023136	0.00020597	0.00019759	0.00023516	0.00021958
2.3206	0.00018226	0.00021136	0.000247	0.00032229	0.00019482	0.00018753	0.00020024	0.00022565	0.00020066	0.0001925	0.0002292	0.00021405
2.2678	0.00017702	0.00020569	0.00024065	0.00031608	0.00018959	0.00018265	0.00019516	0.00022008	0.00019548	0.00018754	0.00022338	0.00020866
2.2162	0.00017192	0.00020018	0.00023446	0.00030993	0.0001845	0.0001779	0.00019022	0.00021464	0.00019044	0.0001827	0.00021771	0.0002034
2.1657	0.00016698	0.00019481	0.00022842	0.00030384	0.00017956	0.00017328	0.00018539	0.00020933	0.00018552	0.00017799	0.00021218	0.00019826
2.1164	0.00016217	0.00018959	0.00022253	0.00029782	0.00017474	0.00016877	0.00018069	0.00020414	0.00018073	0.0001734	0.00020679	0.00019326
2.0682	0.00015751	0.0001845	0.00021679	0.00029186	0.00017005	0.00016438	0.0001761	0.00019907	0.00017606	0.00016893	0.00020153	0.00018838
2.0212	0.00015297	0.00017956	0.00021119	0.00028597	0.00016549	0.0001601	0.00017163	0.00019413	0.00017151	0.00016458	0.0001964	0.00018362
1.9752	0.00014857	0.00017474	0.00020573	0.00028015	0.00016105	0.00015593	0.00016727	0.0001893	0.00016708	0.00016033	0.00019139	0.00017897
1.9302	0.0001443	0.00017005	0.0002004	0.00027439	0.00015673	0.00015188	0.00016302	0.00018458	0.00016276	0.00015619	0.00018651	0.00017444
1.8863	0.00014015	0.00016549	0.00019521	0.00026871	0.00015252	0.00014792	0.00015887	0.00017998	0.00015855	0.00015216	0.00018176	0.00017003
1.8433	0.00013611	0.00016105	0.00019015	0.0002631	0.00014843	0.00014407	0.00015483	0.00017548	0.00015445	0.00014824	0.00017712	0.00016572
1.8014	0.0001322	0.00015673	0.00018522	0.00025756	0.00014444	0.00014032	0.00015089	0.00017109	0.00015045	0.00014441	0.00017259	0.00016152
1.7604	0.00012839	0.00015253	0.00018041	0.0002521	0.00014057	0.00013667	0.00014704	0.00016681	0.00014656	0.00014068	0.00016818	0.00015742
1.7203	0.0001247	0.00014843	0.00017572	0.00024671	0.00013679	0.00013311	0.0001433	0.00016263	0.00014277	0.00013705	0.00016388	0.00015343
1.6811	0.00012111	0.00014445	0.00017115	0.0002414	0.00013312	0.00012964	0.00013965	0.00015855	0.00013907	0.00013351	0.00015969	0.00014954
1.6429	0.00011762	0.00014057	0.00016669	0.00023617	0.00012955	0.00012627	0.00013609	0.00015457	0.00013547	0.00013007	0.0001556	0.00014574
1.6055	0.00011424	0.0001368	0.00016235	0.00023101	0.00012607	0.00012298	0.00013262	0.00015069	0.00013197	0.00012671	0.00015162	0.00014204
1.5689	0.00011095	0.00013313	0.00015812	0.00022594	0.00012269	0.00011977	0.00012923	0.0001469	0.00012855	0.00012344	0.00014773	0.00013843
1.5332	0.00010776	0.00012955	0.00015399	0.00022094	0.00011939	0.00011665	0.00012593	0.0001432	0.00012522	0.00012025	0.00014395	0.00013491
1.4983	0.00010465	0.00012607	0.00014997	0.00021602	0.00011619	0.00011361	0.00012272	0.00013959	0.00012198	0.00011714	0.00014025	0.00013148
1.4642	0.00010164	0.00012269	0.00014606	0.00021117	0.00011307	0.00011065	0.00011959	0.00013607	0.00011882	0.00011412	0.00013666	0.00012813
1.4309	9.8716e-05	0.0001194	0.00014224	0.00020641	0.00011003	0.00010777	0.00011653	0.00013263	0.00011574	0.00011117	0.00013315	0.00012487
1.3983	9.5874e-05	0.00011619	0.00013852	0.00020173	0.00010708	0.00010496	0.00011355	0.00012928	0.00011274	0.00010829	0.00012973	0.00012169
1.3665	9.3115e-05	0.00011307	0.00013489	0.00019712	0.0001042	0.00010223	0.00011065	0.00012601	0.00010982	0.0001055	0.00012639	0.00011859
1.3354	9.0434e-05	0.00011003	0.00013136	0.0001926	0.0001014	9.9561e-05	0.00010782	0.00012282	0.00010697	0.00010277	0.00012315	0.00011557
1.305	8.7831e-05	0.00010708	0.00012792	0.00018815	9.8679e-05	9.6966e-05	0.00010506	0.00011971	0.0001042	0.00010011	0.00011998	0.00011262
1.2753	8.5303e-05	0.0001042	0.00012457	0.00018378	9.6029e-05	9.4438e-05	0.00010237	0.00011667	0.00010149	9.7527e-05	0.00011689	0.00010975
1.2462	8.2847e-05	0.0001014	0.0001213	0.0001795	9.345e-05	9.1976e-05	9.9755e-05	0.00011371	9.8863e-05	9.5006e-05	0.00011388	0.00010695
1.2179	8.0462e-05	9.868e-05	0.00011812	0.00017529	9.094e-05	8.9578e-05	9.7201e-05	0.00011083	9.6298e-05	9.255e-05	0.00011095	0.00010422
1.1901	7.8146e-05	9.6029e-05	0.00011502	0.00017115	8.8498e-05	8.7243e-05	9.4712e-05	0.00010801	9.38e-05	9.0157e-05	0.00010809	0.00010156
1.1631	7.5896e-05	9.3449e-05	0.00011199	0.0001671	8.6121e-05	8.4968e-05	9.2287e-05	0.00010526	9.1367e-05	8.7826e-05	0.00010531	9.8965e-05
1.1366	7.3711e-05	9.0939e-05	0.00010905	0.00016312	8.3807e-05	8.2752e-05	8.9922e-05	0.00010259	8.8996e-05	8.5555e-05	0.00010259	9.6437e-05
1.1107	7.1589e-05	8.8495e-05	0.00010618	0.00015922	8.1556e-05	8.0594e-05	8.7618e-05	9.9974e-05	8.6687e-05	8.3343e-05	9.9949e-05	9.3973e-05
1.0854	6.9528e-05	8.6118e-05	0.00010339	0.0001554	7.9365e-05	7.8492e-05	8.5373e-05	9.7427e-05	8.4437e-05	8.1188e-05	9.7371e-05	9.1571e-05
1.0607	6.7527e-05	8.3804e-05	0.00010067	0.00015165	7.7233e-05	7.6445e-05	8.3184e-05	9.4944e-05	8.2245e-05	7.9088e-05	9.4859e-05	8.923e-05
1.0366	6.5583e-05	8.1552e-05	9.8017e-05	0.00014797	7.5159e-05	7.4451e-05	8.1051e-05	9.2522e-05	8.011e-05	7.7043e-05	9.2411e-05	8.6948e-05
1.013	6.3695e-05	7.9361e-05	9.5435e-05	0.00014437	7.314e-05	7.2509e-05	7.8972e-05	9.0161e-05	7.8031e-05	7.505e-05	9.0025e-05	8.4724e-05
0.9899	6.1861e-05	7.7228e-05	9.292e-05	0.00014084	7.1175e-05	7.0618e-05	7.6946e-05	8.7858e-05	7.6005e-05	7.3109e-05	8.77e-05	8.2556e-05
0.9674	6.008e-05	7.5153e-05	9.047e-05	0.00013738	6.9263e-05	6.8776e-05	7.4972e-05	8.5614e-05	7.4031e-05	7.1218e-05	8.5435e-05	8.0443e-05
0.9454	5.835e-05	7.3133e-05	8.8083e-05	0.000134	6.7402e-05	6.6981e-05	7.3048e-05	8.3425e-05	7.2109e-05	6.9375e-05	8.3227e-05	7.8384e-05
0.9238	5.667e-05	7.1167e-05	8.5759e-05	0.00013069	6.5591e-05	6.5234e-05	7.1173e-05	8.1291e-05	7.0236e-05	6.7581e-05	8.1076e-05	7.6377e-05
0.9028	5.5038e-05	6.9255e-05	8.3496e-05	0.00012744	6.3828e-05	6.3532e-05	6.9346e-05	7.9211e-05	6.8412e-05	6.5832e-05	7.898e-05	7.442e-05
0.8823	5.3454e-05	6.7393e-05	8.1291e-05	0.00012427	6.2114e-05	6.1874e-05	6.7565e-05	7.7182e-05	6.6635e-05	6.4129e-05	7.6938e-05	7.2514e-05
0.8622	5.1915e-05	6.5582e-05	7.9143e-05	0.00012116	6.0445e-05	6.026e-05	6.583e-05	7.5205e-05	6.4904e-05	6.247e-05	7.4947e-05	7.0656e-05
0.8426	5.042e-05	6.3819e-05	7.7052e-05	0.00011812	5.882e-05	5.8687e-05	6.4139e-05	7.3278e-05	6.3217e-05	6.0853e-05	7.3008e-05	6.8845e-05
0.8234	4.8968e-05	6.2103e-05	7.5015e-05	0.00011515	5.724e-05	5.7156e-05	6.2491e-05	7.1399e-05	6.1575e-05	5.9278e-05	7.1119e-05	6.708e-05
0.8046	4.7558e-05	6.0434e-05	7.3032e-05	0.00011225	5.5702e-05	5.5664e-05	6.0885e-05	6.9567e-05	5.9975e-05	5.7744e-05	6.9278e-05	6.536e-05
0.7863	4.6189e-05	5.8809e-05	7.11e-05	0.0001094	5.4205e-05	5.4211e-05	5.932e-05	6.7781e-05	5.8416e-05	5.625e-05	6.7484e-05	6.3684e-05
0.7684	4.4859e-05	5.7228e-05	6.9219e-05	0.00010662	5.2748e-05	5.2797e-05	5.7796e-05	6.6041e-05	5.6898e-05	5.4794e-05	6.5736e-05	6.2051e-05
0.7509	4.3567e-05	5.569e-05	6.7387e-05	0.00010391	5.1331e-05	5.1419e-05	5.631e-05	6.4345e-05	5.5419e-05	5.3376e-05	6.4033e-05	6.0459e-05
0.7338	4.2313e-05	5.4193e-05	6.5603e-05	0.00010125	4.9952e-05	5.0077e-05	5.4862e-05	6.2691e-05	5.3979e-05	5.1994e-05	6.2374e-05	5.8907e-05
0.7171	4.1095e-05	5.2736e-05	6.3865e-05	9.8658e-05	4.8609e-05	4.8769e-05	5.3451e-05	6.1079e-05	5.2576e-05	5.0649e-05	6.0758e-05	5.7396e-05
0.7008	3.9911e-05	5.1318e-05	6.2174e-05	9.6123e-05	4.7303e-05	4.7496e-05	5.2076e-05	5.9509e-05	5.1209e-05	4.9338e-05	5.9183e-05	5.5922e-05
0.6849	3.8762e-05	4.9938e-05	6.0526e-05	9.3646e-05	4.6032e-05	4.6257e-05	5.0737e-05	5.7978e-05	4.9878e-05	4.806e-05	5.7649e-05	5.4487e-05
0.6693	3.7646e-05	4.8595e-05	5.8922e-05	9.1227e-05	4.4795e-05	4.5049e-05	4.9432e-05	5.6485e-05	4.8581e-05	4.6816e-05	5.6154e-05	5.3087e-05
0.654	3.6562e-05	4.7289e-05	5.736e-05	8.8865e-05	4.3591e-05	4.3873e-05	4.816e-05	5.5031e-05	4.7318e-05	4.5604e-05	5.4697e-05	5.1724e-05
0.6391	3.5509e-05	4.6017e-05	5.5839e-05	8.6558e-05	4.2419e-05	4.2728e-05	4.692e-05	5.3614e-05	4.6087e-05	4.4424e-05	5.3278e-05	5.0395e-05
0.6246	3.4487e-05	4.478e-05	5.4358e-05	8.4305e-05	4.1279e-05	4.1612e-05	4.5713e-05	5.2232e-05	4.4889e-05	4.3274e-05	5.1896e-05	4.9101e-05
0.6104	3.3494e-05	4.3576e-05	5.2916e-05	8.2106e-05	4.017e-05	4.0526e-05	4.4536e-05	5.0886e-05	4.3721e-05	4.2153e-05	5.0549e-05	4.7839e-05
0.5965	3.2529e-05	4.2404e-05	5.1511e-05	7.996e-05	3.909e-05	3.9468e-05	4.339e-05	4.9574e-05	4.2584e-05	4.1062e-05	4.9238e-05	4.661e-05
0.5829	3.1592e-05	4.1264e-05	5.0144e-05	7.7864e-05	3.8039e-05	3.8437e-05	4.2272e-05	4.8296e-05	4.1477e-05	3.9998e-05	4.7959e-05	4.5412e-05
0.5696	3.0683e-05	4.0154e-05	4.8813e-05	7.582e-05	3.7017e-05	3.7434e-05	4.1184e-05	4.705e-05	4.0398e-05	3.8963e-05	4.6714e-05	4.4245e-05
0.5567	2.9799e-05	3.9074e-05	4.7517e-05	7.3825e-05	3.6022e-05	3.6456e-05	4.0123e-05	4.5836e-05	3.9347e-05	3.7954e-05	4.5501e-05	4.3107e-05
0.544	2.8941e-05	3.8023e-05	4.6255e-05	7.1878e-05	3.5054e-05	3.5504e-05	3.909e-05	4.4652e-05	3.8324e-05	3.6971e-05	4.432e-05	4.1999e-05
0.5316	2.8108e-05	3.7001e-05	4.5026e-05	6.9979e-05	3.4112e-05	3.4577e-05	3.8083e-05	4.3499e-05	3.7327e-05	3.6014e-05	4.3168e-05	4.0919e-05
0.5195	2.7298e-05	3.6006e-05	4.3829e-05	6.8127e-05	3.3195e-05	3.3674e-05	3.7102e-05	4.2376e-05	3.6356e-05	3.5081e-05	4.2047e-05	3.9866e-05
0.5077	2.6512e-05	3.5037e-05	4.2665e-05	6.632e-05	3.2302e-05	3.2795e-05	3.6146e-05	4.1281e-05	3.541e-05	3.4172e-05	4.0955e-05	3.8841e-05
0.4961	2.5749e-05	3.4095e-05	4.1531e-05	6.4558e-05	3.1434e-05	3.1939e-05	3.5215e-05	4.0214e-05	3.4488e-05	3.3287e-05	3.989e-05	3.7842e-05
0.4848	2.5007e-05	3.3178e-05	4.0426e-05	6.284e-05	3.0589e-05	3.1105e-05	3.4308e-05	3.9175e-05	3.3591e-05	3.2425e-05	3.8854e-05	3.6868e-05
0.4738	2.4287e-05	3.2286e-05	3.9352e-05	6.1164e-05	2.9767e-05	3.0292e-05	3.3424e-05	3.8162e-05	3.2717e-05	3.1586e-05	3.7844e-05	3.592e-05
0.463	2.3588e-05	3.1417e-05	3.8305e-05	5.9531e-05	2.8967e-05	2.9501e-05	3.2562e-05	3.7175e-05	3.1866e-05	3.0768e-05	3.686e-05	3.4995e-05
0.4525	2.2909e-05	3.0572e-05	3.7286e-05	5.7938e-05	2.8188e-05	2.8731e-05	3.1723e-05	3.6213e-05	3.1037e-05	2.9971e-05	3.5902e-05	3.4095e-05
0.4422	2.2249e-05	2.975e-05	3.6294e-05	5.6386e-05	2.743e-05	2.798e-05	3.0905e-05	3.5277e-05	3.0229e-05	2.9194e-05	3.4968e-05	3.3217e-05
0.4321	2.1608e-05	2.895e-05	3.5328e-05	5.4873e-05	2.6693e-05	2.725e-05	3.0109e-05	3.4364e-05	2.9442e-05	2.8438e-05	3.4059e-05	3.2362e-05
0.4223	2.0986e-05	2.8171e-05	3.4388e-05	5.3398e-05	2.5975e-05	2.6538e-05	2.9332e-05	3.3474e-05	2.8676e-05	2.7702e-05	3.3173e-05	3.1529e-05
0.4127	2.0382e-05	2.7413e-05	3.3473e-05	5.1961e-05	2.5277e-05	2.5845e-05	2.8576e-05	3.2607e-05	2.793e-05	2.6984e-05	3.231e-05	3.0717e-05
0.4033	1.9795e-05	2.6676e-05	3.2582e-05	5.056e-05	2.4598e-05	2.517e-05	2.7839e-05	3.1763e-05	2.7203e-05	2.6285e-05	3.147e-05	2.9926e-05
0.3941	1.9225e-05	2.5958e-05	3.1714e-05	4.9196e-05	2.3936e-05	2.4512e-05	2.7121e-05	3.094e-05	2.6495e-05	2.5604e-05	3.0651e-05	2.9156e-05
0.3851	1.8671e-05	2.526e-05	3.087e-05	4.7866e-05	2.3293e-05	2.3872e-05	2.6422e-05	3.0139e-05	2.5805e-05	2.4941e-05	2.9853e-05	2.8405e-05
0.3764	1.8133e-05	2.458e-05	3.0048e-05	4.6571e-05	2.2667e-05	2.3248e-05	2.574e-05	2.9358e-05	2.5133e-05	2.4295e-05	2.9077e-05	2.7673e-05
0.3678	1.7611e-05	2.3919e-05	2.9248e-05	4.5309e-05	2.2057e-05	2.2641e-05	2.5077e-05	2.8597e-05	2.4479e-05	2.3665e-05	2.832e-05	2.696e-05
0.3594	1.7104e-05	2.3276e-05	2.8468e-05	4.4079e-05	2.1464e-05	2.205e-05	2.443e-05	2.7856e-05	2.3842e-05	2.3052e-05	2.7583e-05	2.6266e-05
0.3512	1.6611e-05	2.265e-05	2.771e-05	4.2882e-05	2.0887e-05	2.1474e-05	2.38e-05	2.7134e-05	2.3221e-05	2.2455e-05	2.6865e-05	2.5589e-05
0.3432	1.6133e-05	2.204e-05	2.6972e-05	4.1716e-05	2.0326e-05	2.0913e-05	2.3186e-05	2.643e-05	2.2617e-05	2.1873e-05	2.6166e-05	2.493e-05
0.3354	1.5668e-05	2.1447e-05	2.6253e-05	4.058e-05	1.9779e-05	2.0367e-05	2.2587e-05	2.5745e-05	2.2028e-05	2.1307e-05	2.5484e-05	2.4288e-05
0.3278	1.5217e-05	2.087e-05	2.5553e-05	3.9474e-05	1.9248e-05	1.9835e-05	2.2005e-05	2.5077e-05	2.1454e-05	2.0755e-05	2.4821e-05	2.3662e-05
0.3203	1.4779e-05	2.0309e-05	2.4872e-05	3.8397e-05	1.873e-05	1.9316e-05	2.1437e-05	2.4426e-05	2.0896e-05	2.0217e-05	2.4175e-05	2.3052e-05
0.313	1.4353e-05	1.9763e-05	2.4209e-05	3.7348e-05	1.8227e-05	1.8812e-05	2.0884e-05	2.3792e-05	2.0352e-05	1.9693e-05	2.3545e-05	2.2458e-05
0.3059	1.394e-05	1.9231e-05	2.3564e-05	3.6327e-05	1.7737e-05	1.832e-05	2.0345e-05	2.3175e-05	1.9822e-05	1.9183e-05	2.2932e-05	2.1879e-05
0.299	1.3538e-05	1.8713e-05	2.2935e-05	3.5333e-05	1.726e-05	1.7842e-05	1.982e-05	2.2574e-05	1.9306e-05	1.8686e-05	2.2335e-05	2.1315e-05
0.2921	1.3149e-05	1.821e-05	2.2324e-05	3.4365e-05	1.6796e-05	1.7376e-05	1.9308e-05	2.1988e-05	1.8803e-05	1.8202e-05	2.1753e-05	2.0766e-05
0.2855	1.277e-05	1.772e-05	2.1729e-05	3.3422e-05	1.6344e-05	1.6922e-05	1.881e-05	2.1417e-05	1.8313e-05	1.773e-05	2.1186e-05	2.023e-05
0.279	1.2402e-05	1.7243e-05	2.1149e-05	3.2505e-05	1.5905e-05	1.648e-05	1.8325e-05	2.0861e-05	1.7836e-05	1.7271e-05	2.0634e-05	1.9709e-05
0.2726	1.2045e-05	1.6779e-05	2.0585e-05	3.1612e-05	1.5477e-05	1.6049e-05	1.7852e-05	2.0319e-05	1.7372e-05	1.6823e-05	2.0097e-05	1.9201e-05
0.2664	1.1698e-05	1.6328e-05	2.0036e-05	3.0743e-05	1.5061e-05	1.563e-05	1.7391e-05	1.9791e-05	1.692e-05	1.6387e-05	1.9573e-05	1.8706e-05
0.2604	1.1361e-05	1.5889e-05	1.9501e-05	2.9897e-05	1.4656e-05	1.5221e-05	1.6942e-05	1.9277e-05	1.6479e-05	1.5963e-05	1.9063e-05	1.8223e-05
0.2544	1.1034e-05	1.5461e-05	1.8981e-05	2.9074e-05	1.4262e-05	1.4824e-05	1.6504e-05	1.8776e-05	1.605e-05	1.5549e-05	1.8566e-05	1.7753e-05
0.2487	1.0716e-05	1.5045e-05	1.8475e-05	2.8272e-05	1.3879e-05	1.4436e-05	1.6078e-05	1.8288e-05	1.5632e-05	1.5146e-05	1.8083e-05	1.7296e-05
0.243	1.0408e-05	1.464e-05	1.7982e-05	2.7492e-05	1.3506e-05	1.4059e-05	1.5663e-05	1.7813e-05	1.5225e-05	1.4754e-05	1.7611e-05	1.685e-05
0.2375	1.0108e-05	1.4247e-05	1.7502e-05	2.6734e-05	1.3142e-05	1.3692e-05	1.5259e-05	1.735e-05	1.4828e-05	1.4371e-05	1.7152e-05	1.6415e-05
0.2321	9.8168e-06	1.3863e-05	1.7035e-05	2.5995e-05	1.2789e-05	1.3334e-05	1.4865e-05	1.6899e-05	1.4442e-05	1.3999e-05	1.6705e-05	1.5992e-05
0.2268	9.5341e-06	1.349e-05	1.658e-05	2.5276e-05	1.2445e-05	1.2986e-05	1.4481e-05	1.646e-05	1.4066e-05	1.3636e-05	1.627e-05	1.5579e-05
0.2216	9.2595e-06	1.3127e-05	1.6137e-05	2.4577e-05	1.2111e-05	1.2647e-05	1.4107e-05	1.6032e-05	1.37e-05	1.3283e-05	1.5846e-05	1.5177e-05
0.2166	8.9929e-06	1.2774e-05	1.5707e-05	2.3897e-05	1.1785e-05	1.2316e-05	1.3743e-05	1.5615e-05	1.3343e-05	1.2938e-05	1.5433e-05	1.4786e-05
0.2116	8.7339e-06	1.243e-05	1.5287e-05	2.3235e-05	1.1468e-05	1.1994e-05	1.3388e-05	1.5209e-05	1.2995e-05	1.2603e-05	1.5031e-05	1.4404e-05
0.2068	8.4823e-06	1.2096e-05	1.4879e-05	2.2591e-05	1.116e-05	1.1681e-05	1.3042e-05	1.4814e-05	1.2657e-05	1.2277e-05	1.4639e-05	1.4033e-05
0.2021	8.238e-06	1.177e-05	1.4482e-05	2.1965e-05	1.086e-05	1.1376e-05	1.2705e-05	1.4429e-05	1.2327e-05	1.1958e-05	1.4257e-05	1.3671e-05
0.1975	8.0008e-06	1.1454e-05	1.4095e-05	2.1355e-05	1.0568e-05	1.1078e-05	1.2377e-05	1.4053e-05	1.2006e-05	1.1648e-05	1.3885e-05	1.3318e-05
0.193	7.7704e-06	1.1145e-05	1.3719e-05	2.0762e-05	1.0284e-05	1.0789e-05	1.2058e-05	1.3688e-05	1.1693e-05	1.1347e-05	1.3523e-05	1.2974e-05
0.1886	7.5466e-06	1.0846e-05	1.3353e-05	2.0185e-05	1.0007e-05	1.0507e-05	1.1746e-05	1.3332e-05	1.1389e-05	1.1053e-05	1.3171e-05	1.264e-05
0.1843	7.3293e-06	1.0554e-05	1.2996e-05	1.9624e-05	9.738e-06	1.0232e-05	1.1443e-05	1.2985e-05	1.1092e-05	1.0766e-05	1.2827e-05	1.2313e-05
0.1801	7.1182e-06	1.027e-05	1.2649e-05	1.9078e-05	9.4762e-06	9.9651e-06	1.1147e-05	1.2647e-05	1.0803e-05	1.0487e-05	1.2493e-05	1.1996e-05
0.176	6.9132e-06	9.9934e-06	1.2311e-05	1.8548e-05	9.2214e-06	9.7047e-06	1.0859e-05	1.2318e-05	1.0522e-05	1.0215e-05	1.2167e-05	1.1686e-05
0.172	6.7141e-06	9.7245e-06	1.1982e-05	1.8031e-05	8.9734e-06	9.4511e-06	1.0579e-05	1.1997e-05	1.0248e-05	9.9505e-06	1.185e-05	1.1385e-05
0.1681	6.5207e-06	9.4629e-06	1.1662e-05	1.7529e-05	8.7322e-06	9.2042e-06	1.0306e-05	1.1685e-05	9.9806e-06	9.6926e-06	1.1541e-05	1.1091e-05
0.1643	6.3329e-06	9.2082e-06	1.1351e-05	1.7041e-05	8.4974e-06	8.9637e-06	1.0039e-05	1.1381e-05	9.7206e-06	9.4414e-06	1.124e-05	1.0805e-05
0.1605	6.1505e-06	8.9605e-06	1.1047e-05	1.6565e-05	8.2689e-06	8.7294e-06	9.78e-06	1.1085e-05	9.4674e-06	9.1967e-06	1.0946e-05	1.0526e-05
0.1569	5.9734e-06	8.7193e-06	1.0752e-05	1.6103e-05	8.0466e-06	8.5013e-06	9.5273e-06	1.0796e-05	9.2208e-06	8.9584e-06	1.0661e-05	1.0254e-05
0.1533	5.8014e-06	8.4847e-06	1.0465e-05	1.5654e-05	7.8302e-06	8.2792e-06	9.2812e-06	1.0515e-05	8.9806e-06	8.7262e-06	1.0383e-05	9.9894e-06
0.1498	5.6343e-06	8.2564e-06	1.0185e-05	1.5217e-05	7.6197e-06	8.0628e-06	9.0414e-06	1.0242e-05	8.7466e-06	8.5e-06	1.0112e-05	9.7316e-06
0.1464	5.472e-06	8.0342e-06	9.9132e-06	1.4792e-05	7.4148e-06	7.8521e-06	8.8078e-06	9.9749e-06	8.5187e-06	8.2797e-06	9.8482e-06	9.4804e-06
0.1431	5.3144e-06	7.818e-06	9.6483e-06	1.4379e-05	7.2154e-06	7.6469e-06	8.5803e-06	9.7152e-06	8.2968e-06	8.0651e-06	9.5913e-06	9.2357e-06
0.1398	5.1614e-06	7.6077e-06	9.3905e-06	1.3977e-05	7.0214e-06	7.4471e-06	8.3586e-06	9.4622e-06	8.0806e-06	7.8561e-06	9.3411e-06	8.9973e-06
0.1366	5.0127e-06	7.4029e-06	9.1395e-06	1.3586e-05	6.8326e-06	7.2525e-06	8.1426e-06	9.2158e-06	7.8701e-06	7.6525e-06	9.0974e-06	8.765e-06
0.1335	4.8683e-06	7.2037e-06	8.8953e-06	1.3206e-05	6.6489e-06	7.063e-06	7.9322e-06	8.9758e-06	7.6651e-06	7.4541e-06	8.86e-06	8.5388e-06
0.1305	4.7281e-06	7.0099e-06	8.6576e-06	1.2837e-05	6.4701e-06	6.8784e-06	7.7273e-06	8.7421e-06	7.4654e-06	7.2609e-06	8.6289e-06	8.3183e-06
0.1275	4.592e-06	6.8212e-06	8.4262e-06	1.2477e-05	6.2961e-06	6.6987e-06	7.5276e-06	8.5144e-06	7.2709e-06	7.0727e-06	8.4037e-06	8.1036e-06
0.1246	4.4597e-06	6.6377e-06	8.201e-06	1.2128e-05	6.1268e-06	6.5236e-06	7.3331e-06	8.2926e-06	7.0814e-06	6.8894e-06	8.1845e-06	7.8944e-06
0.1218	4.3313e-06	6.4591e-06	7.9818e-06	1.1788e-05	5.9621e-06	6.3531e-06	7.1436e-06	8.0766e-06	6.8969e-06	6.7108e-06	7.9709e-06	7.6906e-06
0.119	4.2065e-06	6.2853e-06	7.7684e-06	1.1458e-05	5.8018e-06	6.1871e-06	6.959e-06	7.8662e-06	6.7172e-06	6.5369e-06	7.7629e-06	7.492e-06
0.1163	4.0854e-06	6.1161e-06	7.5608e-06	1.1137e-05	5.6458e-06	6.0254e-06	6.7792e-06	7.6613e-06	6.5422e-06	6.3674e-06	7.5604e-06	7.2986e-06
0.1137	3.9677e-06	5.9515e-06	7.3587e-06	1.0825e-05	5.4939e-06	5.868e-06	6.604e-06	7.4617e-06	6.3718e-06	6.2024e-06	7.3631e-06	7.1101e-06
0.1111	3.8535e-06	5.7914e-06	7.162e-06	1.0521e-05	5.3462e-06	5.7146e-06	6.4333e-06	7.2673e-06	6.2058e-06	6.0416e-06	7.1709e-06	6.9266e-06
0.1085	3.7425e-06	5.6355e-06	6.9705e-06	1.0226e-05	5.2025e-06	5.5653e-06	6.2671e-06	7.078e-06	6.0441e-06	5.885e-06	6.9838e-06	6.7477e-06
0.1061	3.6347e-06	5.4839e-06	6.7842e-06	9.939e-06	5.0626e-06	5.4198e-06	6.1051e-06	6.8936e-06	5.8866e-06	5.7325e-06	6.8015e-06	6.5735e-06
0.1037	3.53e-06	5.3363e-06	6.6028e-06	9.6601e-06	4.9264e-06	5.2782e-06	5.9473e-06	6.714e-06	5.7332e-06	5.5839e-06	6.624e-06	6.4038e-06
0.1013	3.4283e-06	5.1927e-06	6.4263e-06	9.3889e-06	4.794e-06	5.1402e-06	5.7936e-06	6.539e-06	5.5838e-06	5.4392e-06	6.4512e-06	6.2384e-06
0.099	3.3296e-06	5.053e-06	6.2544e-06	9.1253e-06	4.6651e-06	5.0059e-06	5.6439e-06	6.3686e-06	5.4383e-06	5.2982e-06	6.2828e-06	6.0773e-06
0.0967	3.2337e-06	4.917e-06	6.0872e-06	8.869e-06	4.5396e-06	4.8751e-06	5.498e-06	6.2027e-06	5.2966e-06	5.1608e-06	6.1188e-06	5.9204e-06
0.0945	3.1406e-06	4.7847e-06	5.9245e-06	8.6198e-06	4.4176e-06	4.7477e-06	5.3559e-06	6.041e-06	5.1586e-06	5.0271e-06	5.9591e-06	5.7675e-06
0.0924	3.0501e-06	4.6559e-06	5.7661e-06	8.3776e-06	4.2988e-06	4.6236e-06	5.2175e-06	5.8836e-06	5.0242e-06	4.8968e-06	5.8036e-06	5.6186e-06
0.0903	2.9623e-06	4.5306e-06	5.6119e-06	8.1421e-06	4.1832e-06	4.5028e-06	5.0827e-06	5.7303e-06	4.8933e-06	4.7698e-06	5.6521e-06	5.4735e-06
0.0882	2.877e-06	4.4087e-06	5.4618e-06	7.9132e-06	4.0707e-06	4.3851e-06	4.9513e-06	5.5809e-06	4.7658e-06	4.6462e-06	5.5046e-06	5.3321e-06
0.0862	2.7941e-06	4.29e-06	5.3158e-06	7.6907e-06	3.9612e-06	4.2705e-06	4.8233e-06	5.4355e-06	4.6416e-06	4.5258e-06	5.3609e-06	5.1944e-06
0.0843	2.7136e-06	4.1746e-06	5.1736e-06	7.4744e-06	3.8547e-06	4.1589e-06	4.6987e-06	5.2938e-06	4.5207e-06	4.4084e-06	5.221e-06	5.0603e-06
0.0823	2.6355e-06	4.0623e-06	5.0353e-06	7.2641e-06	3.7511e-06	4.0502e-06	4.5772e-06	5.1558e-06	4.4029e-06	4.2942e-06	5.0847e-06	4.9296e-06
0.0805	2.5596e-06	3.9529e-06	4.9006e-06	7.0597e-06	3.6502e-06	3.9444e-06	4.4589e-06	5.0214e-06	4.2881e-06	4.1829e-06	4.952e-06	4.8023e-06
0.0786	2.4859e-06	3.8466e-06	4.7696e-06	6.8611e-06	3.552e-06	3.8413e-06	4.3436e-06	4.8905e-06	4.1764e-06	4.0744e-06	4.8227e-06	4.6782e-06
0.0768	2.4143e-06	3.743e-06	4.642e-06	6.6679e-06	3.4565e-06	3.7409e-06	4.2314e-06	4.763e-06	4.0676e-06	3.9688e-06	4.6968e-06	4.5574e-06
0.0751	2.3447e-06	3.6423e-06	4.5179e-06	6.4802e-06	3.3636e-06	3.6431e-06	4.122e-06	4.6388e-06	3.9616e-06	3.8659e-06	4.5742e-06	4.4397e-06
0.0734	2.2772e-06	3.5443e-06	4.3971e-06	6.2978e-06	3.2731e-06	3.5479e-06	4.0154e-06	4.5179e-06	3.8583e-06	3.7657e-06	4.4548e-06	4.325e-06
0.0717	2.2116e-06	3.4489e-06	4.2795e-06	6.1204e-06	3.1851e-06	3.4552e-06	3.9117e-06	4.4001e-06	3.7578e-06	3.6681e-06	4.3385e-06	4.2133e-06
0.0701	2.1479e-06	3.3561e-06	4.165e-06	5.948e-06	3.0995e-06	3.3649e-06	3.8105e-06	4.2854e-06	3.6599e-06	3.573e-06	4.2253e-06	4.1045e-06
0.0685	2.0861e-06	3.2658e-06	4.0536e-06	5.7804e-06	3.0161e-06	3.2769e-06	3.712e-06	4.1737e-06	3.5645e-06	3.4804e-06	4.115e-06	3.9985e-06
0.0669	2.026e-06	3.1779e-06	3.9452e-06	5.6176e-06	2.935e-06	3.1913e-06	3.6161e-06	4.0649e-06	3.4716e-06	3.3902e-06	4.0076e-06	3.8952e-06
0.0654	1.9676e-06	3.0924e-06	3.8397e-06	5.4593e-06	2.8561e-06	3.1079e-06	3.5226e-06	3.9589e-06	3.3812e-06	3.3023e-06	3.9029e-06	3.7946e-06
0.0639	1.911e-06	3.0091e-06	3.737e-06	5.3054e-06	2.7793e-06	3.0267e-06	3.4315e-06	3.8557e-06	3.293e-06	3.2167e-06	3.801e-06	3.6966e-06
0.0625	1.8559e-06	2.9282e-06	3.637e-06	5.1559e-06	2.7046e-06	2.9476e-06	3.3428e-06	3.7551e-06	3.2072e-06	3.1333e-06	3.7018e-06	3.6011e-06
0.061	1.8025e-06	2.8494e-06	3.5397e-06	5.0105e-06	2.6318e-06	2.8705e-06	3.2564e-06	3.6572e-06	3.1237e-06	3.0521e-06	3.6052e-06	3.5081e-06
0.0596	1.7506e-06	2.7727e-06	3.4451e-06	4.8692e-06	2.5611e-06	2.7955e-06	3.1722e-06	3.5618e-06	3.0423e-06	2.973e-06	3.511e-06	3.4175e-06
0.0583	1.7001e-06	2.6981e-06	3.3529e-06	4.7319e-06	2.4922e-06	2.7224e-06	3.0902e-06	3.469e-06	2.963e-06	2.8959e-06	3.4194e-06	3.3292e-06
0.057	1.6512e-06	2.6255e-06	3.2632e-06	4.5985e-06	2.4252e-06	2.6513e-06	3.0104e-06	3.3785e-06	2.8858e-06	2.8208e-06	3.3301e-06	3.2432e-06
0.0557	1.6036e-06	2.5548e-06	3.1759e-06	4.4688e-06	2.36e-06	2.582e-06	2.9325e-06	3.2904e-06	2.8106e-06	2.7477e-06	3.2432e-06	3.1594e-06
0.0544	1.5574e-06	2.486e-06	3.091e-06	4.3427e-06	2.2965e-06	2.5145e-06	2.8567e-06	3.2046e-06	2.7373e-06	2.6765e-06	3.1585e-06	3.0778e-06
0.0532	1.5126e-06	2.4191e-06	3.0083e-06	4.2202e-06	2.2348e-06	2.4488e-06	2.7829e-06	3.121e-06	2.666e-06	2.6071e-06	3.076e-06	2.9983e-06
0.052	1.469e-06	2.354e-06	2.9278e-06	4.1011e-06	2.1747e-06	2.3848e-06	2.7109e-06	3.0396e-06	2.5965e-06	2.5395e-06	2.9957e-06	2.9209e-06
0.0508	1.4267e-06	2.2907e-06	2.8495e-06	3.9854e-06	2.1162e-06	2.3225e-06	2.6408e-06	2.9604e-06	2.5289e-06	2.4737e-06	2.9175e-06	2.8454e-06
0.0496	1.3856e-06	2.229e-06	2.7733e-06	3.8729e-06	2.0593e-06	2.2618e-06	2.5726e-06	2.8831e-06	2.4629e-06	2.4096e-06	2.8413e-06	2.7719e-06
0.0485	1.3457e-06	2.169e-06	2.6991e-06	3.7636e-06	2.0039e-06	2.2027e-06	2.5061e-06	2.808e-06	2.3988e-06	2.3471e-06	2.7671e-06	2.7003e-06
0.0474	1.307e-06	2.1107e-06	2.6269e-06	3.6574e-06	1.95e-06	2.1451e-06	2.4413e-06	2.7347e-06	2.3363e-06	2.2862e-06	2.6949e-06	2.6306e-06
0.0463	1.2693e-06	2.0539e-06	2.5566e-06	3.5541e-06	1.8976e-06	2.089e-06	2.3782e-06	2.6634e-06	2.2754e-06	2.227e-06	2.6245e-06	2.5626e-06
0.0452	1.2328e-06	1.9986e-06	2.4882e-06	3.4538e-06	1.8466e-06	2.0344e-06	2.3167e-06	2.5939e-06	2.2161e-06	2.1692e-06	2.556e-06	2.4964e-06
0.0442	1.1973e-06	1.9448e-06	2.4217e-06	3.3562e-06	1.7969e-06	1.9813e-06	2.2568e-06	2.5263e-06	2.1583e-06	2.113e-06	2.4892e-06	2.4319e-06
0.0432	1.1628e-06	1.8925e-06	2.3569e-06	3.2615e-06	1.7486e-06	1.9295e-06	2.1984e-06	2.4604e-06	2.1021e-06	2.0582e-06	2.4242e-06	2.3691e-06
0.0422	1.1293e-06	1.8415e-06	2.2938e-06	3.1693e-06	1.7016e-06	1.879e-06	2.1416e-06	2.3962e-06	2.0473e-06	2.0049e-06	2.3609e-06	2.3079e-06
0.0413	1.0968e-06	1.792e-06	2.2324e-06	3.0798e-06	1.6558e-06	1.8299e-06	2.0862e-06	2.3337e-06	1.9939e-06	1.9529e-06	2.2993e-06	2.2483e-06
0.0403	1.0652e-06	1.7438e-06	2.1727e-06	2.9928e-06	1.6113e-06	1.7821e-06	2.0323e-06	2.2728e-06	1.942e-06	1.9023e-06	2.2393e-06	2.1902e-06
0.0394	1.0345e-06	1.6968e-06	2.1146e-06	2.9083e-06	1.5679e-06	1.7355e-06	1.9798e-06	2.2135e-06	1.8914e-06	1.853e-06	2.1808e-06	2.1336e-06
0.0385	1.0047e-06	1.6512e-06	2.058e-06	2.8261e-06	1.5258e-06	1.6902e-06	1.9286e-06	2.1558e-06	1.8421e-06	1.8049e-06	2.1238e-06	2.0785e-06
0.0376	9.7576e-07	1.6067e-06	2.003e-06	2.7463e-06	1.4848e-06	1.646e-06	1.8787e-06	2.0996e-06	1.7941e-06	1.7581e-06	2.0684e-06	2.0248e-06
0.0368	9.4766e-07	1.5635e-06	1.9494e-06	2.6687e-06	1.4448e-06	1.603e-06	1.8301e-06	2.0448e-06	1.7473e-06	1.7126e-06	2.0144e-06	1.9725e-06
0.0359	9.2037e-07	1.5214e-06	1.8972e-06	2.5933e-06	1.406e-06	1.5611e-06	1.7828e-06	1.9915e-06	1.7018e-06	1.6682e-06	1.9618e-06	1.9215e-06
0.0351	8.9386e-07	1.4805e-06	1.8465e-06	2.52e-06	1.3682e-06	1.5203e-06	1.7367e-06	1.9395e-06	1.6574e-06	1.6249e-06	1.9105e-06	1.8719e-06
0.0343	8.6812e-07	1.4406e-06	1.7971e-06	2.4488e-06	1.3314e-06	1.4805e-06	1.6918e-06	1.8889e-06	1.6142e-06	1.5828e-06	1.8607e-06	1.8235e-06
0.0335	8.4311e-07	1.4018e-06	1.749e-06	2.3796e-06	1.2956e-06	1.4418e-06	1.6481e-06	1.8396e-06	1.5722e-06	1.5418e-06	1.8121e-06	1.7764e-06
0.0328	8.1883e-07	1.3641e-06	1.7022e-06	2.3123e-06	1.2607e-06	1.4042e-06	1.6055e-06	1.7916e-06	1.5312e-06	1.5018e-06	1.7648e-06	1.7305e-06
0.032	7.9525e-07	1.3274e-06	1.6566e-06	2.247e-06	1.2268e-06	1.3675e-06	1.564e-06	1.7449e-06	1.4913e-06	1.4629e-06	1.7187e-06	1.6858e-06
0.0313	7.7234e-07	1.2917e-06	1.6123e-06	2.1834e-06	1.1938e-06	1.3317e-06	1.5235e-06	1.6994e-06	1.4524e-06	1.4249e-06	1.6738e-06	1.6422e-06
	Pore accumulated frequency (θ/α)
Depth	0-10 cm				10-20 cm				20-30 cm
Treatment / Pore size (µm)	MTC	NT	NTC4	NTC8	MTC	NT	NTC4	NTC8	MTC	NT	NTC4	NTC8
3059.15	1	1	1	1	1	1	1	1	1	1	1	1
2989.51	0.9996	0.9999	1	1	0.9998	0.9999	1	1	0.9999	0.9999	1	1
2921.46	0.9991	0.9997	1	1	0.9996	0.9998	0.9999	1	0.9999	0.9998	1	1
2854.96	0.9986	0.9996	1	1	0.9993	0.9997	0.9999	1	0.9998	0.9997	0.9999	0.9999
2789.98	0.9982	0.9994	0.9999	1	0.9991	0.9995	0.9999	1	0.9997	0.9996	0.9999	0.9999
2726.47	0.9977	0.9992	0.9999	1	0.9988	0.9994	0.9999	0.9999	0.9997	0.9995	0.9999	0.9999
2664.41	0.9972	0.9991	0.9999	1	0.9986	0.9993	0.9998	0.9999	0.9996	0.9994	0.9999	0.9998
2603.76	0.9966	0.9989	0.9999	1	0.9983	0.9991	0.9998	0.9999	0.9995	0.9992	0.9998	0.9998
2544.49	0.9961	0.9987	0.9999	1	0.9981	0.999	0.9998	0.9999	0.9995	0.9991	0.9998	0.9998
2486.57	0.9956	0.9985	0.9999	1	0.9978	0.9989	0.9997	0.9999	0.9994	0.999	0.9998	0.9998
2429.97	0.995	0.9984	0.9998	1	0.9975	0.9987	0.9997	0.9999	0.9993	0.9989	0.9998	0.9997
2374.66	0.9945	0.9982	0.9998	1	0.9972	0.9986	0.9996	0.9999	0.9992	0.9987	0.9997	0.9997
2320.6	0.9939	0.998	0.9998	1	0.997	0.9984	0.9996	0.9999	0.9992	0.9986	0.9997	0.9997
2267.78	0.9933	0.9978	0.9998	1	0.9967	0.9983	0.9996	0.9998	0.9991	0.9985	0.9997	0.9996
2216.16	0.9927	0.9976	0.9998	1	0.9964	0.9981	0.9995	0.9998	0.999	0.9983	0.9997	0.9996
2165.71	0.992	0.9974	0.9997	1	0.996	0.998	0.9995	0.9998	0.9989	0.9982	0.9996	0.9996
2116.41	0.9914	0.9972	0.9997	1	0.9957	0.9978	0.9994	0.9998	0.9988	0.9981	0.9996	0.9995
2068.24	0.9907	0.9969	0.9997	1	0.9954	0.9976	0.9994	0.9998	0.9987	0.9979	0.9996	0.9995
2021.16	0.9901	0.9967	0.9997	1	0.9951	0.9975	0.9994	0.9998	0.9986	0.9977	0.9995	0.9995
1975.15	0.9894	0.9965	0.9996	1	0.9947	0.9973	0.9993	0.9997	0.9985	0.9976	0.9995	0.9994
1930.19	0.9887	0.9962	0.9996	1	0.9944	0.9971	0.9993	0.9997	0.9984	0.9974	0.9995	0.9994
1886.26	0.988	0.996	0.9996	1	0.994	0.9969	0.9992	0.9997	0.9983	0.9973	0.9994	0.9993
1843.32	0.9872	0.9958	0.9996	1	0.9937	0.9967	0.9992	0.9997	0.9982	0.9971	0.9994	0.9993
1801.36	0.9865	0.9955	0.9995	1	0.9933	0.9965	0.9991	0.9997	0.9981	0.9969	0.9994	0.9993
1760.36	0.9857	0.9952	0.9995	1	0.9929	0.9963	0.9991	0.9997	0.998	0.9968	0.9993	0.9992
1720.29	0.9849	0.995	0.9995	1	0.9925	0.9961	0.999	0.9996	0.9979	0.9966	0.9993	0.9992
1681.13	0.9841	0.9947	0.9995	1	0.9921	0.9959	0.999	0.9996	0.9978	0.9964	0.9992	0.9991
1642.86	0.9833	0.9944	0.9994	1	0.9917	0.9957	0.9989	0.9996	0.9977	0.9962	0.9992	0.9991
1605.46	0.9824	0.9941	0.9994	0.9999	0.9913	0.9955	0.9989	0.9996	0.9976	0.996	0.9992	0.999
1568.92	0.9816	0.9939	0.9994	0.9999	0.9909	0.9953	0.9988	0.9995	0.9975	0.9958	0.9991	0.999
1533.21	0.9807	0.9936	0.9993	0.9999	0.9904	0.995	0.9987	0.9995	0.9973	0.9956	0.9991	0.9989
1498.31	0.9798	0.9932	0.9993	0.9999	0.99	0.9948	0.9987	0.9995	0.9972	0.9954	0.999	0.9989
1464.2	0.9789	0.9929	0.9993	0.9999	0.9895	0.9946	0.9986	0.9995	0.9971	0.9952	0.999	0.9988
1430.87	0.978	0.9926	0.9992	0.9999	0.9891	0.9943	0.9985	0.9995	0.9969	0.995	0.9989	0.9988
1398.3	0.977	0.9923	0.9992	0.9999	0.9886	0.9941	0.9985	0.9994	0.9968	0.9947	0.9989	0.9987
1366.47	0.976	0.9919	0.9992	0.9999	0.9881	0.9938	0.9984	0.9994	0.9967	0.9945	0.9988	0.9987
1335.37	0.975	0.9916	0.9991	0.9999	0.9876	0.9936	0.9983	0.9994	0.9965	0.9943	0.9988	0.9986
1304.97	0.974	0.9912	0.9991	0.9999	0.9871	0.9933	0.9983	0.9994	0.9964	0.994	0.9987	0.9985
1275.27	0.973	0.9909	0.9991	0.9999	0.9866	0.993	0.9982	0.9993	0.9962	0.9938	0.9987	0.9985
1246.24	0.9719	0.9905	0.999	0.9999	0.986	0.9927	0.9981	0.9993	0.9961	0.9936	0.9986	0.9984
1217.87	0.9709	0.9901	0.999	0.9999	0.9855	0.9924	0.998	0.9993	0.9959	0.9933	0.9986	0.9984
1190.15	0.9698	0.9897	0.9989	0.9999	0.9849	0.9922	0.998	0.9992	0.9957	0.993	0.9985	0.9983
1163.06	0.9686	0.9894	0.9989	0.9999	0.9844	0.9919	0.9979	0.9992	0.9956	0.9928	0.9984	0.9982
1136.58	0.9675	0.9889	0.9988	0.9999	0.9838	0.9915	0.9978	0.9992	0.9954	0.9925	0.9984	0.9982
1110.71	0.9663	0.9885	0.9988	0.9999	0.9832	0.9912	0.9977	0.9991	0.9952	0.9922	0.9983	0.9981
1085.43	0.9652	0.9881	0.9988	0.9999	0.9826	0.9909	0.9976	0.9991	0.995	0.9919	0.9982	0.998
1060.72	0.9639	0.9877	0.9987	0.9999	0.982	0.9906	0.9975	0.9991	0.9949	0.9916	0.9982	0.9979
1036.57	0.9627	0.9872	0.9987	0.9999	0.9814	0.9902	0.9975	0.999	0.9947	0.9913	0.9981	0.9979
1012.98	0.9615	0.9868	0.9986	0.9999	0.9807	0.9899	0.9974	0.999	0.9945	0.991	0.998	0.9978
989.921	0.9602	0.9863	0.9986	0.9999	0.9801	0.9896	0.9973	0.999	0.9943	0.9907	0.998	0.9977
967.388	0.9589	0.9858	0.9985	0.9999	0.9794	0.9892	0.9972	0.9989	0.9941	0.9904	0.9979	0.9976
945.367	0.9576	0.9854	0.9984	0.9999	0.9788	0.9888	0.9971	0.9989	0.9939	0.9901	0.9978	0.9975
923.848	0.9563	0.9849	0.9984	0.9999	0.9781	0.9885	0.997	0.9989	0.9937	0.9898	0.9977	0.9974
902.819	0.9549	0.9844	0.9983	0.9999	0.9774	0.9881	0.9969	0.9988	0.9934	0.9894	0.9977	0.9974
882.268	0.9535	0.9839	0.9983	0.9998	0.9767	0.9877	0.9967	0.9988	0.9932	0.9891	0.9976	0.9973
862.185	0.9521	0.9833	0.9982	0.9998	0.9759	0.9873	0.9966	0.9987	0.993	0.9887	0.9975	0.9972
842.559	0.9507	0.9828	0.9982	0.9998	0.9752	0.9869	0.9965	0.9987	0.9928	0.9884	0.9974	0.9971
823.38	0.9492	0.9822	0.9981	0.9998	0.9744	0.9865	0.9964	0.9986	0.9925	0.988	0.9973	0.997
804.638	0.9478	0.9817	0.998	0.9998	0.9737	0.986	0.9963	0.9986	0.9923	0.9876	0.9972	0.9969
786.322	0.9463	0.9811	0.998	0.9998	0.9729	0.9856	0.9962	0.9985	0.992	0.9872	0.9971	0.9968
768.423	0.9447	0.9805	0.9979	0.9998	0.9721	0.9852	0.996	0.9985	0.9918	0.9868	0.997	0.9967
750.932	0.9432	0.9799	0.9978	0.9998	0.9713	0.9847	0.9959	0.9984	0.9915	0.9864	0.9969	0.9966
733.839	0.9416	0.9793	0.9977	0.9998	0.9705	0.9843	0.9958	0.9984	0.9912	0.986	0.9968	0.9964
717.134	0.9401	0.9787	0.9977	0.9998	0.9696	0.9838	0.9956	0.9983	0.991	0.9856	0.9967	0.9963
700.811	0.9384	0.9781	0.9976	0.9998	0.9688	0.9833	0.9955	0.9983	0.9907	0.9852	0.9966	0.9962
684.858	0.9368	0.9774	0.9975	0.9998	0.9679	0.9828	0.9954	0.9982	0.9904	0.9847	0.9965	0.9961
669.269	0.9352	0.9768	0.9974	0.9998	0.967	0.9823	0.9952	0.9982	0.9901	0.9843	0.9964	0.996
654.034	0.9335	0.9761	0.9973	0.9998	0.9661	0.9818	0.9951	0.9981	0.9898	0.9839	0.9963	0.9958
639.147	0.9318	0.9754	0.9973	0.9998	0.9652	0.9813	0.9949	0.9981	0.9895	0.9834	0.9962	0.9957
624.598	0.9301	0.9747	0.9972	0.9997	0.9643	0.9808	0.9948	0.998	0.9892	0.9829	0.9961	0.9956
610.38	0.9283	0.974	0.9971	0.9997	0.9634	0.9803	0.9946	0.9979	0.9889	0.9824	0.9959	0.9954
596.486	0.9266	0.9733	0.997	0.9997	0.9624	0.9797	0.9944	0.9979	0.9886	0.982	0.9958	0.9953
582.909	0.9248	0.9725	0.9969	0.9997	0.9614	0.9792	0.9943	0.9978	0.9882	0.9815	0.9957	0.9952
569.64	0.923	0.9718	0.9968	0.9997	0.9605	0.9786	0.9941	0.9977	0.9879	0.981	0.9956	0.995
556.673	0.9212	0.971	0.9967	0.9997	0.9595	0.978	0.9939	0.9977	0.9875	0.9804	0.9954	0.9949
544.002	0.9193	0.9703	0.9966	0.9997	0.9584	0.9774	0.9937	0.9976	0.9872	0.9799	0.9953	0.9947
531.619	0.9175	0.9695	0.9965	0.9997	0.9574	0.9768	0.9935	0.9975	0.9868	0.9794	0.9951	0.9946
519.518	0.9156	0.9687	0.9964	0.9997	0.9564	0.9762	0.9934	0.9974	0.9864	0.9788	0.995	0.9944
507.692	0.9137	0.9678	0.9963	0.9997	0.9553	0.9756	0.9932	0.9974	0.9861	0.9783	0.9949	0.9942
496.136	0.9118	0.967	0.9961	0.9996	0.9543	0.975	0.993	0.9973	0.9857	0.9777	0.9947	0.9941
484.842	0.9098	0.9662	0.996	0.9996	0.9532	0.9743	0.9928	0.9972	0.9853	0.9771	0.9945	0.9939
473.806	0.9079	0.9653	0.9959	0.9996	0.9521	0.9737	0.9926	0.9971	0.9849	0.9766	0.9944	0.9937
463.021	0.9059	0.9644	0.9958	0.9996	0.951	0.973	0.9923	0.997	0.9845	0.976	0.9942	0.9935
452.481	0.9039	0.9635	0.9957	0.9996	0.9498	0.9723	0.9921	0.9969	0.9841	0.9754	0.9941	0.9934
442.182	0.9019	0.9626	0.9955	0.9996	0.9487	0.9717	0.9919	0.9968	0.9836	0.9747	0.9939	0.9932
432.116	0.8999	0.9617	0.9954	0.9996	0.9475	0.971	0.9917	0.9968	0.9832	0.9741	0.9937	0.993
422.28	0.8978	0.9608	0.9953	0.9996	0.9463	0.9703	0.9914	0.9967	0.9827	0.9735	0.9935	0.9928
412.668	0.8958	0.9598	0.9951	0.9995	0.9452	0.9695	0.9912	0.9966	0.9823	0.9728	0.9933	0.9926
403.274	0.8937	0.9588	0.995	0.9995	0.944	0.9688	0.991	0.9965	0.9818	0.9722	0.9932	0.9924
394.095	0.8916	0.9579	0.9948	0.9995	0.9427	0.9681	0.9907	0.9964	0.9814	0.9715	0.993	0.9922
385.124	0.8895	0.9569	0.9947	0.9995	0.9415	0.9673	0.9905	0.9963	0.9809	0.9708	0.9928	0.9919
376.358	0.8873	0.9559	0.9945	0.9995	0.9403	0.9665	0.9902	0.9962	0.9804	0.9701	0.9926	0.9917
367.791	0.8852	0.9548	0.9944	0.9995	0.939	0.9658	0.9899	0.996	0.9799	0.9694	0.9923	0.9915
359.419	0.8831	0.9538	0.9942	0.9995	0.9377	0.965	0.9897	0.9959	0.9794	0.9687	0.9921	0.9913
351.237	0.8809	0.9527	0.994	0.9994	0.9364	0.9642	0.9894	0.9958	0.9789	0.968	0.9919	0.991
343.242	0.8787	0.9517	0.9939	0.9994	0.9352	0.9634	0.9891	0.9957	0.9783	0.9673	0.9917	0.9908
335.429	0.8765	0.9506	0.9937	0.9994	0.9338	0.9625	0.9888	0.9956	0.9778	0.9665	0.9915	0.9905
327.794	0.8743	0.9495	0.9935	0.9994	0.9325	0.9617	0.9885	0.9954	0.9772	0.9657	0.9912	0.9903
320.332	0.8721	0.9484	0.9933	0.9994	0.9312	0.9609	0.9882	0.9953	0.9767	0.965	0.991	0.99
313.041	0.8699	0.9472	0.9931	0.9993	0.9298	0.96	0.9879	0.9952	0.9761	0.9642	0.9907	0.9898
305.915	0.8676	0.9461	0.9929	0.9993	0.9285	0.9591	0.9876	0.9951	0.9755	0.9634	0.9905	0.9895
298.951	0.8654	0.9449	0.9927	0.9993	0.9271	0.9583	0.9873	0.9949	0.9749	0.9626	0.9902	0.9892
292.146	0.8631	0.9438	0.9925	0.9993	0.9257	0.9574	0.9869	0.9948	0.9743	0.9618	0.99	0.9889
285.496	0.8608	0.9426	0.9923	0.9993	0.9243	0.9565	0.9866	0.9946	0.9737	0.961	0.9897	0.9886
278.998	0.8586	0.9414	0.9921	0.9992	0.9229	0.9555	0.9863	0.9945	0.9731	0.9601	0.9894	0.9883
272.647	0.8563	0.9402	0.9919	0.9992	0.9215	0.9546	0.9859	0.9943	0.9725	0.9593	0.9892	0.988
266.441	0.854	0.9389	0.9917	0.9992	0.92	0.9537	0.9856	0.9942	0.9718	0.9584	0.9889	0.9877
260.376	0.8517	0.9377	0.9914	0.9992	0.9186	0.9527	0.9852	0.994	0.9712	0.9576	0.9886	0.9874
254.449	0.8494	0.9364	0.9912	0.9991	0.9171	0.9518	0.9848	0.9939	0.9705	0.9567	0.9883	0.9871
248.657	0.847	0.9352	0.991	0.9991	0.9156	0.9508	0.9844	0.9937	0.9698	0.9558	0.988	0.9868
242.997	0.8447	0.9339	0.9907	0.9991	0.9142	0.9498	0.984	0.9935	0.9691	0.9549	0.9877	0.9864
237.465	0.8424	0.9326	0.9905	0.9991	0.9127	0.9488	0.9836	0.9933	0.9684	0.954	0.9873	0.9861
232.06	0.84	0.9313	0.9902	0.999	0.9112	0.9478	0.9832	0.9932	0.9677	0.9531	0.987	0.9857
226.778	0.8377	0.9299	0.9899	0.999	0.9096	0.9468	0.9828	0.993	0.967	0.9521	0.9867	0.9854
221.616	0.8354	0.9286	0.9897	0.999	0.9081	0.9457	0.9824	0.9928	0.9663	0.9512	0.9863	0.985
216.571	0.833	0.9272	0.9894	0.9989	0.9066	0.9447	0.982	0.9926	0.9655	0.9502	0.986	0.9846
211.641	0.8306	0.9259	0.9891	0.9989	0.9051	0.9436	0.9815	0.9924	0.9648	0.9493	0.9856	0.9842
206.824	0.8283	0.9245	0.9888	0.9989	0.9035	0.9426	0.9811	0.9922	0.964	0.9483	0.9853	0.9839
202.116	0.8259	0.9231	0.9885	0.9988	0.9019	0.9415	0.9806	0.992	0.9632	0.9473	0.9849	0.9835
197.515	0.8236	0.9217	0.9882	0.9988	0.9004	0.9404	0.9802	0.9918	0.9625	0.9463	0.9845	0.9831
193.019	0.8212	0.9203	0.9879	0.9988	0.8988	0.9393	0.9797	0.9916	0.9617	0.9453	0.9841	0.9826
188.626	0.8188	0.9188	0.9876	0.9987	0.8972	0.9382	0.9792	0.9913	0.9608	0.9443	0.9837	0.9822
184.332	0.8164	0.9174	0.9873	0.9987	0.8956	0.9371	0.9787	0.9911	0.96	0.9432	0.9833	0.9818
180.136	0.8141	0.9159	0.9869	0.9987	0.894	0.936	0.9782	0.9909	0.9592	0.9422	0.9829	0.9813
176.036	0.8117	0.9145	0.9866	0.9986	0.8924	0.9348	0.9777	0.9906	0.9583	0.9412	0.9825	0.9809
172.029	0.8093	0.913	0.9862	0.9986	0.8908	0.9337	0.9772	0.9904	0.9575	0.9401	0.982	0.9804
168.113	0.807	0.9115	0.9859	0.9985	0.8892	0.9325	0.9767	0.9902	0.9566	0.939	0.9816	0.98
164.286	0.8046	0.91	0.9855	0.9985	0.8875	0.9314	0.9761	0.9899	0.9557	0.938	0.9812	0.9795
160.546	0.8022	0.9085	0.9851	0.9984	0.8859	0.9302	0.9756	0.9896	0.9548	0.9369	0.9807	0.979
156.892	0.7998	0.907	0.9847	0.9984	0.8843	0.929	0.975	0.9894	0.9539	0.9358	0.9802	0.9785
153.321	0.7975	0.9055	0.9844	0.9984	0.8826	0.9278	0.9745	0.9891	0.953	0.9347	0.9798	0.978
149.831	0.7951	0.9039	0.984	0.9983	0.881	0.9266	0.9739	0.9888	0.9521	0.9335	0.9793	0.9775
146.42	0.7927	0.9024	0.9835	0.9983	0.8793	0.9254	0.9733	0.9885	0.9512	0.9324	0.9788	0.977
143.087	0.7904	0.9008	0.9831	0.9982	0.8776	0.9242	0.9727	0.9882	0.9502	0.9313	0.9783	0.9765
139.83	0.788	0.8992	0.9827	0.9981	0.876	0.923	0.9721	0.9879	0.9493	0.9301	0.9778	0.9759
136.647	0.7856	0.8977	0.9823	0.9981	0.8743	0.9217	0.9715	0.9876	0.9483	0.929	0.9772	0.9754
133.537	0.7833	0.8961	0.9818	0.998	0.8726	0.9205	0.9709	0.9873	0.9473	0.9278	0.9767	0.9748
130.497	0.7809	0.8945	0.9814	0.998	0.8709	0.9192	0.9702	0.987	0.9463	0.9267	0.9762	0.9743
127.526	0.7786	0.8929	0.9809	0.9979	0.8692	0.918	0.9696	0.9867	0.9453	0.9255	0.9756	0.9737
124.624	0.7762	0.8913	0.9804	0.9979	0.8675	0.9167	0.9689	0.9864	0.9443	0.9243	0.975	0.9731
121.787	0.7739	0.8897	0.9799	0.9978	0.8658	0.9154	0.9683	0.986	0.9433	0.9231	0.9745	0.9725
119.015	0.7715	0.888	0.9794	0.9977	0.8641	0.9141	0.9676	0.9857	0.9422	0.9219	0.9739	0.9719
116.306	0.7692	0.8864	0.9789	0.9977	0.8624	0.9128	0.9669	0.9853	0.9412	0.9207	0.9733	0.9713
113.658	0.7669	0.8848	0.9784	0.9976	0.8607	0.9115	0.9662	0.985	0.9401	0.9195	0.9727	0.9707
111.071	0.7645	0.8831	0.9779	0.9975	0.859	0.9102	0.9655	0.9846	0.9391	0.9183	0.9721	0.97
108.543	0.7622	0.8815	0.9773	0.9975	0.8573	0.9089	0.9648	0.9842	0.938	0.917	0.9714	0.9694
106.072	0.7599	0.8798	0.9768	0.9974	0.8556	0.9076	0.9641	0.9838	0.9369	0.9158	0.9708	0.9687
103.657	0.7576	0.8781	0.9762	0.9973	0.8539	0.9063	0.9633	0.9834	0.9358	0.9146	0.9701	0.9681
101.298	0.7553	0.8765	0.9757	0.9972	0.8522	0.905	0.9626	0.983	0.9347	0.9133	0.9695	0.9674
98.9921	0.753	0.8748	0.9751	0.9971	0.8504	0.9036	0.9618	0.9826	0.9336	0.9121	0.9688	0.9667
96.7388	0.7507	0.8731	0.9745	0.9971	0.8487	0.9023	0.961	0.9822	0.9325	0.9108	0.9681	0.966
94.5367	0.7484	0.8714	0.9739	0.997	0.847	0.9009	0.9603	0.9818	0.9313	0.9095	0.9674	0.9653
92.3848	0.7462	0.8697	0.9733	0.9969	0.8453	0.8996	0.9595	0.9813	0.9302	0.9082	0.9667	0.9646
90.2819	0.7439	0.868	0.9726	0.9968	0.8435	0.8982	0.9587	0.9809	0.929	0.907	0.966	0.9638
88.2268	0.7416	0.8663	0.972	0.9967	0.8418	0.8969	0.9578	0.9805	0.9279	0.9057	0.9653	0.9631
86.2185	0.7394	0.8646	0.9713	0.9966	0.8401	0.8955	0.957	0.98	0.9267	0.9044	0.9645	0.9623
84.2559	0.7371	0.8629	0.9707	0.9965	0.8384	0.8941	0.9562	0.9795	0.9255	0.9031	0.9638	0.9616
82.3381	0.7349	0.8612	0.97	0.9964	0.8366	0.8927	0.9553	0.979	0.9243	0.9018	0.963	0.9608
80.4638	0.7327	0.8595	0.9693	0.9963	0.8349	0.8914	0.9545	0.9786	0.9231	0.9005	0.9622	0.96
78.6322	0.7304	0.8578	0.9686	0.9962	0.8332	0.89	0.9536	0.9781	0.9219	0.8992	0.9615	0.9592
76.8423	0.7282	0.856	0.9679	0.9961	0.8315	0.8886	0.9528	0.9775	0.9207	0.8979	0.9607	0.9584
75.0932	0.726	0.8543	0.9672	0.996	0.8297	0.8872	0.9519	0.977	0.9195	0.8965	0.9598	0.9576
73.3839	0.7238	0.8526	0.9664	0.9959	0.828	0.8858	0.951	0.9765	0.9183	0.8952	0.959	0.9568
71.7134	0.7216	0.8509	0.9657	0.9957	0.8263	0.8844	0.9501	0.976	0.917	0.8939	0.9582	0.9559
70.081	0.7195	0.8491	0.9649	0.9956	0.8246	0.883	0.9491	0.9754	0.9158	0.8925	0.9573	0.9551
68.4858	0.7173	0.8474	0.9641	0.9955	0.8228	0.8816	0.9482	0.9749	0.9145	0.8912	0.9565	0.9542
66.9269	0.7151	0.8457	0.9633	0.9954	0.8211	0.8802	0.9473	0.9743	0.9133	0.8899	0.9556	0.9533
65.4034	0.713	0.8439	0.9625	0.9952	0.8194	0.8788	0.9463	0.9737	0.912	0.8885	0.9547	0.9525
63.9147	0.7108	0.8422	0.9617	0.9951	0.8177	0.8773	0.9454	0.9731	0.9107	0.8872	0.9538	0.9516
62.4598	0.7087	0.8404	0.9609	0.995	0.816	0.8759	0.9444	0.9725	0.9095	0.8858	0.9529	0.9507
61.038	0.7065	0.8387	0.96	0.9948	0.8142	0.8745	0.9434	0.9719	0.9082	0.8845	0.952	0.9498
59.6486	0.7044	0.837	0.9592	0.9947	0.8125	0.8731	0.9425	0.9713	0.9069	0.8831	0.9511	0.9488
58.2909	0.7023	0.8352	0.9583	0.9945	0.8108	0.8717	0.9415	0.9707	0.9056	0.8817	0.9502	0.9479
56.964	0.7002	0.8335	0.9574	0.9943	0.8091	0.8702	0.9405	0.97	0.9043	0.8804	0.9492	0.947
55.6674	0.6981	0.8317	0.9565	0.9942	0.8074	0.8688	0.9394	0.9694	0.903	0.879	0.9483	0.946
54.4002	0.696	0.83	0.9556	0.994	0.8057	0.8674	0.9384	0.9687	0.9017	0.8777	0.9473	0.9451
53.1619	0.694	0.8283	0.9547	0.9939	0.804	0.8659	0.9374	0.9681	0.9003	0.8763	0.9463	0.9441
51.9518	0.6919	0.8265	0.9537	0.9937	0.8023	0.8645	0.9364	0.9674	0.899	0.8749	0.9453	0.9431
50.7692	0.6898	0.8248	0.9528	0.9935	0.8006	0.8631	0.9353	0.9667	0.8977	0.8735	0.9443	0.9421
49.6136	0.6878	0.823	0.9518	0.9933	0.7989	0.8616	0.9342	0.966	0.8963	0.8722	0.9433	0.9411
48.4842	0.6858	0.8213	0.9508	0.9931	0.7972	0.8602	0.9332	0.9653	0.895	0.8708	0.9422	0.9401
47.3806	0.6837	0.8196	0.9498	0.9929	0.7955	0.8588	0.9321	0.9645	0.8937	0.8694	0.9412	0.9391
46.3021	0.6817	0.8178	0.9488	0.9927	0.7938	0.8573	0.931	0.9638	0.8923	0.868	0.9402	0.938
45.2481	0.6797	0.8161	0.9478	0.9925	0.7922	0.8559	0.9299	0.963	0.891	0.8666	0.9391	0.937
44.2182	0.6777	0.8143	0.9468	0.9923	0.7905	0.8545	0.9288	0.9623	0.8896	0.8653	0.938	0.936
43.2116	0.6757	0.8126	0.9457	0.9921	0.7888	0.853	0.9277	0.9615	0.8882	0.8639	0.9369	0.9349
42.228	0.6737	0.8109	0.9447	0.9919	0.7871	0.8516	0.9266	0.9607	0.8869	0.8625	0.9359	0.9338
41.2668	0.6718	0.8091	0.9436	0.9916	0.7855	0.8501	0.9255	0.9599	0.8855	0.8611	0.9347	0.9328
40.3274	0.6698	0.8074	0.9425	0.9914	0.7838	0.8487	0.9244	0.9591	0.8841	0.8597	0.9336	0.9317
39.4095	0.6679	0.8057	0.9414	0.9912	0.7821	0.8473	0.9232	0.9583	0.8828	0.8583	0.9325	0.9306
38.5124	0.6659	0.804	0.9403	0.9909	0.7805	0.8458	0.9221	0.9575	0.8814	0.8569	0.9314	0.9295
37.6358	0.664	0.8023	0.9392	0.9907	0.7788	0.8444	0.9209	0.9566	0.88	0.8556	0.9302	0.9284
36.7791	0.6621	0.8005	0.938	0.9904	0.7772	0.843	0.9198	0.9558	0.8786	0.8542	0.9291	0.9273
35.9419	0.6602	0.7988	0.9369	0.9901	0.7755	0.8415	0.9186	0.9549	0.8772	0.8528	0.9279	0.9261
35.1237	0.6583	0.7971	0.9357	0.9899	0.7739	0.8401	0.9174	0.9541	0.8758	0.8514	0.9267	0.925
34.3242	0.6564	0.7954	0.9346	0.9896	0.7723	0.8387	0.9163	0.9532	0.8744	0.85	0.9256	0.9239
33.5429	0.6545	0.7937	0.9334	0.9893	0.7706	0.8372	0.9151	0.9523	0.873	0.8486	0.9244	0.9227
32.7794	0.6526	0.792	0.9322	0.989	0.769	0.8358	0.9139	0.9514	0.8716	0.8472	0.9232	0.9216
32.0332	0.6508	0.7903	0.931	0.9887	0.7674	0.8344	0.9127	0.9505	0.8703	0.8459	0.922	0.9204
31.3041	0.6489	0.7886	0.9297	0.9884	0.7658	0.8329	0.9115	0.9495	0.8689	0.8445	0.9208	0.9192
30.5915	0.6471	0.7869	0.9285	0.9881	0.7641	0.8315	0.9103	0.9486	0.8675	0.8431	0.9195	0.9181
29.8951	0.6452	0.7852	0.9272	0.9877	0.7625	0.8301	0.9091	0.9476	0.866	0.8417	0.9183	0.9169
29.2146	0.6434	0.7835	0.926	0.9874	0.7609	0.8286	0.9078	0.9467	0.8646	0.8403	0.9171	0.9157
28.5496	0.6416	0.7818	0.9247	0.9871	0.7593	0.8272	0.9066	0.9457	0.8632	0.8389	0.9158	0.9145
27.8998	0.6398	0.7801	0.9234	0.9867	0.7577	0.8258	0.9054	0.9447	0.8618	0.8376	0.9145	0.9133
27.2647	0.638	0.7785	0.9221	0.9863	0.7561	0.8244	0.9041	0.9437	0.8604	0.8362	0.9133	0.9121
26.6441	0.6362	0.7768	0.9208	0.986	0.7545	0.823	0.9029	0.9427	0.859	0.8348	0.912	0.9109
26.0376	0.6345	0.7751	0.9195	0.9856	0.753	0.8215	0.9017	0.9417	0.8576	0.8334	0.9107	0.9096
25.4449	0.6327	0.7735	0.9182	0.9852	0.7514	0.8201	0.9004	0.9407	0.8562	0.832	0.9094	0.9084
24.8657	0.631	0.7718	0.9169	0.9848	0.7498	0.8187	0.8992	0.9397	0.8548	0.8307	0.9081	0.9072
24.2997	0.6292	0.7701	0.9155	0.9844	0.7482	0.8173	0.8979	0.9386	0.8534	0.8293	0.9068	0.9059
23.7466	0.6275	0.7685	0.9142	0.984	0.7467	0.8159	0.8966	0.9376	0.852	0.8279	0.9055	0.9047
23.206	0.6258	0.7668	0.9128	0.9835	0.7451	0.8145	0.8954	0.9365	0.8506	0.8265	0.9042	0.9035
22.6778	0.6241	0.7652	0.9114	0.9831	0.7436	0.8131	0.8941	0.9354	0.8492	0.8252	0.9029	0.9022
22.1616	0.6223	0.7636	0.91	0.9826	0.742	0.8117	0.8928	0.9343	0.8477	0.8238	0.9016	0.9009
21.6571	0.6207	0.7619	0.9086	0.9822	0.7405	0.8103	0.8916	0.9332	0.8463	0.8224	0.9002	0.8997
21.1641	0.619	0.7603	0.9072	0.9817	0.7389	0.8089	0.8903	0.9321	0.8449	0.8211	0.8989	0.8984
20.6824	0.6173	0.7587	0.9058	0.9812	0.7374	0.8075	0.889	0.931	0.8435	0.8197	0.8976	0.8971
20.2116	0.6156	0.757	0.9044	0.9807	0.7359	0.8061	0.8877	0.9299	0.8421	0.8184	0.8962	0.8959
19.7515	0.614	0.7554	0.903	0.9802	0.7343	0.8047	0.8864	0.9288	0.8407	0.817	0.8949	0.8946
19.3019	0.6123	0.7538	0.9015	0.9797	0.7328	0.8033	0.8852	0.9276	0.8393	0.8156	0.8935	0.8933
18.8626	0.6107	0.7522	0.9001	0.9792	0.7313	0.8019	0.8839	0.9265	0.8379	0.8143	0.8921	0.892
18.4332	0.6091	0.7506	0.8986	0.9786	0.7298	0.8005	0.8826	0.9253	0.8365	0.8129	0.8908	0.8907
18.0136	0.6074	0.749	0.8972	0.978	0.7283	0.7992	0.8813	0.9242	0.8351	0.8116	0.8894	0.8894
17.6036	0.6058	0.7474	0.8957	0.9775	0.7268	0.7978	0.88	0.923	0.8337	0.8102	0.888	0.8881
17.2029	0.6042	0.7458	0.8942	0.9769	0.7253	0.7964	0.8787	0.9218	0.8323	0.8089	0.8866	0.8868
16.8113	0.6026	0.7442	0.8927	0.9763	0.7238	0.795	0.8774	0.9206	0.8309	0.8076	0.8852	0.8855
16.4286	0.6011	0.7427	0.8913	0.9757	0.7223	0.7937	0.8761	0.9194	0.8295	0.8062	0.8839	0.8842
16.0546	0.5995	0.7411	0.8898	0.9751	0.7209	0.7923	0.8748	0.9182	0.8281	0.8049	0.8825	0.8829
15.6892	0.5979	0.7395	0.8883	0.9744	0.7194	0.7909	0.8734	0.917	0.8267	0.8035	0.8811	0.8816
15.3321	0.5964	0.738	0.8868	0.9738	0.7179	0.7896	0.8721	0.9158	0.8253	0.8022	0.8797	0.8803
14.9831	0.5948	0.7364	0.8852	0.9731	0.7165	0.7882	0.8708	0.9146	0.8239	0.8009	0.8783	0.879
14.642	0.5933	0.7348	0.8837	0.9724	0.715	0.7869	0.8695	0.9133	0.8225	0.7996	0.8768	0.8777
14.3087	0.5918	0.7333	0.8822	0.9717	0.7136	0.7855	0.8682	0.9121	0.8211	0.7982	0.8754	0.8763
13.983	0.5902	0.7318	0.8807	0.971	0.7121	0.7842	0.8669	0.9108	0.8197	0.7969	0.874	0.875
13.6647	0.5887	0.7302	0.8791	0.9703	0.7107	0.7828	0.8656	0.9096	0.8184	0.7956	0.8726	0.8737
13.3537	0.5872	0.7287	0.8776	0.9695	0.7092	0.7815	0.8643	0.9083	0.817	0.7943	0.8712	0.8724
13.0497	0.5857	0.7272	0.8761	0.9688	0.7078	0.7802	0.863	0.9071	0.8156	0.793	0.8698	0.8711
12.7527	0.5843	0.7256	0.8745	0.968	0.7064	0.7788	0.8616	0.9058	0.8142	0.7916	0.8684	0.8697
12.4624	0.5828	0.7241	0.873	0.9672	0.705	0.7775	0.8603	0.9045	0.8128	0.7903	0.8669	0.8684
12.1787	0.5813	0.7226	0.8714	0.9664	0.7036	0.7762	0.859	0.9032	0.8115	0.789	0.8655	0.8671
11.9015	0.5799	0.7211	0.8699	0.9656	0.7021	0.7749	0.8577	0.9019	0.8101	0.7877	0.8641	0.8657
11.6306	0.5784	0.7196	0.8683	0.9647	0.7007	0.7735	0.8564	0.9006	0.8087	0.7864	0.8627	0.8644
11.3658	0.577	0.7181	0.8667	0.9639	0.6993	0.7722	0.8551	0.8993	0.8074	0.7851	0.8612	0.8631
11.1071	0.5756	0.7166	0.8652	0.963	0.6979	0.7709	0.8537	0.898	0.806	0.7838	0.8598	0.8617
10.8543	0.5741	0.7151	0.8636	0.9621	0.6966	0.7696	0.8524	0.8967	0.8046	0.7826	0.8584	0.8604
10.6072	0.5727	0.7136	0.862	0.9612	0.6952	0.7683	0.8511	0.8954	0.8033	0.7813	0.8569	0.8591
10.3657	0.5713	0.7122	0.8604	0.9603	0.6938	0.767	0.8498	0.8941	0.8019	0.78	0.8555	0.8577
10.1298	0.5699	0.7107	0.8589	0.9593	0.6924	0.7657	0.8485	0.8928	0.8006	0.7787	0.8541	0.8564
9.8992	0.5685	0.7092	0.8573	0.9584	0.6911	0.7644	0.8472	0.8914	0.7992	0.7774	0.8526	0.8551
9.6739	0.5671	0.7078	0.8557	0.9574	0.6897	0.7631	0.8459	0.8901	0.7979	0.7761	0.8512	0.8537
9.4537	0.5658	0.7063	0.8541	0.9564	0.6883	0.7618	0.8445	0.8888	0.7965	0.7749	0.8498	0.8524
9.2385	0.5644	0.7049	0.8525	0.9554	0.687	0.7605	0.8432	0.8874	0.7952	0.7736	0.8483	0.8511
9.0282	0.5631	0.7034	0.8509	0.9544	0.6856	0.7592	0.8419	0.8861	0.7938	0.7723	0.8469	0.8497
8.8227	0.5617	0.702	0.8494	0.9533	0.6843	0.758	0.8406	0.8847	0.7925	0.7711	0.8454	0.8484
8.6219	0.5604	0.7005	0.8478	0.9523	0.683	0.7567	0.8393	0.8834	0.7912	0.7698	0.844	0.8471
8.4256	0.559	0.6991	0.8462	0.9512	0.6816	0.7554	0.838	0.882	0.7898	0.7686	0.8426	0.8457
8.2338	0.5577	0.6977	0.8446	0.9501	0.6803	0.7542	0.8367	0.8807	0.7885	0.7673	0.8411	0.8444
8.0464	0.5564	0.6963	0.843	0.9489	0.679	0.7529	0.8354	0.8793	0.7872	0.7661	0.8397	0.8431
7.8632	0.5551	0.6949	0.8414	0.9478	0.6777	0.7516	0.8341	0.878	0.7858	0.7648	0.8383	0.8417
7.6842	0.5538	0.6935	0.8398	0.9466	0.6764	0.7504	0.8328	0.8766	0.7845	0.7636	0.8368	0.8404
7.5093	0.5525	0.6921	0.8382	0.9455	0.6751	0.7491	0.8315	0.8752	0.7832	0.7623	0.8354	0.8391
7.3384	0.5512	0.6907	0.8366	0.9443	0.6738	0.7479	0.8302	0.8739	0.7819	0.7611	0.834	0.8377
7.1713	0.5499	0.6893	0.8351	0.9431	0.6725	0.7466	0.8289	0.8725	0.7806	0.7599	0.8326	0.8364
7.0081	0.5487	0.6879	0.8335	0.9418	0.6712	0.7454	0.8276	0.8711	0.7793	0.7586	0.8311	0.8351
6.8486	0.5474	0.6865	0.8319	0.9406	0.6699	0.7442	0.8263	0.8698	0.778	0.7574	0.8297	0.8338
6.6927	0.5462	0.6851	0.8303	0.9393	0.6686	0.7429	0.825	0.8684	0.7767	0.7562	0.8283	0.8324
6.5403	0.5449	0.6838	0.8287	0.938	0.6673	0.7417	0.8237	0.867	0.7754	0.755	0.8268	0.8311
6.3915	0.5437	0.6824	0.8271	0.9367	0.6661	0.7405	0.8224	0.8656	0.7741	0.7537	0.8254	0.8298
6.246	0.5424	0.681	0.8255	0.9354	0.6648	0.7392	0.8211	0.8643	0.7728	0.7525	0.824	0.8285
6.1038	0.5412	0.6797	0.8239	0.934	0.6636	0.738	0.8199	0.8629	0.7715	0.7513	0.8226	0.8272
5.9649	0.54	0.6783	0.8224	0.9327	0.6623	0.7368	0.8186	0.8615	0.7702	0.7501	0.8212	0.8258
5.8291	0.5388	0.677	0.8208	0.9313	0.6611	0.7356	0.8173	0.8601	0.7689	0.7489	0.8197	0.8245
5.6964	0.5376	0.6757	0.8192	0.9299	0.6598	0.7344	0.816	0.8587	0.7677	0.7477	0.8183	0.8232
5.5667	0.5364	0.6743	0.8176	0.9285	0.6586	0.7332	0.8147	0.8574	0.7664	0.7465	0.8169	0.8219
5.44	0.5352	0.673	0.8161	0.9271	0.6573	0.732	0.8135	0.856	0.7651	0.7453	0.8155	0.8206
5.3162	0.534	0.6717	0.8145	0.9256	0.6561	0.7308	0.8122	0.8546	0.7639	0.7441	0.8141	0.8193
5.1952	0.5329	0.6704	0.8129	0.9241	0.6549	0.7296	0.8109	0.8532	0.7626	0.7429	0.8127	0.818
5.0769	0.5317	0.669	0.8113	0.9226	0.6537	0.7284	0.8097	0.8518	0.7613	0.7418	0.8113	0.8167
4.9614	0.5305	0.6677	0.8098	0.9211	0.6525	0.7272	0.8084	0.8504	0.7601	0.7406	0.8099	0.8154
4.8484	0.5294	0.6664	0.8082	0.9196	0.6512	0.726	0.8071	0.8491	0.7588	0.7394	0.8085	0.8141
4.7381	0.5282	0.6651	0.8066	0.9181	0.65	0.7249	0.8059	0.8477	0.7576	0.7382	0.8071	0.8128
4.6302	0.5271	0.6638	0.8051	0.9165	0.6488	0.7237	0.8046	0.8463	0.7563	0.7371	0.8057	0.8115
4.5248	0.526	0.6626	0.8035	0.915	0.6476	0.7225	0.8034	0.8449	0.7551	0.7359	0.8043	0.8102
4.4218	0.5249	0.6613	0.802	0.9134	0.6465	0.7213	0.8021	0.8435	0.7538	0.7347	0.8029	0.8089
4.3212	0.5237	0.66	0.8004	0.9118	0.6453	0.7202	0.8009	0.8422	0.7526	0.7336	0.8015	0.8076
4.2228	0.5226	0.6587	0.7989	0.9102	0.6441	0.719	0.7996	0.8408	0.7514	0.7324	0.8001	0.8063
4.1267	0.5215	0.6575	0.7973	0.9085	0.6429	0.7179	0.7984	0.8394	0.7501	0.7313	0.7987	0.8051
4.0327	0.5204	0.6562	0.7958	0.9069	0.6417	0.7167	0.7971	0.838	0.7489	0.7301	0.7974	0.8038
3.9409	0.5193	0.655	0.7943	0.9052	0.6406	0.7156	0.7959	0.8366	0.7477	0.729	0.796	0.8025
3.8512	0.5183	0.6537	0.7927	0.9035	0.6394	0.7144	0.7947	0.8353	0.7465	0.7278	0.7946	0.8012
3.7636	0.5172	0.6525	0.7912	0.9019	0.6383	0.7133	0.7934	0.8339	0.7453	0.7267	0.7932	0.8
3.6779	0.5161	0.6512	0.7897	0.9001	0.6371	0.7121	0.7922	0.8325	0.7441	0.7256	0.7919	0.7987
3.5942	0.5151	0.65	0.7881	0.8984	0.636	0.711	0.791	0.8312	0.7428	0.7244	0.7905	0.7974
3.5124	0.514	0.6488	0.7866	0.8967	0.6348	0.7099	0.7897	0.8298	0.7416	0.7233	0.7891	0.7961
3.4324	0.513	0.6475	0.7851	0.895	0.6337	0.7087	0.7885	0.8284	0.7404	0.7222	0.7878	0.7949
3.3543	0.5119	0.6463	0.7836	0.8932	0.6326	0.7076	0.7873	0.8271	0.7392	0.721	0.7864	0.7936
3.2779	0.5109	0.6451	0.7821	0.8914	0.6314	0.7065	0.7861	0.8257	0.7381	0.7199	0.7851	0.7924
3.2033	0.5098	0.6439	0.7806	0.8896	0.6303	0.7054	0.7849	0.8243	0.7369	0.7188	0.7837	0.7911
3.1304	0.5088	0.6427	0.7791	0.8878	0.6292	0.7043	0.7837	0.823	0.7357	0.7177	0.7824	0.7899
3.0591	0.5078	0.6415	0.7776	0.886	0.6281	0.7032	0.7825	0.8216	0.7345	0.7166	0.781	0.7886
2.9895	0.5068	0.6403	0.7761	0.8842	0.627	0.7021	0.7813	0.8202	0.7333	0.7155	0.7797	0.7874
2.9215	0.5058	0.6391	0.7746	0.8824	0.6259	0.701	0.7801	0.8189	0.7321	0.7144	0.7783	0.7861
2.855	0.5048	0.6379	0.7731	0.8805	0.6248	0.6999	0.7789	0.8175	0.731	0.7133	0.777	0.7849
2.79	0.5038	0.6367	0.7716	0.8787	0.6237	0.6988	0.7777	0.8162	0.7298	0.7122	0.7757	0.7836
2.7265	0.5028	0.6356	0.7701	0.8768	0.6226	0.6977	0.7765	0.8148	0.7286	0.7111	0.7743	0.7824
2.6644	0.5018	0.6344	0.7686	0.875	0.6215	0.6966	0.7753	0.8135	0.7275	0.71	0.773	0.7812
2.6038	0.5008	0.6332	0.7672	0.8731	0.6204	0.6955	0.7741	0.8121	0.7263	0.7089	0.7717	0.78
2.5445	0.4999	0.6321	0.7657	0.8712	0.6193	0.6944	0.7729	0.8108	0.7252	0.7078	0.7704	0.7787
2.4866	0.4989	0.6309	0.7642	0.8693	0.6183	0.6934	0.7717	0.8095	0.724	0.7068	0.7691	0.7775
2.43	0.498	0.6297	0.7628	0.8674	0.6172	0.6923	0.7705	0.8081	0.7229	0.7057	0.7678	0.7763
2.3747	0.497	0.6286	0.7613	0.8655	0.6161	0.6912	0.7694	0.8068	0.7217	0.7046	0.7664	0.7751
2.3206	0.4961	0.6275	0.7599	0.8636	0.6151	0.6901	0.7682	0.8055	0.7206	0.7035	0.7651	0.7739
2.2678	0.4951	0.6263	0.7584	0.8616	0.614	0.6891	0.767	0.8041	0.7194	0.7025	0.7638	0.7726
2.2162	0.4942	0.6252	0.757	0.8597	0.613	0.688	0.7659	0.8028	0.7183	0.7014	0.7625	0.7714
2.1657	0.4933	0.6241	0.7556	0.8578	0.6119	0.687	0.7647	0.8015	0.7172	0.7004	0.7612	0.7702
2.1164	0.4923	0.6229	0.7541	0.8558	0.6109	0.6859	0.7635	0.8002	0.7161	0.6993	0.76	0.769
2.0682	0.4914	0.6218	0.7527	0.8539	0.6098	0.6849	0.7624	0.7988	0.7149	0.6983	0.7587	0.7678
2.0212	0.4905	0.6207	0.7513	0.8519	0.6088	0.6838	0.7612	0.7975	0.7138	0.6972	0.7574	0.7666
1.9752	0.4896	0.6196	0.7498	0.85	0.6078	0.6828	0.7601	0.7962	0.7127	0.6962	0.7561	0.7654
1.9302	0.4887	0.6185	0.7484	0.848	0.6067	0.6817	0.7589	0.7949	0.7116	0.6951	0.7548	0.7642
1.8863	0.4878	0.6174	0.747	0.846	0.6057	0.6807	0.7578	0.7936	0.7105	0.6941	0.7536	0.7631
1.8433	0.4869	0.6163	0.7456	0.8441	0.6047	0.6797	0.7567	0.7923	0.7094	0.693	0.7523	0.7619
1.8014	0.486	0.6152	0.7442	0.8421	0.6037	0.6787	0.7555	0.791	0.7083	0.692	0.751	0.7607
1.7604	0.4852	0.6141	0.7428	0.8401	0.6027	0.6776	0.7544	0.7897	0.7072	0.691	0.7498	0.7595
1.7203	0.4843	0.613	0.7414	0.8381	0.6017	0.6766	0.7533	0.7884	0.7061	0.69	0.7485	0.7583
1.6811	0.4834	0.612	0.74	0.8361	0.6007	0.6756	0.7521	0.7871	0.705	0.6889	0.7472	0.7572
1.6429	0.4826	0.6109	0.7387	0.8341	0.5997	0.6746	0.751	0.7858	0.7039	0.6879	0.746	0.756
1.6055	0.4817	0.6098	0.7373	0.8321	0.5987	0.6736	0.7499	0.7845	0.7028	0.6869	0.7447	0.7548
1.5689	0.4809	0.6088	0.7359	0.8301	0.5977	0.6726	0.7488	0.7833	0.7017	0.6859	0.7435	0.7537
1.5332	0.48	0.6077	0.7345	0.8282	0.5967	0.6716	0.7476	0.782	0.7007	0.6849	0.7423	0.7525
1.4983	0.4792	0.6066	0.7332	0.8262	0.5957	0.6706	0.7465	0.7807	0.6996	0.6839	0.741	0.7514
1.4642	0.4783	0.6056	0.7318	0.8242	0.5948	0.6696	0.7454	0.7794	0.6985	0.6829	0.7398	0.7502
1.4309	0.4775	0.6045	0.7305	0.8222	0.5938	0.6686	0.7443	0.7782	0.6975	0.6819	0.7386	0.7491
1.3983	0.4767	0.6035	0.7291	0.8202	0.5928	0.6676	0.7432	0.7769	0.6964	0.6809	0.7373	0.7479
1.3665	0.4759	0.6025	0.7278	0.8182	0.5919	0.6666	0.7421	0.7756	0.6953	0.6799	0.7361	0.7468
1.3354	0.475	0.6014	0.7264	0.8162	0.5909	0.6656	0.741	0.7744	0.6943	0.6789	0.7349	0.7456
1.305	0.4742	0.6004	0.7251	0.8142	0.59	0.6646	0.7399	0.7731	0.6932	0.6779	0.7337	0.7445
1.2753	0.4734	0.5994	0.7238	0.8122	0.589	0.6637	0.7388	0.7718	0.6922	0.6769	0.7325	0.7434
1.2462	0.4726	0.5984	0.7224	0.8102	0.5881	0.6627	0.7377	0.7706	0.6911	0.6759	0.7313	0.7422
1.2179	0.4718	0.5973	0.7211	0.8082	0.5871	0.6617	0.7367	0.7694	0.6901	0.6749	0.7301	0.7411
1.1901	0.471	0.5963	0.7198	0.8062	0.5862	0.6607	0.7356	0.7681	0.689	0.674	0.7289	0.74
1.1631	0.4703	0.5953	0.7185	0.8042	0.5852	0.6598	0.7345	0.7669	0.688	0.673	0.7277	0.7389
1.1366	0.4695	0.5943	0.7172	0.8022	0.5843	0.6588	0.7334	0.7656	0.687	0.672	0.7265	0.7378
1.1107	0.4687	0.5933	0.7159	0.8002	0.5834	0.6579	0.7324	0.7644	0.6859	0.671	0.7253	0.7366
1.0854	0.4679	0.5923	0.7146	0.7983	0.5825	0.6569	0.7313	0.7632	0.6849	0.6701	0.7241	0.7355
1.0607	0.4672	0.5913	0.7133	0.7963	0.5815	0.656	0.7302	0.7619	0.6839	0.6691	0.7229	0.7344
1.0366	0.4664	0.5903	0.712	0.7943	0.5806	0.655	0.7292	0.7607	0.6829	0.6682	0.7217	0.7333
1.013	0.4656	0.5894	0.7107	0.7923	0.5797	0.6541	0.7281	0.7595	0.6819	0.6672	0.7206	0.7322
0.9899	0.4649	0.5884	0.7094	0.7904	0.5788	0.6531	0.7271	0.7583	0.6809	0.6663	0.7194	0.7311
0.9674	0.4641	0.5874	0.7081	0.7884	0.5779	0.6522	0.726	0.7571	0.6798	0.6653	0.7182	0.73
0.9454	0.4634	0.5864	0.7069	0.7864	0.577	0.6513	0.7249	0.7559	0.6788	0.6644	0.7171	0.7289
0.9238	0.4627	0.5855	0.7056	0.7845	0.5761	0.6503	0.7239	0.7547	0.6778	0.6634	0.7159	0.7278
0.9028	0.4619	0.5845	0.7043	0.7825	0.5752	0.6494	0.7229	0.7535	0.6768	0.6625	0.7147	0.7268
0.8823	0.4612	0.5836	0.7031	0.7806	0.5743	0.6485	0.7218	0.7523	0.6758	0.6615	0.7136	0.7257
0.8622	0.4605	0.5826	0.7018	0.7786	0.5734	0.6476	0.7208	0.7511	0.6749	0.6606	0.7124	0.7246
0.8426	0.4598	0.5816	0.7006	0.7767	0.5726	0.6466	0.7198	0.7499	0.6739	0.6597	0.7113	0.7235
0.8234	0.459	0.5807	0.6994	0.7747	0.5717	0.6457	0.7187	0.7487	0.6729	0.6588	0.7102	0.7225
0.8046	0.4583	0.5798	0.6981	0.7728	0.5708	0.6448	0.7177	0.7475	0.6719	0.6578	0.709	0.7214
0.7863	0.4576	0.5788	0.6969	0.7709	0.5699	0.6439	0.7167	0.7463	0.6709	0.6569	0.7079	0.7203
0.7684	0.4569	0.5779	0.6957	0.7689	0.5691	0.643	0.7156	0.7451	0.6699	0.656	0.7068	0.7193
0.7509	0.4562	0.577	0.6944	0.767	0.5682	0.6421	0.7146	0.744	0.669	0.6551	0.7056	0.7182
0.7338	0.4555	0.576	0.6932	0.7651	0.5674	0.6412	0.7136	0.7428	0.668	0.6542	0.7045	0.7171
0.7171	0.4548	0.5751	0.692	0.7632	0.5665	0.6403	0.7126	0.7416	0.667	0.6532	0.7034	0.7161
0.7008	0.4542	0.5742	0.6908	0.7613	0.5656	0.6394	0.7116	0.7405	0.6661	0.6523	0.7023	0.715
0.6849	0.4535	0.5733	0.6896	0.7594	0.5648	0.6385	0.7106	0.7393	0.6651	0.6514	0.7012	0.714
0.6693	0.4528	0.5724	0.6884	0.7575	0.564	0.6376	0.7096	0.7381	0.6641	0.6505	0.7	0.7129
0.654	0.4521	0.5715	0.6872	0.7556	0.5631	0.6367	0.7086	0.737	0.6632	0.6496	0.6989	0.7119
0.6391	0.4515	0.5706	0.686	0.7537	0.5623	0.6359	0.7076	0.7358	0.6622	0.6487	0.6978	0.7109
0.6246	0.4508	0.5697	0.6848	0.7519	0.5614	0.635	0.7066	0.7347	0.6613	0.6478	0.6967	0.7098
0.6104	0.4501	0.5688	0.6836	0.75	0.5606	0.6341	0.7056	0.7335	0.6604	0.647	0.6956	0.7088
0.5965	0.4495	0.5679	0.6825	0.7482	0.5598	0.6332	0.7046	0.7324	0.6594	0.6461	0.6946	0.7078
0.5829	0.4488	0.567	0.6813	0.7463	0.559	0.6324	0.7036	0.7313	0.6585	0.6452	0.6935	0.7067
0.5696	0.4482	0.5661	0.6801	0.7445	0.5581	0.6315	0.7026	0.7301	0.6575	0.6443	0.6924	0.7057
0.5567	0.4475	0.5652	0.679	0.7426	0.5573	0.6306	0.7017	0.729	0.6566	0.6434	0.6913	0.7047
0.544	0.4469	0.5643	0.6778	0.7408	0.5565	0.6298	0.7007	0.7279	0.6557	0.6426	0.6902	0.7037
0.5316	0.4463	0.5635	0.6766	0.739	0.5557	0.6289	0.6997	0.7268	0.6547	0.6417	0.6892	0.7027
0.5195	0.4456	0.5626	0.6755	0.7371	0.5549	0.6281	0.6987	0.7257	0.6538	0.6408	0.6881	0.7017
0.5077	0.445	0.5617	0.6743	0.7353	0.5541	0.6272	0.6978	0.7245	0.6529	0.6399	0.687	0.7007
0.4961	0.4444	0.5609	0.6732	0.7335	0.5533	0.6264	0.6968	0.7234	0.652	0.6391	0.686	0.6997
0.4848	0.4437	0.56	0.6721	0.7317	0.5525	0.6255	0.6959	0.7223	0.6511	0.6382	0.6849	0.6987
0.4738	0.4431	0.5592	0.6709	0.7299	0.5517	0.6247	0.6949	0.7212	0.6502	0.6374	0.6838	0.6977
0.463	0.4425	0.5583	0.6698	0.7281	0.5509	0.6238	0.6939	0.7201	0.6493	0.6365	0.6828	0.6967
0.4525	0.4419	0.5575	0.6687	0.7264	0.5501	0.623	0.693	0.719	0.6484	0.6356	0.6817	0.6957
0.4422	0.4413	0.5566	0.6676	0.7246	0.5493	0.6222	0.692	0.7179	0.6475	0.6348	0.6807	0.6947
0.4321	0.4407	0.5558	0.6664	0.7228	0.5486	0.6213	0.6911	0.7168	0.6466	0.6339	0.6797	0.6937
0.4223	0.4401	0.5549	0.6653	0.7211	0.5478	0.6205	0.6902	0.7157	0.6457	0.6331	0.6786	0.6927
0.4127	0.4395	0.5541	0.6642	0.7193	0.547	0.6197	0.6892	0.7147	0.6448	0.6323	0.6776	0.6917
0.4033	0.4389	0.5533	0.6631	0.7176	0.5462	0.6188	0.6883	0.7136	0.6439	0.6314	0.6766	0.6908
0.3941	0.4383	0.5525	0.662	0.7159	0.5455	0.618	0.6873	0.7125	0.643	0.6306	0.6755	0.6898
0.3851	0.4377	0.5516	0.6609	0.7141	0.5447	0.6172	0.6864	0.7114	0.6421	0.6297	0.6745	0.6888
0.3764	0.4372	0.5508	0.6599	0.7124	0.5439	0.6164	0.6855	0.7104	0.6412	0.6289	0.6735	0.6878
0.3678	0.4366	0.55	0.6588	0.7107	0.5432	0.6156	0.6846	0.7093	0.6404	0.6281	0.6725	0.6869
0.3594	0.436	0.5492	0.6577	0.709	0.5424	0.6148	0.6836	0.7082	0.6395	0.6273	0.6714	0.6859
0.3512	0.4354	0.5484	0.6566	0.7073	0.5417	0.614	0.6827	0.7072	0.6386	0.6264	0.6704	0.685
0.3432	0.4349	0.5476	0.6555	0.7056	0.5409	0.6132	0.6818	0.7061	0.6377	0.6256	0.6694	0.684
0.3354	0.4343	0.5468	0.6545	0.704	0.5402	0.6124	0.6809	0.7051	0.6369	0.6248	0.6684	0.683
0.3278	0.4338	0.546	0.6534	0.7023	0.5395	0.6116	0.68	0.704	0.636	0.624	0.6674	0.6821
0.3203	0.4332	0.5452	0.6524	0.7006	0.5387	0.6108	0.6791	0.703	0.6351	0.6232	0.6664	0.6811
0.313	0.4327	0.5444	0.6513	0.699	0.538	0.61	0.6782	0.7019	0.6343	0.6224	0.6654	0.6802
0.3059	0.4321	0.5436	0.6502	0.6973	0.5373	0.6092	0.6773	0.7009	0.6334	0.6215	0.6644	0.6793
0.299	0.4316	0.5428	0.6492	0.6957	0.5365	0.6084	0.6763	0.6999	0.6326	0.6207	0.6635	0.6783
0.2921	0.431	0.542	0.6482	0.694	0.5358	0.6076	0.6755	0.6988	0.6317	0.6199	0.6625	0.6774
0.2855	0.4305	0.5413	0.6471	0.6924	0.5351	0.6068	0.6746	0.6978	0.6309	0.6191	0.6615	0.6765
0.279	0.4299	0.5405	0.6461	0.6908	0.5344	0.606	0.6737	0.6968	0.63	0.6183	0.6605	0.6755
0.2726	0.4294	0.5397	0.6451	0.6892	0.5336	0.6053	0.6728	0.6958	0.6292	0.6175	0.6595	0.6746
0.2664	0.4289	0.5389	0.644	0.6876	0.5329	0.6045	0.6719	0.6947	0.6284	0.6168	0.6586	0.6737
0.2604	0.4284	0.5382	0.643	0.686	0.5322	0.6037	0.671	0.6937	0.6275	0.616	0.6576	0.6727
0.2544	0.4278	0.5374	0.642	0.6844	0.5315	0.603	0.6701	0.6927	0.6267	0.6152	0.6566	0.6718
0.2487	0.4273	0.5366	0.641	0.6828	0.5308	0.6022	0.6692	0.6917	0.6259	0.6144	0.6557	0.6709
0.243	0.4268	0.5359	0.64	0.6813	0.5301	0.6014	0.6684	0.6907	0.625	0.6136	0.6547	0.67
0.2375	0.4263	0.5351	0.639	0.6797	0.5294	0.6007	0.6675	0.6897	0.6242	0.6128	0.6538	0.6691
0.2321	0.4258	0.5344	0.638	0.6782	0.5287	0.5999	0.6666	0.6887	0.6234	0.6121	0.6528	0.6682
0.2268	0.4253	0.5336	0.637	0.6766	0.528	0.5992	0.6658	0.6877	0.6226	0.6113	0.6519	0.6673
0.2216	0.4248	0.5329	0.636	0.6751	0.5273	0.5984	0.6649	0.6867	0.6218	0.6105	0.6509	0.6664
0.2166	0.4243	0.5322	0.635	0.6735	0.5266	0.5977	0.664	0.6857	0.621	0.6097	0.65	0.6655
0.2116	0.4238	0.5314	0.634	0.672	0.526	0.5969	0.6632	0.6847	0.6201	0.609	0.649	0.6646
0.2068	0.4233	0.5307	0.633	0.6705	0.5253	0.5962	0.6623	0.6838	0.6193	0.6082	0.6481	0.6637
0.2021	0.4228	0.53	0.6321	0.669	0.5246	0.5954	0.6615	0.6828	0.6185	0.6074	0.6472	0.6628
0.1975	0.4223	0.5292	0.6311	0.6675	0.5239	0.5947	0.6606	0.6818	0.6177	0.6067	0.6462	0.6619
0.193	0.4218	0.5285	0.6301	0.666	0.5232	0.5939	0.6598	0.6808	0.6169	0.6059	0.6453	0.661
0.1886	0.4213	0.5278	0.6291	0.6645	0.5226	0.5932	0.6589	0.6799	0.6161	0.6052	0.6444	0.6601
0.1843	0.4209	0.5271	0.6282	0.663	0.5219	0.5925	0.6581	0.6789	0.6153	0.6044	0.6435	0.6593
0.1801	0.4204	0.5264	0.6272	0.6616	0.5212	0.5917	0.6572	0.6779	0.6146	0.6037	0.6426	0.6584
0.176	0.4199	0.5256	0.6263	0.6601	0.5206	0.591	0.6564	0.677	0.6138	0.6029	0.6416	0.6575
0.172	0.4194	0.5249	0.6253	0.6586	0.5199	0.5903	0.6556	0.676	0.613	0.6022	0.6407	0.6566
0.1681	0.419	0.5242	0.6244	0.6572	0.5193	0.5896	0.6547	0.6751	0.6122	0.6014	0.6398	0.6558
0.1643	0.4185	0.5235	0.6234	0.6558	0.5186	0.5889	0.6539	0.6741	0.6114	0.6007	0.6389	0.6549
0.1605	0.4181	0.5228	0.6225	0.6543	0.518	0.5881	0.6531	0.6732	0.6106	0.5999	0.638	0.654
0.1569	0.4176	0.5221	0.6216	0.6529	0.5173	0.5874	0.6523	0.6722	0.6099	0.5992	0.6371	0.6532
0.1533	0.4171	0.5214	0.6206	0.6515	0.5167	0.5867	0.6514	0.6713	0.6091	0.5985	0.6362	0.6523
0.1498	0.4167	0.5207	0.6197	0.6501	0.516	0.586	0.6506	0.6704	0.6083	0.5977	0.6353	0.6515
0.1464	0.4162	0.5201	0.6188	0.6487	0.5154	0.5853	0.6498	0.6694	0.6076	0.597	0.6344	0.6506
0.1431	0.4158	0.5194	0.6179	0.6473	0.5148	0.5846	0.649	0.6685	0.6068	0.5963	0.6336	0.6498
0.1398	0.4153	0.5187	0.6169	0.6459	0.5141	0.5839	0.6482	0.6676	0.606	0.5956	0.6327	0.6489
0.1366	0.4149	0.518	0.616	0.6445	0.5135	0.5832	0.6474	0.6666	0.6053	0.5948	0.6318	0.6481
0.1335	0.4145	0.5173	0.6151	0.6431	0.5129	0.5825	0.6466	0.6657	0.6045	0.5941	0.6309	0.6472
0.1305	0.414	0.5167	0.6142	0.6418	0.5122	0.5818	0.6457	0.6648	0.6038	0.5934	0.63	0.6464
0.1275	0.4136	0.516	0.6133	0.6404	0.5116	0.5811	0.6449	0.6639	0.603	0.5927	0.6292	0.6456
0.1246	0.4132	0.5153	0.6124	0.6391	0.511	0.5804	0.6441	0.663	0.6023	0.592	0.6283	0.6447
0.1218	0.4127	0.5147	0.6115	0.6377	0.5104	0.5797	0.6433	0.6621	0.6015	0.5913	0.6274	0.6439
0.119	0.4123	0.514	0.6106	0.6364	0.5098	0.579	0.6426	0.6612	0.6008	0.5906	0.6266	0.6431
0.1163	0.4119	0.5133	0.6098	0.6351	0.5091	0.5784	0.6418	0.6603	0.6	0.5899	0.6257	0.6422
0.1137	0.4115	0.5127	0.6089	0.6337	0.5085	0.5777	0.641	0.6594	0.5993	0.5892	0.6249	0.6414
0.1111	0.4111	0.512	0.608	0.6324	0.5079	0.577	0.6402	0.6585	0.5986	0.5885	0.624	0.6406
0.1085	0.4106	0.5114	0.6071	0.6311	0.5073	0.5763	0.6394	0.6576	0.5978	0.5878	0.6232	0.6398
0.1061	0.4102	0.5107	0.6062	0.6298	0.5067	0.5756	0.6386	0.6567	0.5971	0.5871	0.6223	0.639
0.1037	0.4098	0.5101	0.6054	0.6285	0.5061	0.575	0.6378	0.6558	0.5964	0.5864	0.6215	0.6382
0.1013	0.4094	0.5094	0.6045	0.6272	0.5055	0.5743	0.6371	0.6549	0.5956	0.5857	0.6206	0.6373
0.099	0.409	0.5088	0.6037	0.6259	0.5049	0.5736	0.6363	0.654	0.5949	0.585	0.6198	0.6365
0.0967	0.4086	0.5082	0.6028	0.6247	0.5043	0.573	0.6355	0.6531	0.5942	0.5843	0.619	0.6357
0.0945	0.4082	0.5075	0.6019	0.6234	0.5037	0.5723	0.6348	0.6523	0.5935	0.5836	0.6181	0.6349
0.0924	0.4078	0.5069	0.6011	0.6221	0.5032	0.5717	0.634	0.6514	0.5927	0.5829	0.6173	0.6341
0.0903	0.4074	0.5063	0.6002	0.6209	0.5026	0.571	0.6332	0.6505	0.592	0.5822	0.6165	0.6333
0.0882	0.407	0.5056	0.5994	0.6197	0.502	0.5703	0.6325	0.6497	0.5913	0.5816	0.6156	0.6325
0.0862	0.4066	0.505	0.5986	0.6184	0.5014	0.5697	0.6317	0.6488	0.5906	0.5809	0.6148	0.6317
0.0843	0.4062	0.5044	0.5977	0.6172	0.5008	0.569	0.6309	0.6479	0.5899	0.5802	0.614	0.6309
0.0823	0.4059	0.5038	0.5969	0.616	0.5003	0.5684	0.6302	0.6471	0.5892	0.5795	0.6132	0.6302
0.0805	0.4055	0.5032	0.5961	0.6147	0.4997	0.5677	0.6294	0.6462	0.5885	0.5789	0.6124	0.6294
0.0786	0.4051	0.5025	0.5952	0.6135	0.4991	0.5671	0.6287	0.6454	0.5878	0.5782	0.6116	0.6286
0.0768	0.4047	0.5019	0.5944	0.6123	0.4985	0.5665	0.6279	0.6445	0.5871	0.5775	0.6108	0.6278
0.0751	0.4043	0.5013	0.5936	0.6111	0.498	0.5658	0.6272	0.6437	0.5864	0.5769	0.6099	0.627
0.0734	0.404	0.5007	0.5928	0.6099	0.4974	0.5652	0.6264	0.6428	0.5857	0.5762	0.6091	0.6263
0.0717	0.4036	0.5001	0.592	0.6087	0.4969	0.5645	0.6257	0.642	0.585	0.5756	0.6083	0.6255
0.0701	0.4032	0.4995	0.5911	0.6076	0.4963	0.5639	0.625	0.6411	0.5843	0.5749	0.6075	0.6247
0.0685	0.4029	0.4989	0.5903	0.6064	0.4957	0.5633	0.6242	0.6403	0.5836	0.5742	0.6068	0.6239
0.0669	0.4025	0.4983	0.5895	0.6052	0.4952	0.5626	0.6235	0.6395	0.583	0.5736	0.606	0.6232
0.0654	0.4021	0.4977	0.5887	0.6041	0.4946	0.562	0.6228	0.6386	0.5823	0.5729	0.6052	0.6224
0.0639	0.4018	0.4971	0.5879	0.6029	0.4941	0.5614	0.622	0.6378	0.5816	0.5723	0.6044	0.6216
0.0625	0.4014	0.4965	0.5871	0.6018	0.4935	0.5608	0.6213	0.637	0.5809	0.5716	0.6036	0.6209
0.061	0.4011	0.496	0.5864	0.6006	0.493	0.5602	0.6206	0.6362	0.5802	0.571	0.6028	0.6201
0.0596	0.4007	0.4954	0.5856	0.5995	0.4925	0.5595	0.6199	0.6354	0.5796	0.5704	0.602	0.6194
0.0583	0.4004	0.4948	0.5848	0.5984	0.4919	0.5589	0.6191	0.6345	0.5789	0.5697	0.6013	0.6186
0.057	0.4	0.4942	0.584	0.5973	0.4914	0.5583	0.6184	0.6337	0.5782	0.5691	0.6005	0.6179
0.0557	0.3997	0.4936	0.5832	0.5961	0.4908	0.5577	0.6177	0.6329	0.5776	0.5684	0.5997	0.6171
0.0544	0.3993	0.4931	0.5824	0.595	0.4903	0.5571	0.617	0.6321	0.5769	0.5678	0.599	0.6164
0.0532	0.399	0.4925	0.5817	0.5939	0.4898	0.5565	0.6163	0.6313	0.5762	0.5672	0.5982	0.6156
0.052	0.3986	0.4919	0.5809	0.5928	0.4893	0.5559	0.6156	0.6305	0.5756	0.5666	0.5974	0.6149
0.0508	0.3983	0.4914	0.5801	0.5917	0.4887	0.5553	0.6149	0.6297	0.5749	0.5659	0.5967	0.6142
0.0496	0.398	0.4908	0.5794	0.5907	0.4882	0.5547	0.6142	0.6289	0.5743	0.5653	0.5959	0.6134
0.0485	0.3976	0.4902	0.5786	0.5896	0.4877	0.5541	0.6135	0.6281	0.5736	0.5647	0.5952	0.6127
0.0474	0.3973	0.4897	0.5779	0.5885	0.4872	0.5535	0.6128	0.6273	0.573	0.5641	0.5944	0.612
0.0463	0.397	0.4891	0.5771	0.5874	0.4866	0.5529	0.6121	0.6265	0.5723	0.5634	0.5937	0.6112
0.0452	0.3966	0.4886	0.5764	0.5864	0.4861	0.5523	0.6114	0.6257	0.5717	0.5628	0.5929	0.6105
0.0442	0.3963	0.488	0.5756	0.5853	0.4856	0.5517	0.6107	0.625	0.571	0.5622	0.5922	0.6098
0.0432	0.396	0.4875	0.5749	0.5843	0.4851	0.5511	0.61	0.6242	0.5704	0.5616	0.5914	0.6091
0.0422	0.3957	0.4869	0.5741	0.5832	0.4846	0.5505	0.6093	0.6234	0.5698	0.561	0.5907	0.6083
0.0413	0.3953	0.4864	0.5734	0.5822	0.4841	0.5499	0.6086	0.6226	0.5691	0.5604	0.59	0.6076
0.0403	0.395	0.4858	0.5727	0.5812	0.4836	0.5493	0.6079	0.6219	0.5685	0.5598	0.5892	0.6069
0.0394	0.3947	0.4853	0.5719	0.5802	0.4831	0.5488	0.6072	0.6211	0.5679	0.5592	0.5885	0.6062
0.0385	0.3944	0.4848	0.5712	0.5791	0.4826	0.5482	0.6066	0.6203	0.5672	0.5585	0.5878	0.6055
0.0376	0.3941	0.4842	0.5705	0.5781	0.4821	0.5476	0.6059	0.6196	0.5666	0.5579	0.587	0.6048
0.0368	0.3938	0.4837	0.5698	0.5771	0.4816	0.547	0.6052	0.6188	0.566	0.5573	0.5863	0.6041
0.0359	0.3935	0.4832	0.569	0.5761	0.4811	0.5465	0.6045	0.618	0.5653	0.5567	0.5856	0.6034
0.0351	0.3932	0.4826	0.5683	0.5751	0.4806	0.5459	0.6039	0.6173	0.5647	0.5562	0.5849	0.6027
0.0343	0.3929	0.4821	0.5676	0.5741	0.4801	0.5453	0.6032	0.6165	0.5641	0.5556	0.5842	0.602
0.0335	0.3925	0.4816	0.5669	0.5731	0.4796	0.5448	0.6025	0.6158	0.5635	0.555	0.5834	0.6013
0.0328	0.3922	0.4811	0.5662	0.5722	0.4791	0.5442	0.6019	0.615	0.5629	0.5544	0.5827	0.6006
0.032	0.3919	0.4805	0.5655	0.5712	0.4787	0.5436	0.6012	0.6143	0.5623	0.5538	0.582	0.5999
0.0313	0.3917	0.48	0.5648	0.5702	0.4782	0.5431	0.6005	0.6135	0.5616	0.5532	0.5813	0.5992

## Sheet: Figure 4
FIGURE 4 | Plant-available water capacity in the 0–50 cm depth under soil compaction levels of a Rhodic Eutrudox. Means followed by the same letters do not differ by Tukey’s test at the 5% level; Bars indicate the standard error of the mean. MTC: minimum tillage with chiseling; NT: no-till system; NTC4: no-tillage with four passes of a tractor; NTC8: no-tillage with eight passes of a harvester.
	Soil water content adjusted (m3 m-3)
Depth	0-10 cm				10-20 cm				20-30 cm
Treatment / Matric Potential (|cm|)	MTC	NT	NTC4	NTC8	MTC	NT	NTC4	NTC8	MTC	NT	NTC4	NTC8
100 (Field capacity)	0.3726	0.4344	0.4714	0.493	0.419	0.4363	0.4637	0.4788	0.4552	0.4527	0.4815	0.4825
15000 (wilting point)	0.2434	0.2925	0.3209	0.3338	0.2877	0.3124	0.337	0.3447	0.3246	0.3261	0.3389	0.3483
Parameter	MTC	NT	NTC4	NTC8	MTC	NT	NTC4	NTC8	MTC	NT	NTC4	NTC8
Available water	0.1292	0.1419	0.1505	0.1592	0.1313	0.1239	0.1267	0.1341	0.1306	0.1266	0.1426	0.1342
Plant-available water capacity	12.92	14.19	15.05	15.92	13.13	12.39	12.67	13.41	13.06	12.66	14.26	13.42
PAWC 0-50 cm	65.1833	65.4	69.9667	71.25

## Sheet: Figure 5
FIGURE 5 | Dry mass of the shoot of the plant (A) and grain yield (B) of maize grown in different compaction levels of a Rhodic Eutrudox. MTC: minimum tillage with chiseling; NT: no-till system; NTC4: no tillage with four passes of a tractor; NTC8: no-tillage with eight passes of a harvester. Means followed by the same letters do not differ by Tukey’s test at the 5% level. Bars indicate the stand…
			Figure 5a	Figure 5b
Field Plot	Treatment	Block	Shoot (kg ha-1)	Grain yield (kg ha-1)
P36	MTC	I	6709.44	4340.38
P22	MTC	II	5971.11	5368.35
P31	MTC	III	7113.89	5283.08
P37	NT	I	7666.67	5292.61
P10	NT	II	6396.22	5826.92
P43	NT	III	6793.33	6118.27
P48	NTC4	I	7676.67	4486.73
P15	NTC4	II	9202.78	6053.87
P30	NTC4	III	8006.67	5430.96
P25	NTC8	I	5462.78	3836.24
P3	NTC8	II	7075.56	4921.54
P42	NTC8	III	7253.33	5183.59

## Sheet: Figure 6
FIGURE 6 | Maize root length density (A) and dry mass (log scale) (B) in 1D in the soil profile because of compaction levels in a Rhodic Eutrudox. MTC: minimum tillage with chiseling; NT: no-till system; NTC4: no-tillage with four passes of a tractor; NTC8: no-tillage with eight passes of a harvester; ns: not significant. Means followed by the same letters do not differ by Tukey’s test at the 5% …
				Figure 6a	Figure 6b
Field Plot number	Treatment	Block	Soil layer (cm)	Root length density (cm cm-3)	Root dry mass (g m-2/10cm depth)
P36	MTC	I	0_10	0.45997	57.5302
P36	MTC	I	10_20	0.602994	16.0556
P36	MTC	I	20_30	0.479989	9.49841
P36	MTC	I	30_40	0.121731	2.35635
P36	MTC	I	40_50	0.206279	2.94921
P22	MTC	II	0_10	1.61325	129.487
P22	MTC	II	10_20	0.615163	26.5794
P22	MTC	II	20_30	0.597161	18.0381
P22	MTC	II	30_40	0.328539	8.77619
P22	MTC	II	40_50	0.460117	8.6746
P31	MTC	III	0_10	1.1728	68.6381
P31	MTC	III	10_20	0.511688	13.8206
P31	MTC	III	20_30	0.442328	9.66032
P31	MTC	III	30_40	0.348194	6.13016
P31	MTC	III	40_50	0.247572	6.10635
P37	NT	I	0_10	2.09492	234.89
P37	NT	I	10_20	0.952373	19.8048
P37	NT	I	20_30	0.423327	4.76508
P37	NT	I	30_40	0.292344	4.37937
P37	NT	I	40_50	0.458164	6.64921
P10	NT	II	0_10	1.63702	122.635
P10	NT	II	10_20	0.808589	15.8349
P10	NT	II	20_30	0.544532	10.6476
P10	NT	II	30_40	0.372101	3.9
P10	NT	II	40_50	0.361674	3.94603
P43	NT	III	0_10	1.27967	105.41
P43	NT	III	10_20	0.542031	13.4905
P43	NT	III	20_30	0.436138	9.3746
P43	NT	III	30_40	0.321099	7.60794
P43	NT	III	40_50	0.344156	5.78889
P48	NTC4	I	0_10	1.52252	73.8492
P48	NTC4	I	10_20	0.247673	7.35714
P48	NTC4	I	20_30	0.173694	2.96032
P48	NTC4	I	30_40	0.293797	3.46032
P48	NTC4	I	40_50	0.154987	2.34603
P15	NTC4	II	0_10	0.562627	74.754
P15	NTC4	II	10_20	0.370613	7.71587
P15	NTC4	II	20_30	0.526244	8.58413
P15	NTC4	II	30_40	0.354193	4.6254
P15	NTC4	II	40_50	0.624952	9.4381
P30	NTC4	III	0_10	2.37841	307.81
P30	NTC4	III	10_20	0.54203	11.8778
P30	NTC4	III	20_30	0.498159	4.4381
P30	NTC4	III	30_40	0.412287	4.22222
P30	NTC4	III	40_50	0.5489	4.29206
P25	NTC8	I	0_10	1.91431	101.348
P25	NTC8	I	10_20	0.942745	14.0444
P25	NTC8	I	20_30	1.06863	13.3635
P25	NTC8	I	30_40	0.402712	6.87937
P25	NTC8	I	40_50	0.522785	8.3
P3	NTC8	II	0_10	2.60944	179.844
P3	NTC8	II	10_20	0.407546	8.31429
P3	NTC8	II	20_30	0.509385	8.28095
P3	NTC8	II	30_40	0.529918	5.17143
P3	NTC8	II	40_50	0.393895	4.6619
P42	NTC8	III	0_10	2.91063	245.35
P42	NTC8	III	10_20	0.755113	22.6794
P42	NTC8	III	20_30	0.402854	6.9746
P42	NTC8	III	30_40	0.236547	4.70476
P42	NTC8	III	40_50	0.39642	5.56825

## Sheet: Figure 7
FIGURE 7 | Root length density of maize (Zea mays) measured at field condition (A–D) and modeled (E–H) in 2D in soil profile under four soil compactions levels: (A, E) reduced tillage system (MTC), (B, F) no-tillage system (NT), (C, Results no-tillage system with four tractor passes (NTC4), or (D, H) no-tillage system with eight harvester passes (NTC8), and (I) relationship of simulated and measu…
											Figure 7(a,b,c,d)	Figure 7(e,f,g,h)
Field Plot number	Treatment	Block	Soil Layer (cm)	Sample position	Root length density measured (cm cm-3)		Treatment	Sample position	Distance from the row (cm)	Depth (cm)	Root length density measured (cm cm-3)	Root length density simulated (cm cm-3)
P36	MTC	I	0_10	AI	0.432319		MTC	AI	-30	-5	0.987071	0.0565254
P36	MTC	I	0_10	AII	0.742323		MTC	AII	0	-5	1.70393	3.30259
P36	MTC	I	0_10	AIII	0.205267		MTC	AIII	30	-5	0.55502	0.0639904
P36	MTC	I	10_20	BI	0.536576		MTC	BI	-30	-15	0.382673	0.336765
P36	MTC	I	10_20	BII	0.984722		MTC	BII	0	-15	0.891967	1.7025
P36	MTC	I	10_20	BIII	0.287683		MTC	BIII	30	-15	0.455205	0.26803
P36	MTC	I	20_30	CI	0.230531		MTC	CI	-30	-25	0.310085	0.300568
P36	MTC	I	20_30	CII	0.991723		MTC	CII	0	-25	0.742739	0.911221
P36	MTC	I	20_30	CIII	0.217713		MTC	CIII	30	-25	0.466654	0.159047
P36	MTC	I	30_40	DI	0.228175		MTC	DI	-30	-35	0.222759	0.207943
P36	MTC	I	30_40	DII	0.104606		MTC	DII	0	-35	0.399784	0.648322
P36	MTC	I	30_40	DIII	0.0324119		MTC	DIII	30	-35	0.175921	0.0459416
P36	MTC	I	40_50	EI	0.162672		MTC	EI	-30	-45	0.264014	0.110992
P36	MTC	I	40_50	EII	0.323103		MTC	EII	0	-45	0.414248	0.47564
P36	MTC	I	40_50	EIII	0.133061		MTC	EIII	30	-45	0.235705	0.0111919
P22	MTC	II	0_10	AI	1.37853		NT	AI	-30	-5	0.860334	0.0357827
P22	MTC	II	0_10	AII	2.76118		NT	AII	0	-5	2.66477	3.29826
P22	MTC	II	0_10	AIII	0.700044		NT	AIII	30	-5	1.4865	0.0241573
P22	MTC	II	10_20	BI	0.162968		NT	BI	-30	-15	0.442244	0.174651
P22	MTC	II	10_20	BII	1.00988		NT	BII	0	-15	1.33573	1.53754
P22	MTC	II	10_20	BIII	0.672638		NT	BIII	30	-15	0.525023	0.169178
P22	MTC	II	20_30	CI	0.362593		NT	CI	-30	-25	0.45429	0.14488
P22	MTC	II	20_30	CII	0.547609		NT	CII	0	-25	0.610107	0.820309
P22	MTC	II	20_30	CIII	0.88128		NT	CIII	30	-25	0.339601	0.133185
P22	MTC	II	30_40	DI	0.316635		NT	DI	-30	-35	0.183948	0.120703
P22	MTC	II	30_40	DII	0.423203		NT	DII	0	-35	0.404588	0.611785
P22	MTC	II	30_40	DIII	0.245779		NT	DIII	30	-35	0.397008	0.086891
P22	MTC	II	40_50	EI	0.574943		NT	EI	-30	-45	0.227705	0.0640808
P22	MTC	II	40_50	EII	0.341463		NT	EII	0	-45	0.628282	0.394405
P22	MTC	II	40_50	EIII	0.463944		NT	EIII	30	-45	0.308006	0.0382341
P31	MTC	III	0_10	AI	1.15036		NTC4	AI	-30	-5	0.252286	0.0406727
P31	MTC	III	0_10	AII	1.60828		NTC4	AII	0	-5	3.72066	2.85917
P31	MTC	III	0_10	AIII	0.759749		NTC4	AIII	30	-5	0.49061	0.0212023
P31	MTC	III	10_20	BI	0.448474		NTC4	BI	-30	-15	0.16636	0.112505
P31	MTC	III	10_20	BII	0.681296		NTC4	BII	0	-15	0.80769	1.28544
P31	MTC	III	10_20	BIII	0.405295		NTC4	BIII	30	-15	0.186265	0.107685
P31	MTC	III	20_30	CI	0.337131		NTC4	CI	-30	-25	0.149542	0.115731
P31	MTC	III	20_30	CII	0.688884		NTC4	CII	0	-25	0.896586	0.639193
P31	MTC	III	20_30	CIII	0.300968		NTC4	CIII	30	-25	0.15197	0.0944469
P31	MTC	III	30_40	DI	0.123467		NTC4	DI	-30	-35	0.350644	0.105699
P31	MTC	III	30_40	DII	0.671543		NTC4	DII	0	-35	0.563225	0.492192
P31	MTC	III	30_40	DIII	0.249573		NTC4	DIII	30	-35	0.146408	0.0443636
P31	MTC	III	40_50	EI	0.0544269		NTC4	EI	-30	-45	0.0916898	0.0682284
P31	MTC	III	40_50	EII	0.578179		NTC4	EII	0	-45	1.06384	0.324009
P31	MTC	III	40_50	EIII	0.110109		NTC4	EIII	30	-45	0.17331	0.015244
P37	NT	I	0_10	AI	1.1071		NTC8	AI	-30	-5	0.933428	0.0361537
P48	NT	I	0_10	AI	0.212459		NTC8	AII	0	-5	6.10221	3.30888
P37	NT	I	0_10	AII	3.97416		NTC8	AIII	30	-5	0.398729	0.0632511
P48	NT	I	0_10	AII	3.87661		NTC8	BI	-30	-15	0.669354	0.157832
P37	NT	I	0_10	AIII	1.20351		NTC8	BII	0	-15	0.987384	1.53928
P48	NT	I	0_10	AIII	0.478497		NTC8	BIII	30	-15	0.448667	0.122166
P37	NT	I	10_20	BI	0.563117		NTC8	CI	-30	-25	0.496042	0.1585
P48	NT	I	10_20	BI	0.0960696		NTC8	CII	0	-25	0.750931	0.864089
P37	NT	I	10_20	BII	1.60441		NTC8	CIII	30	-25	0.733896	0.0462746
P48	NT	I	10_20	BII	0.437439		NTC8	DI	-30	-35	0.208547	0.134929
P37	NT	I	10_20	BIII	0.689592		NTC8	DII	0	-35	0.772789	0.64895
P48	NT	I	10_20	BIII	0.20951		NTC8	DIII	30	-35	0.187842	0.0375861
P37	NT	I	20_30	CI	0.828372		NTC8	EI	-30	-45	0.230268	0.0555876
P48	NT	I	20_30	CI	0.112095		NTC8	EII	0	-45	0.740066	0.396835
P37	NT	I	20_30	CII	0.292306		NTC8	EIII	30	-45	0.342765	0.00729163
P48	NT	I	20_30	CII	0.24515
P37	NT	I	20_30	CIII	0.149304
P48	NT	I	20_30	CIII	0.163837
P37	NT	I	30_40	DI	0.190319
P48	NT	I	30_40	DI	0.422736
P37	NT	I	30_40	DII	0.372294
P48	NT	I	30_40	DII	0.337663
P37	NT	I	30_40	DIII	0.314418
P48	NT	I	30_40	DIII	0.120993
P37	NT	I	40_50	EI	0.19515
P48	NT	I	40_50	EI	0.0845668
P37	NT	I	40_50	EII	0.809276
P48	NT	I	40_50	EII	0.330928
P37	NT	I	40_50	EIII	0.370065
P48	NT	I	40_50	EIII	0.0494668
P43	NT	III	0_10	AI	0.482419
P43	NT	III	0_10	AII	2.53002
P43	NT	III	0_10	AIII	0.826569
P43	NT	III	10_20	BI	0.399909
P43	NT	III	10_20	BII	0.779806
P43	NT	III	10_20	BIII	0.446378
P43	NT	III	20_30	CI	0.216654
P43	NT	III	20_30	CII	0.72924
P43	NT	III	20_30	CIII	0.36252
P43	NT	III	30_40	DI	0.219343
P43	NT	III	30_40	DII	0.52461
P43	NT	III	30_40	DIII	0.219343
P43	NT	III	40_50	EI	0.292337
P43	NT	III	40_50	EII	0.4625
P43	NT	III	40_50	EIII	0.27763
P10	NT	II	0_10	AI	0.991483
P10	NT	II	0_10	AII	1.49015
P10	NT	II	0_10	AIII	2.42942
P10	NT	II	10_20	BI	0.363706
P10	NT	II	10_20	BII	1.62296
P10	NT	II	10_20	BIII	0.439099
P10	NT	II	20_30	CI	0.317843
P10	NT	II	20_30	CII	0.808774
P10	NT	II	20_30	CIII	0.506979
P10	NT	II	30_40	DI	0.142182
P10	NT	II	30_40	DII	0.31686
P10	NT	II	30_40	DIII	0.657261
P10	NT	II	40_50	EI	0.195628
P10	NT	II	40_50	EII	0.61307
P10	NT	II	40_50	EIII	0.276324
P15	NTC4	II	0_10	AI	0.224147
P15	NTC4	II	0_10	AII	0.795427
P15	NTC4	II	0_10	AIII	0.668308
P15	NTC4	II	10_20	BI	0.0794989
P15	NTC4	II	10_20	BII	0.854993
P15	NTC4	II	10_20	BIII	0.177348
P15	NTC4	II	20_30	CI	0.158906
P15	NTC4	II	20_30	CII	1.18577
P15	NTC4	II	20_30	CIII	0.234059
P15	NTC4	II	30_40	DI	0.0433594
P15	NTC4	II	30_40	DII	0.754215
P15	NTC4	II	30_40	DIII	0.265003
P15	NTC4	II	40_50	EI	0.0441605
P15	NTC4	II	40_50	EII	1.36023
P15	NTC4	II	40_50	EIII	0.470462
P30	NTC4	III	0_10	AI	0.320252
P30	NTC4	III	0_10	AII	6.48994
P30	NTC4	III	0_10	AIII	0.325023
P30	NTC4	III	10_20	BI	0.323513
P30	NTC4	III	10_20	BII	1.13064
P30	NTC4	III	10_20	BIII	0.171937
P30	NTC4	III	20_30	CI	0.177625
P30	NTC4	III	20_30	CII	1.25884
P30	NTC4	III	20_30	CIII	0.0580127
P30	NTC4	III	30_40	DI	0.585836
P30	NTC4	III	30_40	DII	0.597797
P30	NTC4	III	30_40	DIII	0.0532279
P30	NTC4	III	40_50	EI	0.146342
P30	NTC4	III	40_50	EII	1.50036
P30	NTC4	III	40_50	EIII	0
P25	NTC8	I	0_10	AI	0.915233
P25	NTC8	I	0_10	AII	4.1454
P25	NTC8	I	0_10	AIII	0.682288
P25	NTC8	I	10_20	BI	0.518728
P25	NTC8	I	10_20	BII	1.19951
P25	NTC8	I	10_20	BIII	1.10999
P25	NTC8	I	20_30	CI	0.681567
P25	NTC8	I	20_30	CII	1.03499
P25	NTC8	I	20_30	CIII	1.48934
P25	NTC8	I	30_40	DI	0.314197
P25	NTC8	I	30_40	DII	0.661664
P25	NTC8	I	30_40	DIII	0.232276
P25	NTC8	I	40_50	EI	0.234247
P25	NTC8	I	40_50	EII	0.982641
P25	NTC8	I	40_50	EIII	0.351466
P3	NTC8	II	0_10	AI	1.4023
P3	NTC8	II	0_10	AII	6.01843
P3	NTC8	II	0_10	AIII	0.407577
P3	NTC8	II	10_20	BI	0.294664
P3	NTC8	II	10_20	BII	0.875311
P3	NTC8	II	10_20	BIII	0.052663
P3	NTC8	II	20_30	CI	0.50339
P3	NTC8	II	20_30	CII	0.839275
P3	NTC8	II	20_30	CIII	0.185489
P3	NTC8	II	30_40	DI	0.220542
P3	NTC8	II	30_40	DII	1.15651
P3	NTC8	II	30_40	DIII	0.212704
P3	NTC8	II	40_50	EI	0.235362
P3	NTC8	II	40_50	EII	0.767584
P3	NTC8	II	40_50	EIII	0.178738
P42	NTC8	III	0_10	AI	0.482751
P42	NTC8	III	0_10	AII	8.14281
P42	NTC8	III	0_10	AIII	0.106323
P42	NTC8	III	10_20	BI	1.19467
P42	NTC8	III	10_20	BII	0.887326
P42	NTC8	III	10_20	BIII	0.183342
P42	NTC8	III	20_30	CI	0.30317
P42	NTC8	III	20_30	CII	0.378531
P42	NTC8	III	20_30	CIII	0.52686
P42	NTC8	III	30_40	DI	0.0909013
P42	NTC8	III	30_40	DII	0.500193
P42	NTC8	III	30_40	DIII	0.118546
P42	NTC8	III	40_50	EI	0.221196
P42	NTC8	III	40_50	EII	0.469973
P42	NTC8	III	40_50	EIII	0.498091

## Sheet: Figure 9
FIGURE 9 | One-dimensional distribution (1D) of root length density (RLD) of maize simulated, measured, and expected without stress under (A) reduced tillage system (MTC), (B) no-tillage system (NT), (C) no-tillage system with four tractor passes (NTC4), or (D) no-tillage system with eight harvester passes (NTC8), and (E) relationship of simulated and measured RLD in a Rhodic Eutrudox. RMSE: root…
				Figure 9	Figure 9	Figure 9			Averange of root length density measured, simulated and expected from the treatments
Field Plot number	Treatment	Block	Soil layer (cm)	Root length density measured (cm cm-3)	Root length density simulated (cm cm-3)	Root length density expected (cm cm-3)			Treatment	Soil layer (cm)	Root length density measured (cm cm-3)	Root length density simulated (cm cm-3)	Root length density expected (cm cm-3)
P36	MTC	I	0_10	0.45997	2.2345	2.9163			MTC	0_10	1.082	2.2345	2.9163
P36	MTC	I	10_20	0.602994	1.6167	2.6293			MTC	10_20	0.5766	1.6167	2.6293
P36	MTC	I	20_30	0.479989	0.875	2.2316			MTC	20_30	0.5065	0.875	2.2316
P36	MTC	I	30_40	0.121731	0.6706	1.9826			MTC	30_40	0.2662	0.6706	1.9826
P36	MTC	I	40_50	0.206279	0.4418	1.6688			MTC	40_50	0.3047	0.4418	1.6688
P22	MTC	II	0_10	1.61325	2.2345	2.9163			NT	0_10	1.6705	2.1202	2.9163
P22	MTC	II	10_20	0.615163	1.6167	2.6293			NT	10_20	0.7677	1.2323	2.6293
P22	MTC	II	20_30	0.597161	0.875	2.2316			NT	20_30	0.468	0.7488	2.2316
P22	MTC	II	30_40	0.328539	0.6706	1.9826			NT	30_40	0.3285	0.5616	1.9826
P22	MTC	II	40_50	0.460117	0.4418	1.6688			NT	40_50	0.388	0.3326	1.6688
P31	MTC	III	0_10	1.1728	2.2345	2.9163			NTC4	0_10	1.4879	1.842	2.8039
P31	MTC	III	10_20	0.511688	1.6167	2.6293			NTC4	10_20	0.3868	0.9843	2.6461
P31	MTC	III	20_30	0.442328	0.875	2.2316			NTC4	20_30	0.3994	0.5687	2.232
P31	MTC	III	30_40	0.348194	0.6706	1.9826			NTC4	30_40	0.3534	0.4181	1.9837
P31	MTC	III	40_50	0.247572	0.4418	1.6688			NTC4	40_50	0.4429	0.2392	1.7271
P37	NT	I	0_10	2.09492	2.1202	2.9163			NTC8	0_10	2.4781	2.181	2.856
P37	NT	I	10_20	0.952373	1.2323	2.6293			NTC8	10_20	0.7018	1.1293	2.6261
P37	NT	I	20_30	0.423327	0.7488	2.2316			NTC8	20_30	0.6603	0.698	2.2629
P37	NT	I	30_40	0.292344	0.5616	1.9826			NTC8	30_40	0.3897	0.4999	2.0003
P37	NT	I	40_50	0.458164	0.3326	1.6688			NTC8	40_50	0.4377	0.2922	1.6895
P10	NT	II	0_10	1.63702	2.1202	2.9163
P10	NT	II	10_20	0.808589	1.2323	2.6293
P10	NT	II	20_30	0.544532	0.7488	2.2316
P10	NT	II	30_40	0.372101	0.5616	1.9826
P10	NT	II	40_50	0.361674	0.3326	1.6688
P43	NT	III	0_10	1.27967	2.1202	2.9163
P43	NT	III	10_20	0.542031	1.2323	2.6293
P43	NT	III	20_30	0.436138	0.7488	2.2316
P43	NT	III	30_40	0.321099	0.5616	1.9826
P43	NT	III	40_50	0.344156	0.3326	1.6688
P48	NTC4	I	0_10	1.52252	1.842	2.8039
P48	NTC4	I	10_20	0.247673	0.9843	2.6461
P48	NTC4	I	20_30	0.173694	0.5687	2.232
P48	NTC4	I	30_40	0.293797	0.4181	1.9837
P48	NTC4	I	40_50	0.154987	0.2392	1.7271
P15	NTC4	II	0_10	0.562627	1.842	2.8039
P15	NTC4	II	10_20	0.370613	0.9843	2.6461
P15	NTC4	II	20_30	0.526244	0.5687	2.232
P15	NTC4	II	30_40	0.354193	0.4181	1.9837
P15	NTC4	II	40_50	0.624952	0.2392	1.7271
P30	NTC4	III	0_10	2.37841	1.842	2.8039
P30	NTC4	III	10_20	0.54203	0.9843	2.6461
P30	NTC4	III	20_30	0.498159	0.5687	2.232
P30	NTC4	III	30_40	0.412287	0.4181	1.9837
P30	NTC4	III	40_50	0.5489	0.2392	1.7271
P25	NTC8	I	0_10	1.91431	2.181	2.856
P25	NTC8	I	10_20	0.942745	1.1293	2.6261
P25	NTC8	I	20_30	1.06863	0.698	2.2629
P25	NTC8	I	30_40	0.402712	0.4999	2.0003
P25	NTC8	I	40_50	0.522785	0.2922	1.6895
P3	NTC8	II	0_10	2.60944	2.181	2.856
P3	NTC8	II	10_20	0.407546	1.1293	2.6261
P3	NTC8	II	20_30	0.509385	0.698	2.2629
P3	NTC8	II	30_40	0.529918	0.4999	2.0003
P3	NTC8	II	40_50	0.393895	0.2922	1.6895
P42	NTC8	III	0_10	2.91063	2.181	2.856
P42	NTC8	III	10_20	0.755113	1.1293	2.6261
P42	NTC8	III	20_30	0.402854	0.698	2.2629
P42	NTC8	III	30_40	0.236547	0.4999	2.0003
P42	NTC8	III	40_50	0.39642	0.2922	1.6895

## Sheet: Figure 10
FIGURE 10 | Modeling the dynamics of the stress reduction function for root elongation and root system depth (dotted lines) under (A) reduced tillage system, (B) no-tillage system, (C) no-tillage system with four tractor passes, or (D) no-tillage system with eight harvester passes in a Rhodic Eutrudox.
							Stress reduction function for root elongation; Treatment: MTC
	Rooting depth (cm)						Soil depth (cm)
Time (days)	MTC	NT	NTC4	NTC8		Time (days)	1 cm	2 cm	3 cm	4 cm	5 cm	6 cm	7 cm	8 cm	9 cm	10 cm	11 cm	12 cm	13 cm	14 cm	15 cm	16 cm	17 cm	18 cm	19 cm	20 cm	21 cm	22 cm	23 cm	24 cm	25 cm	26 cm	27 cm	28 cm	29 cm	30 cm	31 cm	32 cm	33 cm	34 cm	35 cm	36 cm	37 cm	38 cm	39 cm	40 cm	41 cm	42 cm	43 cm
1	0	0	0	0		1	0.4267	0.4277	0.4287	0.4297	0.4307	0.4316	0.4325	0.4333	0.4341	0.4349	0.5288	0.5292	0.5296	0.53	0.5304	0.5308	0.5312	0.5316	0.532	0.5324	0.4514	0.4517	0.4521	0.4524	0.4528	0.4531	0.4534	0.4538	0.4541	0.4544	0.6756	0.6759	0.6762	0.6765	0.6767	0.677	0.6773	0.6776	0.6779	0.6782	0.7597	0.7599	0.7602
2	4	4	3	4		2	0.371	0.3753	0.3795	0.3834	0.3871	0.3906	0.394	0.3973	0.4004	0.4034	0.5036	0.5044	0.5053	0.5061	0.507	0.5078	0.5086	0.5094	0.5101	0.5109	0.4316	0.4319	0.4323	0.4326	0.4329	0.4333	0.4336	0.434	0.4343	0.4347	0.6575	0.6579	0.6582	0.6585	0.6589	0.6592	0.6595	0.6599	0.6602	0.6605	0.7444	0.7447	0.745
3	5	5	4	5		3	0.3286	0.3354	0.3417	0.3476	0.3531	0.3583	0.3632	0.3678	0.3722	0.3764	0.4811	0.4822	0.4833	0.4843	0.4853	0.4864	0.4874	0.4883	0.4893	0.4902	0.4126	0.4129	0.4132	0.4136	0.4139	0.4142	0.4145	0.4149	0.4152	0.4155	0.6395	0.6399	0.6403	0.6406	0.6409	0.6413	0.6416	0.642	0.6423	0.6426	0.7288	0.7291	0.7294
4	5	5	5	5		4	0.3242	0.3292	0.334	0.3385	0.3427	0.3468	0.3507	0.3544	0.3579	0.3613	0.4677	0.4686	0.4695	0.4704	0.4712	0.4721	0.473	0.4738	0.4746	0.4754	0.3989	0.3992	0.3995	0.3998	0.4001	0.4004	0.4007	0.401	0.4013	0.4016	0.626	0.6263	0.6267	0.627	0.6273	0.6276	0.6279	0.6282	0.6285	0.6288	0.7166	0.7168	0.7171
5	6	6	6	6		5	0.3281	0.3312	0.3342	0.3371	0.3399	0.3426	0.3451	0.3477	0.3501	0.3524	0.4595	0.4602	0.4608	0.4615	0.4622	0.4628	0.4635	0.4641	0.4647	0.4653	0.3896	0.3899	0.3902	0.3904	0.3907	0.3909	0.3912	0.3915	0.3917	0.392	0.6166	0.6168	0.6171	0.6174	0.6177	0.618	0.6182	0.6185	0.6188	0.6191	0.7078	0.708	0.7083
6	7	7	7	7		6	0.5627	0.5578	0.5526	0.547	0.5411	0.5348	0.528	0.5207	0.5128	0.5042	0.5796	0.5777	0.5758	0.5738	0.5717	0.5696	0.5675	0.5653	0.563	0.5607	0.4772	0.4772	0.4773	0.4773	0.4774	0.4774	0.4775	0.4776	0.4776	0.4777	0.6958	0.6957	0.6955	0.6953	0.6952	0.6951	0.6949	0.6948	0.6947	0.6945	0.7733	0.7731	0.773
7	8	8	8	8		7	0.4626	0.4617	0.4609	0.46	0.4591	0.4582	0.4572	0.4562	0.4552	0.4542	0.5436	0.5436	0.5436	0.5436	0.5436	0.5437	0.5437	0.5437	0.5437	0.5437	0.4618	0.4621	0.4625	0.4628	0.4631	0.4634	0.4637	0.464	0.4643	0.4647	0.6846	0.6849	0.6851	0.6854	0.6856	0.6859	0.6861	0.6863	0.6866	0.6868	0.767	0.7672	0.7674
8	9	9	8	9		8	0.6325	0.6293	0.6258	0.6222	0.6183	0.6142	0.6099	0.6052	0.6003	0.595	0.6485	0.6476	0.6466	0.6456	0.6446	0.6436	0.6425	0.6414	0.6403	0.6392	0.5512	0.5516	0.552	0.5524	0.5528	0.5532	0.5536	0.5541	0.5545	0.5549	0.7595	0.7597	0.7599	0.7601	0.7603	0.7605	0.7607	0.7609	0.7612	0.7614	0.8289	0.829	0.8292
9	10	10	9	10		9	0.5479	0.5469	0.5458	0.5447	0.5436	0.5424	0.5412	0.54	0.5387	0.5373	0.6076	0.6076	0.6077	0.6077	0.6077	0.6078	0.6078	0.6078	0.6078	0.6078	0.5219	0.5224	0.5228	0.5233	0.5238	0.5242	0.5247	0.5252	0.5256	0.5261	0.7367	0.737	0.7374	0.7377	0.738	0.7384	0.7387	0.7391	0.7394	0.7397	0.8113	0.8116	0.8119
10	10	10	10	10		10	0.4479	0.4511	0.4541	0.457	0.4597	0.4624	0.4649	0.4674	0.4697	0.472	0.5588	0.5596	0.5604	0.5612	0.5619	0.5626	0.5634	0.5641	0.5648	0.5655	0.4823	0.4828	0.4832	0.4837	0.4841	0.4845	0.485	0.4854	0.4859	0.4863	0.7036	0.704	0.7043	0.7047	0.7051	0.7055	0.7059	0.7062	0.7066	0.707	0.7842	0.7845	0.7848
11	11	11	11	11		11	0.3838	0.3899	0.3955	0.4008	0.4058	0.4105	0.415	0.4192	0.4232	0.4271	0.5234	0.5245	0.5256	0.5266	0.5276	0.5286	0.5296	0.5305	0.5315	0.5324	0.4516	0.452	0.4524	0.4528	0.4532	0.4536	0.454	0.4544	0.4547	0.4551	0.6762	0.6766	0.677	0.6774	0.6778	0.6782	0.6785	0.6789	0.6793	0.6796	0.761	0.7613	0.7616
12	12	12	11	11		12	0.3899	0.3925	0.3951	0.3976	0.4	0.4023	0.4045	0.4067	0.4088	0.4108	0.5094	0.5101	0.5108	0.5114	0.512	0.5127	0.5133	0.5139	0.5145	0.5151	0.4354	0.4358	0.4361	0.4364	0.4368	0.4371	0.4374	0.4378	0.4381	0.4384	0.661	0.6613	0.6616	0.6619	0.6622	0.6626	0.6629	0.6632	0.6635	0.6638	0.7473	0.7475	0.7478
13	13	12	11	12		13	0.3544	0.3588	0.3629	0.3669	0.3706	0.3742	0.3777	0.381	0.3841	0.3872	0.4899	0.4907	0.4916	0.4924	0.4932	0.494	0.4948	0.4956	0.4964	0.4971	0.4189	0.4192	0.4195	0.4198	0.4202	0.4205	0.4208	0.4211	0.4214	0.4218	0.6454	0.6458	0.6461	0.6464	0.6467	0.6471	0.6474	0.6477	0.648	0.6483	0.7338	0.7341	0.7343
14	14	13	12	12		14	0.4974	0.4935	0.4894	0.4851	0.4807	0.4761	0.4713	0.4662	0.4609	0.4553	0.5428	0.5417	0.5406	0.5395	0.5383	0.5372	0.5361	0.5349	0.5337	0.5326	0.4512	0.4514	0.4515	0.4517	0.4518	0.452	0.4522	0.4523	0.4525	0.4526	0.6738	0.6738	0.6738	0.6738	0.6739	0.6739	0.674	0.674	0.6741	0.6741	0.756	0.756	0.756
15	14	13	12	13		15	0.5355	0.5319	0.5282	0.5244	0.5204	0.5162	0.5119	0.5073	0.5025	0.4975	0.5759	0.575	0.5741	0.5731	0.5721	0.5712	0.5702	0.5692	0.5682	0.5672	0.4835	0.4837	0.484	0.4842	0.4844	0.4847	0.4849	0.4852	0.4854	0.4857	0.7028	0.7029	0.703	0.7031	0.7032	0.7033	0.7035	0.7036	0.7037	0.7038	0.7813	0.7814	0.7815
16	15	14	13	13		16	0.3768	0.3833	0.3893	0.395	0.4003	0.4053	0.41	0.4145	0.4187	0.4228	0.52	0.5211	0.5222	0.5233	0.5243	0.5254	0.5264	0.5274	0.5283	0.5293	0.4486	0.449	0.4494	0.4498	0.4502	0.4506	0.451	0.4514	0.4518	0.4522	0.6736	0.674	0.6744	0.6748	0.6751	0.6755	0.6759	0.6763	0.6766	0.677	0.7587	0.759	0.7593
17	16	14	13	13		17	0.3259	0.3351	0.3435	0.3513	0.3584	0.365	0.3712	0.3771	0.3825	0.3877	0.491	0.4924	0.4936	0.4949	0.4961	0.4973	0.4985	0.4997	0.5008	0.5019	0.4233	0.4237	0.4241	0.4244	0.4248	0.4252	0.4255	0.4259	0.4263	0.4266	0.6501	0.6505	0.6509	0.6512	0.6516	0.652	0.6524	0.6528	0.6531	0.6535	0.7383	0.7387	0.739
18	17	15	14	14		18	0.3404	0.3449	0.3491	0.3531	0.357	0.3607	0.3642	0.3676	0.3709	0.3741	0.4787	0.4796	0.4804	0.4813	0.4821	0.4829	0.4837	0.4845	0.4853	0.4861	0.4087	0.409	0.4093	0.4096	0.4099	0.4102	0.4106	0.4109	0.4112	0.4115	0.6356	0.636	0.6363	0.6366	0.6369	0.6372	0.6375	0.6379	0.6382	0.6385	0.7251	0.7254	0.7257
19	17	15	14	14		19	0.4265	0.424	0.4215	0.4189	0.4162	0.4136	0.4108	0.408	0.4052	0.4023	0.5005	0.5	0.4996	0.4991	0.4987	0.4982	0.4977	0.4973	0.4968	0.4964	0.4179	0.4181	0.4183	0.4185	0.4187	0.4188	0.419	0.4192	0.4194	0.4196	0.6433	0.6434	0.6435	0.6436	0.6437	0.6439	0.644	0.6441	0.6443	0.6444	0.7302	0.7303	0.7304
20	18	15	14	14		20	0.4159	0.4143	0.4127	0.4111	0.4095	0.4078	0.4061	0.4045	0.4027	0.401	0.4999	0.4997	0.4995	0.4993	0.4991	0.4989	0.4987	0.4985	0.4983	0.4981	0.4196	0.4198	0.42	0.4202	0.4204	0.4206	0.4209	0.4211	0.4213	0.4215	0.6451	0.6453	0.6454	0.6456	0.6458	0.6459	0.6461	0.6463	0.6464	0.6466	0.7322	0.7323	0.7324
21	19	16	15	15		21	0.2975	0.3066	0.3149	0.3224	0.3294	0.336	0.342	0.3477	0.353	0.3581	0.4654	0.4666	0.4678	0.469	0.4702	0.4714	0.4725	0.4736	0.4747	0.4757	0.3992	0.3996	0.3999	0.4002	0.4005	0.4009	0.4012	0.4015	0.4018	0.4021	0.6266	0.6269	0.6273	0.6277	0.628	0.6284	0.6287	0.629	0.6294	0.6297	0.7174	0.7177	0.718
22	20	16	15	15		22	0.5958	0.5913	0.5866	0.5815	0.576	0.5702	0.564	0.5573	0.55	0.5421	0.6086	0.6069	0.6051	0.6033	0.6015	0.5996	0.5976	0.5956	0.5936	0.5915	0.506	0.5062	0.5063	0.5064	0.5066	0.5067	0.5069	0.5071	0.5072	0.5074	0.7211	0.721	0.7209	0.7209	0.7208	0.7207	0.7207	0.7206	0.7206	0.7206	0.7952	0.7951	0.7951
23	20	17	16	16		23	0.6733	0.6707	0.6679	0.6649	0.6617	0.6584	0.6548	0.651	0.6469	0.6426	0.6831	0.6824	0.6817	0.681	0.6803	0.6795	0.6788	0.678	0.6772	0.6763	0.5864	0.587	0.5876	0.5882	0.5887	0.5893	0.5899	0.5905	0.5912	0.5918	0.7875	0.7879	0.7882	0.7886	0.7889	0.7893	0.7896	0.79	0.7904	0.7907	0.8525	0.8527	0.853
24	21	18	16	16		24	0.509	0.5104	0.5118	0.5131	0.5144	0.5156	0.5168	0.5179	0.519	0.5201	0.5955	0.5961	0.5966	0.5972	0.5978	0.5983	0.5989	0.5994	0.5999	0.6005	0.5151	0.5156	0.5161	0.5166	0.5171	0.5176	0.5181	0.5187	0.5192	0.5197	0.7315	0.7319	0.7323	0.7327	0.7331	0.7335	0.7339	0.7343	0.7347	0.7351	0.8076	0.8079	0.8082
25	21	19	17	17		25	0.4446	0.4475	0.4502	0.4529	0.4555	0.458	0.4604	0.4628	0.465	0.4672	0.5551	0.5558	0.5566	0.5574	0.5581	0.5588	0.5596	0.5603	0.561	0.5616	0.4787	0.4792	0.4796	0.48	0.4805	0.4809	0.4813	0.4818	0.4822	0.4826	0.7004	0.7008	0.7012	0.7015	0.7019	0.7023	0.7027	0.703	0.7034	0.7038	0.7814	0.7817	0.782
26	22	19	18	18		26	0.3883	0.3933	0.3981	0.4026	0.4069	0.4111	0.415	0.4188	0.4224	0.4259	0.5224	0.5234	0.5244	0.5253	0.5263	0.5272	0.5281	0.529	0.5299	0.5308	0.45	0.4504	0.4508	0.4512	0.4516	0.452	0.4524	0.4528	0.4532	0.4536	0.6748	0.6752	0.6756	0.6759	0.6763	0.6767	0.677	0.6774	0.6778	0.6781	0.7597	0.76	0.7603
27	22	20	18	18		27	0.3502	0.3564	0.3622	0.3676	0.3728	0.3777	0.3824	0.3868	0.3911	0.3951	0.497	0.4981	0.4992	0.5002	0.5013	0.5023	0.5033	0.5043	0.5052	0.5062	0.4272	0.4276	0.428	0.4283	0.4287	0.429	0.4294	0.4297	0.4301	0.4304	0.6536	0.654	0.6544	0.6547	0.6551	0.6555	0.6558	0.6562	0.6565	0.6569	0.7413	0.7416	0.7419
28	23	20	18	18		28	0.3354	0.3406	0.3456	0.3503	0.3548	0.3591	0.3633	0.3673	0.3711	0.3747	0.4794	0.4804	0.4814	0.4823	0.4833	0.4842	0.4851	0.486	0.4869	0.4878	0.4103	0.4106	0.4109	0.4112	0.4116	0.4119	0.4122	0.4125	0.4128	0.4132	0.6373	0.6376	0.6379	0.6383	0.6386	0.6389	0.6393	0.6396	0.6399	0.6403	0.7267	0.727	0.7273
29	23	21	19	19		29	0.3311	0.3349	0.3386	0.3421	0.3455	0.3488	0.352	0.3551	0.3581	0.361	0.4672	0.4681	0.4689	0.4697	0.4705	0.4713	0.472	0.4728	0.4735	0.4743	0.3978	0.3981	0.3984	0.3987	0.399	0.3993	0.3996	0.3999	0.4002	0.4004	0.6249	0.6252	0.6255	0.6258	0.6261	0.6264	0.6267	0.627	0.6273	0.6276	0.7155	0.7157	0.716
30	24	21	19	19		30	0.3263	0.3293	0.3321	0.3349	0.3376	0.3402	0.3428	0.3454	0.3479	0.3503	0.4575	0.4582	0.4589	0.4596	0.4603	0.461	0.4617	0.4623	0.463	0.4636	0.3881	0.3884	0.3886	0.3889	0.3892	0.3894	0.3897	0.3899	0.3902	0.3905	0.615	0.6153	0.6156	0.6159	0.6162	0.6165	0.6167	0.617	0.6173	0.6176	0.7065	0.7067	0.707
31	24	21	20	20		31	0.418	0.4145	0.411	0.4073	0.4037	0.3999	0.3961	0.3923	0.3883	0.3842	0.4847	0.484	0.4832	0.4825	0.4818	0.481	0.4803	0.4796	0.4788	0.4781	0.4011	0.4012	0.4013	0.4015	0.4016	0.4017	0.4019	0.402	0.4021	0.4023	0.6265	0.6266	0.6267	0.6267	0.6268	0.6268	0.6269	0.627	0.6271	0.6271	0.7148	0.7149	0.715
32	25	22	20	20		32	0.6632	0.6597	0.656	0.652	0.6478	0.6433	0.6384	0.6331	0.6274	0.6212	0.667	0.6657	0.6644	0.6631	0.6618	0.6604	0.659	0.6575	0.656	0.6544	0.5655	0.5659	0.5663	0.5667	0.5671	0.5675	0.5679	0.5683	0.5687	0.5691	0.7704	0.7705	0.7707	0.7709	0.771	0.7712	0.7714	0.7715	0.7717	0.7719	0.8373	0.8374	0.8376
33	26	22	21	21		33	0.5673	0.566	0.5645	0.563	0.5615	0.5598	0.5582	0.5565	0.5547	0.5528	0.6189	0.6189	0.6188	0.6187	0.6187	0.6186	0.6185	0.6185	0.6184	0.6183	0.5318	0.5322	0.5327	0.5332	0.5337	0.5342	0.5347	0.5352	0.5357	0.5362	0.7448	0.7451	0.7454	0.7458	0.7461	0.7465	0.7468	0.7472	0.7475	0.7479	0.818	0.8182	0.8185
34	26	23	21	21		34	0.4701	0.4719	0.4737	0.4754	0.4771	0.4787	0.4803	0.4818	0.4833	0.4847	0.5685	0.5691	0.5697	0.5704	0.571	0.5716	0.5722	0.5728	0.5734	0.574	0.4903	0.4907	0.4912	0.4916	0.4921	0.4925	0.493	0.4934	0.4939	0.4944	0.7104	0.7108	0.7112	0.7116	0.7119	0.7123	0.7127	0.7131	0.7134	0.7138	0.7899	0.7902	0.7905
35	27	23	22	22		35	0.4123	0.4157	0.419	0.4222	0.4254	0.4284	0.4313	0.4342	0.437	0.4397	0.5333	0.5342	0.535	0.5359	0.5367	0.5376	0.5384	0.5392	0.54	0.5408	0.4593	0.4598	0.4602	0.4606	0.461	0.4614	0.4618	0.4622	0.4626	0.463	0.6832	0.6836	0.684	0.6844	0.6847	0.6851	0.6855	0.6858	0.6862	0.6866	0.7669	0.7672	0.7675
36	27	24	23	22		36	0.3685	0.3732	0.3777	0.382	0.3862	0.3902	0.3941	0.3978	0.4014	0.4049	0.505	0.506	0.507	0.508	0.509	0.5099	0.5109	0.5118	0.5127	0.5136	0.4341	0.4345	0.4349	0.4353	0.4356	0.436	0.4364	0.4367	0.4371	0.4375	0.6601	0.6605	0.6609	0.6613	0.6616	0.662	0.6624	0.6627	0.6631	0.6634	0.747	0.7473	0.7476
37	28	25	23	23		37	0.3455	0.35	0.3543	0.3584	0.3624	0.3662	0.37	0.3736	0.3771	0.3805	0.4843	0.4853	0.4862	0.4872	0.4881	0.4891	0.49	0.4909	0.4918	0.4927	0.4148	0.4151	0.4155	0.4158	0.4161	0.4165	0.4168	0.4171	0.4175	0.4178	0.6417	0.642	0.6424	0.6428	0.6431	0.6434	0.6438	0.6441	0.6445	0.6448	0.7307	0.731	0.7313
38	28	25	24	24		38	0.3366	0.3399	0.3431	0.3462	0.3493	0.3523	0.3553	0.3582	0.361	0.3638	0.4696	0.4704	0.4712	0.4721	0.4729	0.4737	0.4745	0.4753	0.4761	0.4769	0.4002	0.4005	0.4008	0.4011	0.4014	0.4017	0.402	0.4023	0.4026	0.4029	0.6274	0.6277	0.628	0.6283	0.6287	0.629	0.6293	0.6296	0.6299	0.6302	0.7178	0.7181	0.7184
39	29	25	24	24		39	0.3289	0.3314	0.3339	0.3363	0.3387	0.3411	0.3435	0.3459	0.3482	0.3505	0.4577	0.4584	0.4591	0.4598	0.4606	0.4613	0.462	0.4627	0.4634	0.4641	0.3885	0.3888	0.3891	0.3894	0.3896	0.3899	0.3902	0.3905	0.3907	0.391	0.6156	0.6159	0.6162	0.6165	0.6168	0.6171	0.6174	0.6177	0.618	0.6183	0.7071	0.7074	0.7077
40	29	26	25	24		40	0.3223	0.3242	0.3261	0.328	0.3299	0.3318	0.3337	0.3356	0.3376	0.3395	0.4477	0.4483	0.4489	0.4496	0.4502	0.4508	0.4515	0.4521	0.4527	0.4534	0.3787	0.379	0.3792	0.3795	0.3797	0.38	0.3803	0.3805	0.3808	0.381	0.6056	0.6059	0.6062	0.6065	0.6067	0.607	0.6073	0.6076	0.6079	0.6081	0.698	0.6982	0.6985
41	29	26	25	25		41	0.3147	0.3163	0.3179	0.3195	0.3211	0.3227	0.3244	0.3261	0.3278	0.3294	0.4385	0.439	0.4396	0.4402	0.4408	0.4414	0.442	0.4426	0.4432	0.4438	0.37	0.3702	0.3705	0.3707	0.3709	0.3712	0.3714	0.3717	0.3719	0.3722	0.5965	0.5968	0.5971	0.5974	0.5977	0.5979	0.5982	0.5985	0.5988	0.599	0.6897	0.6899	0.6902
42	30	27	25	26		42	0.4624	0.457	0.4515	0.4456	0.4394	0.4329	0.4261	0.4188	0.411	0.4026	0.4987	0.4968	0.495	0.4932	0.4913	0.4895	0.4876	0.4857	0.4838	0.4819	0.4043	0.4043	0.4043	0.4043	0.4043	0.4043	0.4043	0.4043	0.4044	0.4044	0.6285	0.6283	0.6282	0.628	0.6279	0.6278	0.6277	0.6276	0.6274	0.6273	0.7149	0.7148	0.7147
43	31	27	26	26		43	0.3282	0.3306	0.3329	0.3352	0.3374	0.3396	0.3417	0.3438	0.3459	0.3479	0.4553	0.4559	0.4566	0.4573	0.4579	0.4586	0.4592	0.4599	0.4605	0.4611	0.3858	0.3861	0.3864	0.3866	0.3869	0.3872	0.3874	0.3877	0.388	0.3882	0.6128	0.6131	0.6134	0.6137	0.614	0.6143	0.6146	0.6149	0.6151	0.6154	0.7045	0.7048	0.705
44	31	28	26	27		44	0.3272	0.328	0.3289	0.3298	0.3307	0.3317	0.3328	0.3339	0.335	0.3362	0.4444	0.4449	0.4453	0.4458	0.4464	0.4469	0.4474	0.4479	0.4485	0.449	0.3747	0.375	0.3752	0.3755	0.3757	0.376	0.3762	0.3765	0.3767	0.377	0.6014	0.6017	0.602	0.6023	0.6026	0.6029	0.6032	0.6034	0.6037	0.604	0.6942	0.6944	0.6947
45	32	28	27	27		45	0.5349	0.5294	0.5236	0.5175	0.5108	0.5037	0.4961	0.4878	0.4787	0.4689	0.5517	0.5495	0.5472	0.5448	0.5424	0.5399	0.5374	0.5348	0.5322	0.5295	0.448	0.448	0.448	0.4479	0.4479	0.4479	0.4479	0.4479	0.4479	0.4479	0.6693	0.669	0.6688	0.6685	0.6683	0.6681	0.6679	0.6677	0.6674	0.6672	0.7498	0.7496	0.7494
46	32	28	28	28		46	0.3939	0.3949	0.3959	0.3969	0.3977	0.3986	0.3993	0.4001	0.4007	0.4014	0.501	0.5014	0.5017	0.502	0.5023	0.5026	0.5029	0.5032	0.5035	0.5038	0.4249	0.4252	0.4254	0.4257	0.426	0.4263	0.4266	0.4269	0.4272	0.4275	0.6508	0.6511	0.6514	0.6516	0.6519	0.6522	0.6525	0.6527	0.653	0.6533	0.7381	0.7383	0.7385
47	33	29	28	28		47	0.363	0.3649	0.3668	0.3686	0.3703	0.3719	0.3735	0.375	0.3764	0.3778	0.4813	0.4818	0.4823	0.4828	0.4833	0.4838	0.4843	0.4848	0.4853	0.4858	0.4084	0.4087	0.409	0.4093	0.4096	0.4099	0.4102	0.4105	0.4108	0.4111	0.6353	0.6356	0.6359	0.6362	0.6365	0.6369	0.6372	0.6375	0.6378	0.6381	0.7248	0.725	0.7253
48	34	29	29	29		48	0.4636	0.4599	0.4561	0.4521	0.448	0.4437	0.4392	0.4345	0.4296	0.4245	0.5181	0.5171	0.5161	0.5151	0.5141	0.5131	0.5121	0.511	0.51	0.509	0.4294	0.4295	0.4297	0.4298	0.43	0.4301	0.4303	0.4304	0.4306	0.4307	0.6537	0.6538	0.6538	0.6539	0.6539	0.654	0.654	0.6541	0.6542	0.6542	0.7388	0.7388	0.7389
49	35	30	29	30		49	0.368	0.3697	0.3714	0.373	0.3746	0.376	0.3774	0.3786	0.3799	0.381	0.4839	0.4844	0.4848	0.4853	0.4857	0.4861	0.4866	0.487	0.4874	0.4878	0.4102	0.4105	0.4107	0.411	0.4113	0.4116	0.4119	0.4122	0.4125	0.4128	0.6369	0.6372	0.6376	0.6379	0.6382	0.6385	0.6388	0.6391	0.6394	0.6397	0.7262	0.7265	0.7267
50	36	30	30	30		50	0.328	0.3312	0.3341	0.337	0.3397	0.3422	0.3447	0.347	0.3493	0.3515	0.4585	0.4592	0.4599	0.4607	0.4614	0.4622	0.4629	0.4637	0.4645	0.4652	0.3896	0.3899	0.3902	0.3905	0.3908	0.3911	0.3914	0.3917	0.3921	0.3924	0.617	0.6174	0.6178	0.6182	0.6186	0.6189	0.6193	0.6197	0.62	0.6204	0.7091	0.7094	0.7097
51	37	31	31	31		51	0.309	0.3121	0.315	0.3177	0.3203	0.3227	0.3251	0.3273	0.3295	0.3315	0.4405	0.4411	0.4418	0.4425	0.4433	0.444	0.4448	0.4455	0.4462	0.447	0.3729	0.3732	0.3735	0.3738	0.3741	0.3744	0.3747	0.375	0.3753	0.3756	0.6001	0.6005	0.6009	0.6012	0.6016	0.602	0.6024	0.6027	0.6031	0.6035	0.6938	0.6941	0.6945
52	37	32	32	32		52	0.5995	0.5946	0.5894	0.5838	0.5777	0.5712	0.5642	0.5565	0.5482	0.5389	0.6056	0.6035	0.6013	0.5991	0.5968	0.5944	0.5919	0.5894	0.5867	0.584	0.4989	0.4989	0.499	0.499	0.4991	0.4991	0.4992	0.4993	0.4994	0.4995	0.7144	0.7142	0.714	0.7139	0.7137	0.7135	0.7134	0.7132	0.7131	0.713	0.7887	0.7886	0.7885
53	38	32	33	33		53	0.4393	0.4404	0.4413	0.4423	0.4431	0.4439	0.4447	0.4454	0.4461	0.4467	0.5382	0.5386	0.5389	0.5393	0.5397	0.54	0.5403	0.5407	0.541	0.5413	0.4597	0.46	0.4604	0.4608	0.4611	0.4615	0.4619	0.4622	0.4626	0.463	0.6832	0.6836	0.6839	0.6843	0.6846	0.6849	0.6853	0.6856	0.686	0.6863	0.7666	0.7669	0.7672
54	39	33	34	34		54	0.4072	0.4085	0.4098	0.411	0.4121	0.4132	0.4142	0.4151	0.416	0.4169	0.514	0.5144	0.5148	0.5152	0.5156	0.5159	0.5163	0.5166	0.5169	0.5172	0.4373	0.4377	0.438	0.4383	0.4387	0.439	0.4393	0.4397	0.44	0.4404	0.6628	0.6632	0.6635	0.6639	0.6642	0.6646	0.6649	0.6652	0.6656	0.6659	0.7491	0.7494	0.7497
55	40	34	34	35		55	0.6222	0.6185	0.6145	0.6103	0.6059	0.6011	0.5961	0.5906	0.5848	0.5785	0.6361	0.6349	0.6336	0.6323	0.6309	0.6296	0.6282	0.6267	0.6253	0.6238	0.5366	0.5369	0.5372	0.5375	0.5378	0.5381	0.5384	0.5388	0.5391	0.5395	0.7473	0.7474	0.7475	0.7476	0.7477	0.7479	0.748	0.7482	0.7483	0.7484	0.8183	0.8184	0.8185
56	41	34	36	36		56	0.482	0.4829	0.4838	0.4846	0.4854	0.4861	0.4867	0.4874	0.4879	0.4885	0.5711	0.5715	0.5719	0.5723	0.5727	0.5731	0.5734	0.5738	0.5742	0.5745	0.4907	0.4911	0.4915	0.492	0.4924	0.4929	0.4933	0.4937	0.4942	0.4946	0.7107	0.7111	0.7114	0.7118	0.7122	0.7126	0.7129	0.7133	0.7137	0.7141	0.7901	0.7904	0.7907
57	42	35	36	37		57	0.4642	0.4642	0.4642	0.4641	0.464	0.4639	0.4637	0.4635	0.4633	0.463	0.5509	0.5511	0.5513	0.5515	0.5517	0.5519	0.5521	0.5522	0.5524	0.5525	0.4701	0.4705	0.4708	0.4712	0.4716	0.4719	0.4723	0.4727	0.4731	0.4734	0.6924	0.6927	0.6931	0.6934	0.6937	0.694	0.6944	0.6947	0.695	0.6953	0.7743	0.7745	0.7748
58	43	36	37	38		58	0.4233	0.4243	0.4251	0.4259	0.4267	0.4274	0.4281	0.4287	0.4292	0.4297	0.5245	0.5248	0.5251	0.5255	0.5258	0.5261	0.5264	0.5266	0.5269	0.5272	0.4465	0.4469	0.4472	0.4475	0.4479	0.4482	0.4486	0.4489	0.4493	0.4497	0.6713	0.6716	0.672	0.6723	0.6727	0.673	0.6734	0.6737	0.674	0.6744	0.7564	0.7567	0.757
59	44	37	38	38		59	0.3962	0.3972	0.3981	0.399	0.3998	0.4005	0.4012	0.4018	0.4023	0.4028	0.5022	0.5025	0.5028	0.5031	0.5034	0.5037	0.5039	0.5041	0.5044	0.5046	0.4256	0.4259	0.4262	0.4265	0.4268	0.4272	0.4275	0.4278	0.4281	0.4285	0.6518	0.6521	0.6525	0.6528	0.6532	0.6535	0.6539	0.6542	0.6546	0.6549	0.7396	0.7399	0.7401
60	45	37	39	39		60	0.3716	0.3726	0.3735	0.3743	0.3751	0.3758	0.3764	0.377	0.3775	0.3779	0.481	0.4813	0.4816	0.4818	0.482	0.4822	0.4824	0.4826	0.4828	0.483	0.4057	0.4059	0.4062	0.4065	0.4068	0.4071	0.4074	0.4077	0.408	0.4083	0.6326	0.633	0.6334	0.6337	0.6341	0.6344	0.6348	0.6352	0.6355	0.6359	0.7228	0.7231	0.7234
61	45	38	40	40		61	0.3523	0.3531	0.3538	0.3544	0.3549	0.3554	0.3558	0.3562	0.3564	0.3566	0.4624	0.4626	0.4628	0.4629	0.4631	0.4632	0.4633	0.4635	0.4635	0.4636	0.388	0.3882	0.3884	0.3887	0.3889	0.3892	0.3895	0.3898	0.3901	0.3904	0.615	0.6154	0.6158	0.6161	0.6165	0.6169	0.6172	0.6176	0.6179	0.6183	0.7072	0.7075	0.7078
62	46	39	41	41		62	0.3347	0.3353	0.3358	0.3362	0.3366	0.3369	0.3371	0.3372	0.3373	0.3373	0.445	0.4451	0.4453	0.4453	0.4454	0.4455	0.4455	0.4456	0.4456	0.4456	0.3715	0.3717	0.3719	0.3721	0.3724	0.3726	0.3729	0.3732	0.3735	0.3738	0.5982	0.5986	0.599	0.5994	0.5997	0.6001	0.6005	0.6009	0.6012	0.6016	0.6921	0.6924	0.6928
63	47	40	41	42		63	0.317	0.3174	0.3177	0.318	0.3182	0.3183	0.3183	0.3183	0.3181	0.3179	0.4271	0.4272	0.4272	0.4272	0.4272	0.4272	0.4271	0.4271	0.427	0.4269	0.3545	0.3547	0.3549	0.3551	0.3553	0.3556	0.3558	0.3561	0.3564	0.3567	0.5805	0.5809	0.5813	0.5817	0.5821	0.5825	0.5829	0.5833	0.5837	0.5841	0.6761	0.6765	0.6769
64	48	40	42	42		64	0.4785	0.4727	0.4666	0.4601	0.4531	0.4457	0.4377	0.4291	0.4197	0.4095	0.5036	0.5012	0.4988	0.4963	0.4938	0.4912	0.4886	0.4859	0.4831	0.4803	0.4026	0.4025	0.4024	0.4023	0.4022	0.4022	0.4021	0.4021	0.402	0.402	0.6261	0.6258	0.6256	0.6253	0.6251	0.6249	0.6246	0.6244	0.6242	0.624	0.7118	0.7116	0.7114
65	49	41	43	43		65	0.3492	0.3495	0.3497	0.3498	0.3498	0.3498	0.3496	0.3493	0.349	0.3485	0.4549	0.455	0.455	0.455	0.4549	0.4549	0.4548	0.4547	0.4546	0.4545	0.3796	0.3798	0.38	0.3802	0.3804	0.3806	0.3809	0.3812	0.3814	0.3817	0.6063	0.6066	0.6069	0.6072	0.6075	0.6078	0.6081	0.6084	0.6087	0.609	0.6988	0.699	0.6993
66	49	42	44	44		66	0.3278	0.328	0.3281	0.3281	0.328	0.3279	0.3277	0.3274	0.327	0.3265	0.435	0.435	0.435	0.435	0.4349	0.4349	0.4348	0.4347	0.4346	0.4344	0.3614	0.3615	0.3617	0.3619	0.3622	0.3624	0.3626	0.3629	0.3632	0.3635	0.5876	0.588	0.5884	0.5887	0.5891	0.5895	0.5899	0.5902	0.5906	0.591	0.6824	0.6827	0.683
67	50	43	45	45		67	0.3091	0.3092	0.3092	0.3092	0.309	0.3088	0.3085	0.3081	0.3076	0.307	0.4167	0.4167	0.4166	0.4165	0.4164	0.4163	0.4161	0.416	0.4158	0.4155	0.3443	0.3444	0.3446	0.3448	0.345	0.3452	0.3455	0.3457	0.346	0.3463	0.5694	0.5699	0.5703	0.5707	0.5711	0.5716	0.572	0.5724	0.5728	0.5732	0.666	0.6664	0.6668
68	50	44	46	46		68	0.2935	0.2936	0.2937	0.2936	0.2935	0.2933	0.293	0.2927	0.2922	0.2917	0.4021	0.4021	0.402	0.402	0.4019	0.4018	0.4016	0.4015	0.4013	0.4011	0.3313	0.3314	0.3316	0.3318	0.332	0.3322	0.3324	0.3327	0.3329	0.3332	0.5552	0.5556	0.556	0.5564	0.5569	0.5573	0.5577	0.5581	0.5585	0.5589	0.6526	0.653	0.6534
69	51	44	47	47		69	0.2779	0.278	0.278	0.2779	0.2777	0.2775	0.2771	0.2766	0.276	0.2753	0.386	0.3859	0.3858	0.3857	0.3855	0.3853	0.3851	0.3849	0.3846	0.3843	0.3162	0.3163	0.3164	0.3166	0.3168	0.317	0.3173	0.3175	0.3178	0.3181	0.5383	0.5388	0.5392	0.5397	0.5402	0.5406	0.5411	0.5415	0.542	0.5424	0.6371	0.6376	0.638
70	52	45	47	48		70	0.26	0.26	0.2599	0.2597	0.2593	0.2587	0.258	0.2572	0.2562	0.2551	0.3653	0.3651	0.3648	0.3645	0.3641	0.3637	0.3633	0.3628	0.3623	0.3617	0.296	0.2961	0.2963	0.2964	0.2966	0.2969	0.2971	0.2974	0.2977	0.298	0.5151	0.5157	0.5163	0.5169	0.5175	0.5181	0.5187	0.5193	0.5199	0.5205	0.6161	0.6167	0.6173
71	52	45	48	48		71	0.2385	0.2384	0.2381	0.2376	0.237	0.2361	0.235	0.2337	0.2322	0.2304	0.339	0.3387	0.3384	0.3381	0.3379	0.3377	0.3375	0.3372	0.337	0.3368	0.274	0.2742	0.2743	0.2745	0.2748	0.275	0.2753	0.2756	0.276	0.2763	0.4892	0.4899	0.4907	0.4915	0.4922	0.493	0.4937	0.4945	0.4952	0.4959	0.5923	0.593	0.5937
72	53	46	48	49		72	0.2192	0.2191	0.2188	0.2183	0.2176	0.2167	0.2156	0.2142	0.2126	0.2108	0.3175	0.3171	0.3168	0.3165	0.3163	0.3161	0.3159	0.3157	0.3156	0.3154	0.2553	0.2554	0.2556	0.2558	0.256	0.2563	0.2566	0.2569	0.2572	0.2576	0.4658	0.4666	0.4674	0.4683	0.4691	0.47	0.4708	0.4716	0.4724	0.4732	0.5697	0.5706	0.5714
73	53	46	49	49		73	0.2008	0.2007	0.2003	0.1997	0.1989	0.1979	0.1966	0.1951	0.1934	0.1913	0.2951	0.2947	0.2944	0.2942	0.294	0.294	0.2939	0.2939	0.2939	0.2939	0.2366	0.2367	0.2369	0.2371	0.2374	0.2377	0.238	0.2384	0.2387	0.2391	0.4418	0.4427	0.4437	0.4446	0.4456	0.4465	0.4475	0.4484	0.4494	0.4503	0.5465	0.5475	0.5485
74	54	47	49	50		74	0.1777	0.1775	0.1771	0.1765	0.1758	0.175	0.1741	0.1731	0.172	0.1707	0.2708	0.2706	0.2705	0.2706	0.2707	0.2709	0.2712	0.2715	0.2718	0.2722	0.2179	0.2181	0.2183	0.2186	0.2189	0.2192	0.2195	0.2199	0.2203	0.2207	0.4169	0.418	0.4191	0.4202	0.4213	0.4224	0.4235	0.4246	0.4257	0.4267	0.5223	0.5234	0.5246
75	54	48	50	50		75	0.1603	0.1601	0.1598	0.1593	0.1587	0.158	0.1573	0.1565	0.1556	0.1546	0.2508	0.2507	0.2507	0.2508	0.2511	0.2514	0.2518	0.2522	0.2526	0.253	0.2015	0.2017	0.2019	0.2022	0.2025	0.2028	0.2032	0.2035	0.204	0.2044	0.3939	0.3951	0.3963	0.3975	0.3987	0.3999	0.4011	0.4022	0.4034	0.4045	0.4991	0.5003	0.5016
76	54	48	51	51		76	0.1453	0.1452	0.1449	0.1444	0.1439	0.1434	0.1428	0.1422	0.1414	0.1406	0.2328	0.2327	0.2328	0.2329	0.2332	0.2336	0.2341	0.2345	0.235	0.2355	0.1867	0.1869	0.1871	0.1873	0.1876	0.188	0.1883	0.1887	0.1891	0.1896	0.3722	0.3735	0.3748	0.3761	0.3774	0.3787	0.3799	0.3812	0.3824	0.3836	0.4768	0.4782	0.4795
77	55	48	51	51		77	0.1344	0.1343	0.134	0.1335	0.133	0.1324	0.1318	0.1311	0.1303	0.1294	0.2177	0.2176	0.2176	0.2178	0.218	0.2184	0.2188	0.2192	0.2197	0.2202	0.1737	0.1739	0.1741	0.1743	0.1746	0.175	0.1753	0.1757	0.1761	0.1766	0.3526	0.3539	0.3552	0.3566	0.3579	0.3593	0.3606	0.3619	0.3632	0.3645	0.4561	0.4575	0.459
78	55	49	51	52		78	0.1227	0.1226	0.1223	0.1219	0.1214	0.1209	0.1204	0.1198	0.1192	0.1184	0.2025	0.2025	0.2025	0.2027	0.203	0.2034	0.2039	0.2044	0.2049	0.2054	0.1613	0.1615	0.1617	0.162	0.1623	0.1626	0.163	0.1634	0.1638	0.1642	0.3333	0.3347	0.3362	0.3376	0.339	0.3404	0.3418	0.3432	0.3446	0.3459	0.4357	0.4373	0.4388
79	56	49	52	52		79	0.1129	0.1128	0.1125	0.1121	0.1117	0.1112	0.1107	0.1102	0.1096	0.1089	0.189	0.1889	0.189	0.1892	0.1895	0.1899	0.1904	0.1909	0.1914	0.192	0.1502	0.1503	0.1505	0.1508	0.1511	0.1514	0.1518	0.1522	0.1526	0.153	0.3154	0.3168	0.3183	0.3198	0.3213	0.3227	0.3242	0.3256	0.3271	0.3285	0.4163	0.4179	0.4196
80	56	50	52	53		80	0.1044	0.1043	0.104	0.1036	0.1032	0.1027	0.1022	0.1017	0.1011	0.1004	0.1766	0.1765	0.1766	0.1768	0.1771	0.1775	0.178	0.1785	0.179	0.1795	0.1399	0.14	0.1403	0.1405	0.1408	0.1411	0.1415	0.1419	0.1423	0.1427	0.2984	0.2999	0.3014	0.3029	0.3045	0.306	0.3075	0.309	0.3105	0.3119	0.3976	0.3994	0.4011
81	56	50	53	53		81	0.0968	0.0967	0.0964	0.096	0.0956	0.0951	0.0946	0.0941	0.0935	0.0928	0.1651	0.165	0.1651	0.1653	0.1656	0.166	0.1664	0.1669	0.1674	0.168	0.1304	0.1305	0.1307	0.131	0.1312	0.1316	0.1319	0.1323	0.1327	0.1332	0.2822	0.2837	0.2853	0.2869	0.2884	0.29	0.2916	0.2931	0.2947	0.2962	0.3796	0.3815	0.3833
82	57	51	53	53		82	0.0899	0.0898	0.0895	0.0891	0.0887	0.0882	0.0877	0.0872	0.0865	0.0858	0.1544	0.1543	0.1544	0.1546	0.1549	0.1552	0.1557	0.1561	0.1566	0.1571	0.1215	0.1217	0.1219	0.1221	0.1224	0.1227	0.1231	0.1235	0.1239	0.1243	0.2667	0.2683	0.27	0.2716	0.2732	0.2748	0.2764	0.278	0.2796	0.2812	0.3623	0.3642	0.3661
83	57	51	53	54		83	0.0836	0.0835	0.0832	0.0828	0.0824	0.0819	0.0814	0.0808	0.0802	0.0794	0.1444	0.1444	0.1444	0.1446	0.1448	0.1452	0.1456	0.1461	0.1466	0.1471	0.1133	0.1135	0.1137	0.1139	0.1142	0.1145	0.1149	0.1153	0.1157	0.1161	0.2521	0.2537	0.2554	0.257	0.2587	0.2604	0.262	0.2636	0.2653	0.2669	0.3456	0.3476	0.3496
84	57	51	54	54		84	0.0778	0.0777	0.0774	0.077	0.0766	0.0761	0.0756	0.075	0.0744	0.0736	0.1351	0.135	0.135	0.1352	0.1354	0.1358	0.1362	0.1366	0.1371	0.1376	0.1057	0.1058	0.106	0.1062	0.1065	0.1068	0.1072	0.1076	0.108	0.1084	0.2381	0.2398	0.2414	0.2431	0.2448	0.2465	0.2482	0.2499	0.2515	0.2532	0.3295	0.3316	0.3336
85	57	52	54	54		85	0.676	0.6713	0.6663	0.6607	0.6547	0.648	0.6406	0.6324	0.6231	0.6125	0.6588	0.6561	0.6533	0.6503	0.6472	0.6439	0.6404	0.6367	0.6328	0.6286	0.5404	0.5404	0.5403	0.5402	0.5402	0.5401	0.54	0.54	0.5399	0.5399	0.7472	0.7468	0.7464	0.7459	0.7455	0.7451	0.7446	0.7442	0.7437	0.7433	0.8136	0.8132	0.8127
86	58	53	54	55		86	0.6004	0.5971	0.5936	0.59	0.5861	0.5821	0.5778	0.5733	0.5686	0.5635	0.6256	0.6246	0.6237	0.6228	0.6218	0.6208	0.6198	0.6188	0.6178	0.6168	0.5301	0.5304	0.5308	0.5311	0.5315	0.5318	0.5322	0.5325	0.5329	0.5333	0.7424	0.7426	0.7427	0.7429	0.7431	0.7433	0.7435	0.7437	0.7439	0.7441	0.8148	0.8149	0.8151
87	59	53	55	56		87	0.5033	0.5032	0.5031	0.5029	0.5027	0.5025	0.5022	0.5019	0.5016	0.5012	0.5806	0.5808	0.581	0.5812	0.5814	0.5817	0.5819	0.5821	0.5823	0.5824	0.4981	0.4985	0.4989	0.4994	0.4998	0.5002	0.5006	0.5011	0.5015	0.5019	0.7168	0.7171	0.7175	0.7178	0.7182	0.7185	0.7188	0.7192	0.7195	0.7199	0.7949	0.7952	0.7954
88	59	54	56	56		88	0.6153	0.6124	0.6093	0.6062	0.6028	0.5993	0.5956	0.5917	0.5875	0.5832	0.6403	0.6396	0.6389	0.6381	0.6374	0.6367	0.6359	0.6351	0.6343	0.6335	0.5459	0.5464	0.5468	0.5472	0.5477	0.5481	0.5485	0.549	0.5494	0.5499	0.7556	0.7558	0.7561	0.7563	0.7566	0.7569	0.7571	0.7574	0.7577	0.7579	0.8261	0.8263	0.8265
89	60	55	56	57		89	0.5702	0.5684	0.5665	0.5646	0.5627	0.5606	0.5585	0.5563	0.554	0.5516	0.6178	0.6176	0.6174	0.6172	0.617	0.6168	0.6165	0.6163	0.6161	0.6158	0.5294	0.5298	0.5303	0.5307	0.5312	0.5317	0.5321	0.5326	0.5331	0.5335	0.7427	0.743	0.7433	0.7436	0.7439	0.7443	0.7446	0.7449	0.7453	0.7456	0.8161	0.8163	0.8166
90	60	55	57	57		90	0.4887	0.4892	0.4897	0.4902	0.4907	0.4911	0.4914	0.4917	0.492	0.4922	0.5739	0.5743	0.5746	0.5749	0.5753	0.5756	0.5759	0.5762	0.5766	0.5769	0.4929	0.4933	0.4937	0.4942	0.4946	0.495	0.4954	0.4959	0.4963	0.4967	0.7124	0.7128	0.7132	0.7135	0.7139	0.7143	0.7146	0.715	0.7153	0.7157	0.7914	0.7917	0.792
91	61	56	58	58		91	0.4581	0.4585	0.459	0.4594	0.4597	0.4601	0.4603	0.4606	0.4608	0.461	0.5494	0.5497	0.55	0.5503	0.5506	0.5509	0.5512	0.5514	0.5517	0.5519	0.4696	0.4699	0.4703	0.4707	0.471	0.4714	0.4718	0.4721	0.4725	0.4729	0.692	0.6923	0.6926	0.693	0.6933	0.6936	0.694	0.6943	0.6946	0.6949	0.774	0.7742	0.7745
92	61	57	58	59		92	0.4346	0.4349	0.4352	0.4354	0.4356	0.4358	0.4359	0.436	0.436	0.4361	0.5294	0.5296	0.5299	0.5301	0.5303	0.5305	0.5307	0.5309	0.5311	0.5313	0.4503	0.4507	0.451	0.4513	0.4516	0.452	0.4523	0.4526	0.453	0.4533	0.6746	0.6749	0.6752	0.6755	0.6759	0.6762	0.6765	0.6768	0.6771	0.6775	0.7591	0.7593	0.7596
93	62	57	59	59		93	0.4103	0.4106	0.4109	0.4112	0.4114	0.4116	0.4117	0.4118	0.4118	0.4118	0.5095	0.5097	0.5099	0.5101	0.5103	0.5105	0.5106	0.5108	0.5109	0.511	0.4316	0.4318	0.4321	0.4324	0.4327	0.433	0.4333	0.4337	0.434	0.4343	0.6572	0.6575	0.6579	0.6582	0.6585	0.6588	0.6592	0.6595	0.6598	0.6601	0.7441	0.7444	0.7446
94	62	58	59	60		94	0.4011	0.4009	0.4007	0.4004	0.4001	0.3998	0.3994	0.399	0.3986	0.3981	0.4979	0.498	0.4981	0.4982	0.4983	0.4983	0.4984	0.4984	0.4985	0.4985	0.42	0.4202	0.4205	0.4208	0.421	0.4213	0.4216	0.4219	0.4221	0.4224	0.6461	0.6463	0.6466	0.6469	0.6472	0.6475	0.6478	0.6481	0.6484	0.6486	0.734	0.7343	0.7345
95	63	58	60	60		95	0.4268	0.4248	0.4227	0.4205	0.4183	0.4161	0.4138	0.4114	0.4089	0.4064	0.5041	0.5038	0.5034	0.503	0.5026	0.5023	0.5019	0.5015	0.5011	0.5007	0.4219	0.4221	0.4223	0.4225	0.4227	0.423	0.4232	0.4234	0.4236	0.4239	0.6473	0.6475	0.6477	0.6479	0.6481	0.6483	0.6485	0.6486	0.6488	0.649	0.7343	0.7345	0.7346
96	63	58	60	61		96	0.3763	0.3766	0.3768	0.377	0.3771	0.3771	0.3771	0.3771	0.377	0.3768	0.4798	0.48	0.4801	0.4802	0.4803	0.4804	0.4804	0.4805	0.4805	0.4806	0.4035	0.4037	0.4039	0.4042	0.4044	0.4047	0.405	0.4053	0.4055	0.4058	0.6302	0.6305	0.6309	0.6312	0.6315	0.6319	0.6322	0.6325	0.6328	0.6331	0.7204	0.7207	0.7209
97	63	59	61	61		97	0.3582	0.3584	0.3586	0.3587	0.3588	0.3589	0.3588	0.3588	0.3586	0.3585	0.4639	0.464	0.4641	0.4642	0.4642	0.4643	0.4644	0.4644	0.4644	0.4644	0.3887	0.3889	0.3891	0.3893	0.3896	0.3898	0.3901	0.3904	0.3906	0.3909	0.6155	0.6159	0.6162	0.6166	0.6169	0.6172	0.6176	0.6179	0.6182	0.6185	0.7074	0.7076	0.7079
98	64	60	61	62		98	0.3417	0.3419	0.342	0.3421	0.3422	0.3422	0.3421	0.342	0.3418	0.3415	0.4488	0.4489	0.4489	0.449	0.449	0.449	0.4491	0.4491	0.449	0.449	0.3746	0.3748	0.375	0.3752	0.3754	0.3757	0.3759	0.3762	0.3765	0.3767	0.6013	0.6016	0.602	0.6023	0.6027	0.603	0.6033	0.6037	0.604	0.6043	0.6946	0.6949	0.6952
99	64	60	61	62		99	0.4264	0.4219	0.4172	0.4123	0.4071	0.4017	0.396	0.3901	0.3838	0.3771	0.4776	0.4762	0.4747	0.4733	0.4718	0.4703	0.4687	0.4672	0.4656	0.464	0.388	0.388	0.3881	0.3881	0.3882	0.3883	0.3884	0.3884	0.3886	0.3887	0.6131	0.6131	0.6132	0.6132	0.6133	0.6133	0.6134	0.6134	0.6135	0.6136	0.7027	0.7027	0.7028
100	64	60	62	62		100	0.4559	0.4515	0.4469	0.4421	0.4371	0.4319	0.4263	0.4205	0.4144	0.4079	0.5038	0.5025	0.5011	0.4997	0.4983	0.4969	0.4954	0.494	0.4925	0.491	0.4128	0.4128	0.4129	0.413	0.413	0.4131	0.4132	0.4133	0.4134	0.4135	0.6373	0.6373	0.6372	0.6372	0.6372	0.6371	0.6371	0.6371	0.6371	0.637	0.7236	0.7235	0.7235
101	65	61	62	63		101	0.3622	0.3624	0.3626	0.3627	0.3627	0.3626	0.3625	0.3623	0.362	0.3616	0.4665	0.4666	0.4667	0.4667	0.4667	0.4667	0.4667	0.4667	0.4666	0.4665	0.3906	0.3908	0.391	0.3912	0.3915	0.3917	0.392	0.3922	0.3925	0.3928	0.6174	0.6177	0.6181	0.6184	0.6187	0.619	0.6193	0.6197	0.62	0.6203	0.7089	0.7092	0.7095
102	65	61	63	63		102	0.5276	0.5224	0.5168	0.5109	0.5045	0.4978	0.4905	0.4827	0.4742	0.465	0.549	0.5469	0.5447	0.5425	0.5403	0.538	0.5356	0.5332	0.5308	0.5282	0.4469	0.4469	0.4469	0.4469	0.4469	0.4469	0.4469	0.447	0.447	0.4471	0.6686	0.6685	0.6683	0.6682	0.6681	0.668	0.6678	0.6677	0.6676	0.6675	0.7501	0.75	0.7499
103	65	62	63	63		103	0.4108	0.4109	0.4109	0.411	0.411	0.411	0.4109	0.4108	0.4107	0.4105	0.5084	0.5086	0.5087	0.5089	0.509	0.5092	0.5093	0.5095	0.5096	0.5097	0.4304	0.4306	0.4309	0.4312	0.4314	0.4317	0.432	0.4323	0.4326	0.4328	0.6558	0.6561	0.6563	0.6566	0.6568	0.6571	0.6573	0.6576	0.6578	0.6581	0.7423	0.7425	0.7427
104	66	62	64	64		104	0.391	0.3913	0.3916	0.3918	0.392	0.3922	0.3924	0.3924	0.3925	0.3925	0.4934	0.4936	0.4938	0.494	0.4941	0.4943	0.4945	0.4946	0.4948	0.4949	0.4167	0.4169	0.4172	0.4175	0.4177	0.418	0.4183	0.4185	0.4188	0.4191	0.6429	0.6432	0.6435	0.6438	0.6441	0.6444	0.6447	0.6449	0.6452	0.6455	0.7313	0.7315	0.7318
105	66	62	64	64		105	0.3732	0.3735	0.3738	0.3739	0.3741	0.3742	0.3742	0.3742	0.3741	0.374	0.4775	0.4776	0.4778	0.4779	0.478	0.4781	0.4782	0.4783	0.4784	0.4784	0.4015	0.4018	0.402	0.4022	0.4025	0.4028	0.403	0.4033	0.4036	0.4039	0.6283	0.6286	0.6289	0.6292	0.6296	0.6299	0.6302	0.6305	0.6308	0.6311	0.7186	0.7188	0.7191
106	66	63	64	65		106	0.3551	0.3554	0.3555	0.3557	0.3557	0.3558	0.3557	0.3556	0.3555	0.3553	0.461	0.4611	0.4612	0.4613	0.4613	0.4614	0.4614	0.4614	0.4615	0.4615	0.386	0.3862	0.3864	0.3866	0.3869	0.3871	0.3874	0.3876	0.3879	0.3882	0.6128	0.6132	0.6135	0.6139	0.6142	0.6145	0.6149	0.6152	0.6155	0.6159	0.705	0.7053	0.7056
107	67	63	65	65		107	0.3388	0.339	0.3391	0.3392	0.3393	0.3393	0.3392	0.3391	0.3389	0.3386	0.4461	0.4462	0.4462	0.4463	0.4463	0.4463	0.4464	0.4463	0.4463	0.4463	0.3721	0.3723	0.3725	0.3727	0.373	0.3732	0.3734	0.3737	0.374	0.3742	0.5987	0.5991	0.5994	0.5998	0.6001	0.6005	0.6008	0.6011	0.6015	0.6018	0.6923	0.6926	0.6929
108	67	64	65	65		108	0.3594	0.3576	0.3557	0.3537	0.3517	0.3497	0.3476	0.3454	0.3432	0.341	0.4475	0.4471	0.4468	0.4464	0.446	0.4456	0.4452	0.4448	0.4444	0.4439	0.3699	0.3701	0.3702	0.3704	0.3705	0.3707	0.3709	0.3711	0.3713	0.3715	0.5958	0.596	0.5962	0.5964	0.5967	0.5969	0.5971	0.5973	0.5975	0.5978	0.6885	0.6887	0.6889
109	67	64	65	66		109	0.322	0.3222	0.3223	0.3224	0.3224	0.3223	0.3221	0.3219	0.3216	0.3212	0.4302	0.4302	0.4302	0.4303	0.4302	0.4302	0.4302	0.4301	0.4301	0.43	0.3573	0.3575	0.3577	0.3578	0.358	0.3583	0.3585	0.3587	0.3589	0.3592	0.5831	0.5834	0.5838	0.5841	0.5844	0.5847	0.5851	0.5854	0.5857	0.586	0.6778	0.6781	0.6784
110	68	64	66	66		110	0.3072	0.3074	0.3075	0.3075	0.3075	0.3074	0.3072	0.307	0.3067	0.3063	0.4162	0.4162	0.4162	0.4162	0.4162	0.4161	0.4161	0.416	0.4159	0.4158	0.3445	0.3446	0.3448	0.345	0.3452	0.3454	0.3456	0.3458	0.3461	0.3463	0.5694	0.5698	0.5702	0.5705	0.5709	0.5713	0.5716	0.572	0.5723	0.5727	0.6655	0.6658	0.6661
111	68	65	66	66		111	0.2924	0.2926	0.2926	0.2926	0.2925	0.2923	0.2921	0.2917	0.2913	0.2908	0.4013	0.4013	0.4012	0.4012	0.4011	0.401	0.4008	0.4007	0.4005	0.4003	0.3305	0.3307	0.3308	0.331	0.3312	0.3314	0.3316	0.3319	0.3321	0.3324	0.5543	0.5547	0.5551	0.5556	0.556	0.5564	0.5568	0.5572	0.5576	0.5579	0.6518	0.6521	0.6525
112	68	65	66	67		112	0.4937	0.4872	0.4803	0.4728	0.4647	0.456	0.4464	0.436	0.4244	0.4114	0.504	0.5008	0.4975	0.4942	0.4907	0.487	0.4833	0.4794	0.4754	0.4712	0.394	0.3938	0.3935	0.3933	0.3931	0.3929	0.3927	0.3925	0.3923	0.3921	0.6162	0.6157	0.6153	0.6148	0.6144	0.6139	0.6135	0.613	0.6126	0.6122	0.7011	0.7007	0.7003
113	68	65	66	67		113	0.3515	0.3515	0.3515	0.3513	0.3511	0.3508	0.3505	0.35	0.3495	0.349	0.4553	0.4553	0.4553	0.4553	0.4553	0.4553	0.4552	0.4551	0.4551	0.455	0.38	0.3802	0.3804	0.3806	0.3808	0.3809	0.3811	0.3813	0.3815	0.3817	0.6062	0.6064	0.6066	0.6068	0.607	0.6071	0.6073	0.6075	0.6077	0.6079	0.6976	0.6978	0.6979
114	68	65	66	67		114	0.3341	0.3343	0.3345	0.3346	0.3347	0.3347	0.3347	0.3347	0.3346	0.3344	0.4424	0.4425	0.4426	0.4427	0.4428	0.4428	0.4429	0.443	0.443	0.443	0.3692	0.3694	0.3696	0.3698	0.37	0.3702	0.3704	0.3706	0.3708	0.371	0.5953	0.5956	0.5958	0.5961	0.5963	0.5966	0.5968	0.5971	0.5973	0.5975	0.6883	0.6885	0.6887
115	68	65	66	67		115	0.3277	0.3274	0.3271	0.3267	0.3262	0.3257	0.3252	0.3246	0.324	0.3233	0.432	0.432	0.432	0.4319	0.4319	0.4318	0.4317	0.4316	0.4315	0.4314	0.3586	0.3588	0.3589	0.3591	0.3593	0.3595	0.3597	0.3599	0.3601	0.3604	0.5843	0.5846	0.5849	0.5852	0.5855	0.5858	0.586	0.5863	0.5866	0.5869	0.6786	0.6788	0.6791
116	68	65	66	67		116	0.309	0.3092	0.3093	0.3093	0.3093	0.3092	0.309	0.3088	0.3085	0.3081	0.4179	0.4179	0.418	0.418	0.4179	0.4179	0.4178	0.4178	0.4177	0.4176	0.3461	0.3463	0.3464	0.3466	0.3468	0.347	0.3472	0.3475	0.3477	0.3479	0.5712	0.5715	0.5719	0.5722	0.5726	0.5729	0.5733	0.5736	0.5739	0.5742	0.6669	0.6672	0.6675
117	68	65	66	67		117	0.2939	0.2941	0.2941	0.2941	0.294	0.2938	0.2936	0.2932	0.2928	0.2923	0.4027	0.4027	0.4027	0.4026	0.4025	0.4024	0.4023	0.4021	0.402	0.4018	0.3319	0.332	0.3321	0.3323	0.3325	0.3327	0.3329	0.3332	0.3334	0.3337	0.5557	0.5561	0.5566	0.557	0.5574	0.5578	0.5582	0.5586	0.559	0.5593	0.6531	0.6534	0.6538
118	68	65	66	67		118	0.28	0.2802	0.2802	0.2802	0.2801	0.2799	0.2796	0.2792	0.2788	0.2782	0.389	0.3889	0.3889	0.3888	0.3887	0.3885	0.3884	0.3882	0.388	0.3878	0.3193	0.3195	0.3196	0.3198	0.3199	0.3201	0.3204	0.3206	0.3208	0.3211	0.5417	0.5422	0.5426	0.5431	0.5435	0.5439	0.5443	0.5447	0.5451	0.5455	0.64	0.6404	0.6408
119	68	65	66	67		119	0.2667	0.2668	0.2669	0.2668	0.2666	0.2664	0.2661	0.2656	0.2651	0.2645	0.3752	0.3751	0.375	0.3749	0.3747	0.3745	0.3743	0.3741	0.3739	0.3736	0.3066	0.3068	0.3069	0.307	0.3072	0.3074	0.3076	0.3079	0.3081	0.3084	0.5273	0.5277	0.5282	0.5287	0.5292	0.5296	0.5301	0.5305	0.531	0.5314	0.6265	0.627	0.6274
120	68	65	66	67		120	0.2525	0.2526	0.2526	0.2525	0.2522	0.2519	0.2514	0.2508	0.2501	0.2493	0.3595	0.3593	0.3591	0.3589	0.3587	0.3584	0.3581	0.3578	0.3574	0.357	0.2919	0.2919	0.2921	0.2922	0.2924	0.2926	0.2928	0.2931	0.2934	0.2937	0.5101	0.5107	0.5112	0.5118	0.5123	0.5129	0.5134	0.5139	0.5144	0.515	0.6107	0.6112	0.6117
121	68	65	66	67		121	0.237	0.2371	0.2369	0.2367	0.2363	0.2357	0.235	0.2342	0.2331	0.232	0.341	0.3408	0.3405	0.3401	0.3397	0.3393	0.3388	0.3383	0.3377	0.3371	0.2742	0.2743	0.2744	0.2745	0.2747	0.275	0.2752	0.2755	0.2758	0.2762	0.489	0.4898	0.4905	0.4912	0.4919	0.4926	0.4933	0.4939	0.4946	0.4952	0.5915	0.5921	0.5927
122	68	65	66	67		122	0.2389	0.2378	0.2367	0.2356	0.2344	0.2331	0.2319	0.2305	0.2291	0.2277	0.3363	0.3361	0.3358	0.3354	0.3351	0.3348	0.3344	0.334	0.3336	0.3332	0.2709	0.271	0.2711	0.2712	0.2713	0.2715	0.2717	0.2719	0.2721	0.2723	0.4841	0.4845	0.485	0.4855	0.4859	0.4864	0.4868	0.4873	0.4877	0.4881	0.5842	0.5847	0.5851
123	68	65	66	67		123	0.2355	0.2344	0.2332	0.232	0.2308	0.2295	0.2281	0.2267	0.2252	0.2236	0.3319	0.3316	0.3313	0.3309	0.3306	0.3302	0.3298	0.3294	0.329	0.3286	0.2668	0.2668	0.2669	0.267	0.2672	0.2673	0.2675	0.2676	0.2678	0.268	0.4787	0.4791	0.4795	0.4799	0.4803	0.4807	0.4811	0.4814	0.4818	0.4822	0.5783	0.5786	0.579
124	68	65	66	67		124	0.215	0.2149	0.2147	0.2143	0.2138	0.213	0.2121	0.2111	0.2098	0.2084	0.315	0.3146	0.3142	0.3137	0.3132	0.3127	0.3121	0.3114	0.3107	0.31	0.2505	0.2505	0.2506	0.2507	0.2509	0.2511	0.2513	0.2516	0.2519	0.2522	0.4588	0.4595	0.4602	0.4609	0.4616	0.4623	0.4629	0.4636	0.4642	0.4648	0.561	0.5617	0.5623
125	68	65	66	67		125	0.2014	0.2014	0.2012	0.2008	0.2003	0.1996	0.1987	0.1977	0.1965	0.1952	0.2999	0.2996	0.2992	0.2988	0.2983	0.2977	0.2972	0.2965	0.2958	0.2951	0.2375	0.2376	0.2377	0.2378	0.238	0.2382	0.2384	0.2387	0.239	0.2393	0.442	0.4428	0.4436	0.4444	0.4451	0.4459	0.4466	0.4473	0.448	0.4487	0.5447	0.5454	0.5461
126	68	65	66	67		126	0.1882	0.1881	0.1878	0.1873	0.1866	0.1857	0.1846	0.1832	0.1816	0.1798	0.2816	0.2811	0.2805	0.2799	0.2792	0.2784	0.2775	0.2766	0.2756	0.2745	0.2196	0.2197	0.2197	0.2199	0.2201	0.2203	0.2206	0.221	0.2214	0.2218	0.4184	0.4195	0.4206	0.4217	0.4227	0.4237	0.4247	0.4257	0.4266	0.4275	0.523	0.524	0.5249
127	68	65	66	67		127	0.1746	0.1745	0.1741	0.1736	0.1728	0.1718	0.1705	0.169	0.1672	0.1652	0.2637	0.2631	0.2624	0.2616	0.2608	0.2599	0.2589	0.2578	0.2567	0.2554	0.2032	0.2033	0.2033	0.2035	0.2037	0.204	0.2043	0.2047	0.2051	0.2056	0.3957	0.397	0.3983	0.3996	0.4008	0.402	0.4031	0.4043	0.4054	0.4064	0.501	0.5021	0.5033
128	68	65	66	67		128	0.1617	0.1615	0.1611	0.1605	0.1596	0.1585	0.1571	0.1554	0.1534	0.1512	0.2458	0.2451	0.2444	0.2435	0.2425	0.2415	0.2403	0.2391	0.2377	0.2362	0.1869	0.1869	0.187	0.1872	0.1874	0.1877	0.1881	0.1885	0.189	0.1895	0.3723	0.3739	0.3754	0.3769	0.3783	0.3797	0.381	0.3824	0.3836	0.3849	0.4781	0.4795	0.4808
129	68	65	66	67		129	0.1489	0.1487	0.1482	0.1475	0.1464	0.1451	0.1434	0.1415	0.1391	0.1364	0.2262	0.2253	0.2243	0.2233	0.222	0.2207	0.2192	0.2177	0.2159	0.214	0.1681	0.1681	0.1682	0.1684	0.1686	0.1689	0.1694	0.1698	0.1704	0.171	0.3444	0.3463	0.3482	0.35	0.3517	0.3534	0.355	0.3566	0.3582	0.3597	0.451	0.4527	0.4543
130	68	65	66	67		130	0.235	0.2272	0.219	0.2105	0.2014	0.1919	0.1817	0.1709	0.1593	0.1465	0.235	0.2315	0.228	0.2245	0.221	0.2174	0.2137	0.2099	0.206	0.202	0.1577	0.1575	0.1574	0.1574	0.1575	0.1577	0.158	0.1583	0.1588	0.1593	0.3256	0.3273	0.329	0.3306	0.3321	0.3337	0.3352	0.3367	0.3381	0.3395	0.4287	0.4303	0.432
131	68	65	66	67		131	0.2042	0.1995	0.1945	0.1891	0.1832	0.1768	0.1698	0.1621	0.1536	0.144	0.2331	0.2304	0.2275	0.2246	0.2215	0.2183	0.2149	0.2115	0.2078	0.204	0.1595	0.1593	0.1592	0.1591	0.1591	0.1592	0.1594	0.1596	0.1598	0.1602	0.3267	0.3278	0.3289	0.3299	0.331	0.332	0.3331	0.3341	0.3351	0.336	0.4243	0.4254	0.4265
132	68	65	66	67		132	0.4075	0.3984	0.3884	0.3775	0.3654	0.3518	0.3364	0.3187	0.2977	0.272	0.3706	0.3628	0.3545	0.3456	0.3359	0.3255	0.3142	0.3017	0.2878	0.2723	0.215	0.2136	0.2122	0.2109	0.2097	0.2085	0.2074	0.2064	0.2055	0.2046	0.3918	0.3894	0.387	0.3848	0.3827	0.3807	0.3787	0.3769	0.3752	0.3735	0.4629	0.4612	0.4596
133	68	65	66	67		133	0.4931	0.4851	0.4765	0.4671	0.4567	0.4451	0.4321	0.4174	0.4004	0.3804	0.4743	0.4687	0.4629	0.4567	0.4501	0.4431	0.4355	0.4274	0.4186	0.409	0.3364	0.3355	0.3346	0.3336	0.3327	0.3318	0.3309	0.33	0.3291	0.3283	0.5481	0.5461	0.544	0.5419	0.5399	0.5378	0.5357	0.5336	0.5316	0.5295	0.6223	0.6201	0.6179
134	68	65	66	67		134	0.2735	0.2743	0.2746	0.2747	0.2745	0.2739	0.2731	0.2719	0.2705	0.2688	0.379	0.3785	0.3781	0.3775	0.3769	0.3762	0.3755	0.3747	0.3738	0.3729	0.3059	0.3059	0.306	0.306	0.306	0.3061	0.3062	0.3062	0.3063	0.3064	0.5246	0.5247	0.5247	0.5247	0.5247	0.5247	0.5247	0.5246	0.5246	0.5245	0.6194	0.6193	0.6192
135	68	65	66	67		135	0.2314	0.2331	0.2345	0.2357	0.2365	0.2372	0.2376	0.2377	0.2377	0.2374	0.3471	0.3471	0.3469	0.3468	0.3465	0.3462	0.3459	0.3455	0.345	0.3445	0.2808	0.2809	0.281	0.2811	0.2812	0.2813	0.2815	0.2816	0.2818	0.282	0.4959	0.4962	0.4965	0.4968	0.4971	0.4974	0.4976	0.4979	0.4981	0.4984	0.5942	0.5944	0.5946
136	68	65	66	67		136	0.2021	0.2047	0.207	0.209	0.2107	0.2122	0.2134	0.2143	0.215	0.2156	0.3238	0.3239	0.324	0.324	0.3239	0.3239	0.3237	0.3235	0.3233	0.323	0.2619	0.262	0.2621	0.2622	0.2624	0.2626	0.2628	0.263	0.2632	0.2635	0.473	0.4735	0.474	0.4745	0.475	0.4755	0.4759	0.4764	0.4768	0.4772	0.5733	0.5737	0.5741
137	68	65	66	67		137	0.1736	0.1777	0.1814	0.1845	0.1873	0.1898	0.1919	0.1937	0.1952	0.1965	0.3026	0.3028	0.3031	0.3032	0.3033	0.3034	0.3034	0.3033	0.3032	0.303	0.2445	0.2446	0.2447	0.2449	0.2451	0.2453	0.2455	0.2458	0.2461	0.2464	0.4512	0.452	0.4527	0.4534	0.454	0.4547	0.4553	0.456	0.4566	0.4571	0.5532	0.5538	0.5544
138	68	65	66	67		138	0.1576	0.1614	0.1649	0.168	0.1709	0.1734	0.1757	0.1777	0.1795	0.181	0.2845	0.2848	0.2851	0.2853	0.2855	0.2856	0.2856	0.2856	0.2856	0.2855	0.2293	0.2294	0.2295	0.2297	0.2299	0.2301	0.2304	0.2307	0.231	0.2314	0.4314	0.4322	0.4331	0.4339	0.4347	0.4355	0.4363	0.4371	0.4378	0.4385	0.5342	0.535	0.5357
139	68	65	66	67		139	0.1407	0.145	0.1489	0.1523	0.1554	0.1582	0.1606	0.1627	0.1646	0.1662	0.2664	0.2667	0.2669	0.2671	0.2673	0.2673	0.2673	0.2672	0.2671	0.2668	0.2132	0.2133	0.2135	0.2136	0.2139	0.2141	0.2144	0.2148	0.2152	0.2156	0.4097	0.4108	0.4119	0.4129	0.414	0.4149	0.4159	0.4168	0.4178	0.4186	0.5137	0.5146	0.5156
140	68	65	66	67		140	0.1345	0.1378	0.1408	0.1436	0.1461	0.1483	0.1503	0.152	0.1535	0.1548	0.2521	0.2524	0.2526	0.2527	0.2528	0.2528	0.2528	0.2527	0.2525	0.2523	0.2008	0.2009	0.201	0.2012	0.2014	0.2017	0.202	0.2024	0.2027	0.2032	0.3921	0.3932	0.3944	0.3955	0.3965	0.3976	0.3986	0.3996	0.4005	0.4015	0.4956	0.4966	0.4976
141	68	65	66	67		141	0.1115	0.1168	0.1214	0.1254	0.1289	0.1319	0.1345	0.1366	0.1384	0.1398	0.2325	0.2327	0.2328	0.2328	0.2328	0.2326	0.2323	0.2319	0.2314	0.2308	0.1825	0.1826	0.1827	0.1829	0.1832	0.1835	0.1839	0.1844	0.1848	0.1854	0.3662	0.3678	0.3693	0.3708	0.3723	0.3737	0.3751	0.3764	0.3777	0.3789	0.4717	0.4731	0.4744
142	68	65	66	67		142	0.521	0.513	0.5042	0.4945	0.4838	0.4719	0.4584	0.4429	0.4248	0.4031	0.4927	0.4866	0.48	0.473	0.4654	0.4572	0.4483	0.4386	0.4278	0.4158	0.3419	0.3407	0.3394	0.3382	0.337	0.3358	0.3347	0.3335	0.3323	0.3312	0.551	0.5483	0.5457	0.543	0.5403	0.5376	0.5349	0.5321	0.5294	0.5266	0.6189	0.616	0.6131
143	68	65	66	67		143	0.2558	0.2585	0.2607	0.2624	0.2637	0.2645	0.265	0.2651	0.2648	0.2642	0.3748	0.3746	0.3743	0.374	0.3736	0.3731	0.3725	0.3719	0.3712	0.3705	0.3038	0.3038	0.3039	0.3039	0.304	0.3041	0.3042	0.3044	0.3045	0.3046	0.5227	0.5229	0.523	0.5232	0.5233	0.5234	0.5235	0.5236	0.5237	0.5238	0.6188	0.6188	0.6189
144	68	65	66	67		144	0.1971	0.2028	0.2077	0.212	0.2157	0.2189	0.2217	0.2241	0.2262	0.2279	0.3378	0.3381	0.3384	0.3387	0.3388	0.3389	0.339	0.3389	0.3388	0.3387	0.2757	0.2758	0.276	0.2761	0.2763	0.2765	0.2767	0.2769	0.2771	0.2774	0.4904	0.4909	0.4914	0.4919	0.4923	0.4928	0.4932	0.4936	0.494	0.4944	0.5904	0.5907	0.5911
145	68	65	66	67		145	0.1588	0.1662	0.1728	0.1786	0.1839	0.1885	0.1927	0.1965	0.1999	0.2029	0.3105	0.3111	0.3117	0.3123	0.3127	0.3131	0.3135	0.3137	0.314	0.3141	0.2542	0.2544	0.2545	0.2547	0.2549	0.2551	0.2554	0.2557	0.256	0.2563	0.4641	0.4648	0.4655	0.4662	0.4669	0.4676	0.4682	0.4688	0.4694	0.47	0.5662	0.5668	0.5674
146	68	65	66	67		146	0.1458	0.152	0.1577	0.1629	0.1675	0.1717	0.1756	0.179	0.1821	0.185	0.2896	0.2902	0.2908	0.2913	0.2917	0.2921	0.2924	0.2927	0.2929	0.293	0.2359	0.236	0.2361	0.2363	0.2366	0.2368	0.2371	0.2375	0.2378	0.2382	0.4405	0.4414	0.4423	0.4432	0.444	0.4449	0.4457	0.4464	0.4472	0.4479	0.544	0.5447	0.5455
147	68	65	66	67		147	0.1811	0.1805	0.1799	0.1795	0.1791	0.1787	0.1784	0.178	0.1777	0.1772	0.2792	0.2791	0.2789	0.2788	0.2786	0.2783	0.2781	0.2777	0.2774	0.277	0.2219	0.222	0.2221	0.2223	0.2225	0.2227	0.223	0.2233	0.2236	0.224	0.4213	0.4223	0.4232	0.4242	0.4251	0.4259	0.4268	0.4276	0.4284	0.4292	0.5247	0.5256	0.5264
148	68	65	66	67		148	0.6828	0.6788	0.6745	0.6698	0.6648	0.6593	0.6532	0.6466	0.6393	0.6311	0.6731	0.6713	0.6693	0.6672	0.6651	0.6628	0.6605	0.658	0.6554	0.6527	0.5636	0.5638	0.564	0.5642	0.5645	0.5647	0.5649	0.5651	0.5654	0.5656	0.7675	0.7674	0.7674	0.7673	0.7672	0.7671	0.7671	0.767	0.7669	0.7669	0.833	0.8329	0.8329
149	68	65	66	67		149	0.4851	0.4861	0.487	0.4879	0.4887	0.4895	0.4903	0.491	0.4916	0.4922	0.574	0.5745	0.5749	0.5753	0.5757	0.5762	0.5766	0.577	0.5773	0.5777	0.4937	0.4941	0.4946	0.495	0.4954	0.4959	0.4963	0.4967	0.4972	0.4976	0.7132	0.7136	0.7139	0.7143	0.7147	0.7151	0.7154	0.7158	0.7162	0.7165	0.7921	0.7924	0.7927
150	68	65	66	67		150	0.4546	0.4553	0.456	0.4567	0.4574	0.4579	0.4585	0.459	0.4595	0.4599	0.5487	0.5491	0.5494	0.5498	0.5501	0.5505	0.5508	0.5511	0.5514	0.5517	0.4694	0.4697	0.4701	0.4705	0.4708	0.4712	0.4716	0.472	0.4724	0.4727	0.6918	0.6921	0.6925	0.6928	0.6932	0.6935	0.6938	0.6942	0.6945	0.6948	0.7739	0.7742	0.7744
151	68	65	66	67		151	0.4329	0.4336	0.4343	0.4349	0.4355	0.4361	0.4366	0.4371	0.4376	0.438	0.5312	0.5315	0.5319	0.5322	0.5325	0.5328	0.5331	0.5334	0.5337	0.534	0.4529	0.4532	0.4536	0.4539	0.4542	0.4546	0.4549	0.4552	0.4556	0.4559	0.6769	0.6772	0.6775	0.6778	0.6781	0.6784	0.6788	0.6791	0.6794	0.6797	0.7609	0.7612	0.7614
152	68	65	66	67		152	0.4093	0.4103	0.4113	0.4123	0.4132	0.4141	0.4149	0.4157	0.4165	0.4172	0.5142	0.5146	0.515	0.5154	0.5157	0.5161	0.5164	0.5167	0.5171	0.5174	0.4375	0.4378	0.4381	0.4384	0.4387	0.439	0.4393	0.4397	0.44	0.4403	0.6627	0.663	0.6633	0.6636	0.6639	0.6642	0.6645	0.6648	0.6651	0.6654	0.7487	0.7489	0.7492
153	68	65	66	67		153	0.3812	0.3829	0.3845	0.386	0.3875	0.3889	0.3903	0.3916	0.3928	0.394	0.495	0.4955	0.4959	0.4963	0.4968	0.4972	0.4976	0.498	0.4984	0.4987	0.4203	0.4205	0.4208	0.4211	0.4214	0.4217	0.422	0.4223	0.4226	0.4229	0.6466	0.6469	0.6472	0.6475	0.6479	0.6482	0.6485	0.6488	0.6491	0.6495	0.7348	0.7351	0.7353
154	68	65	66	67		154	0.3578	0.3599	0.3618	0.3637	0.3654	0.3671	0.3688	0.3703	0.3718	0.3732	0.4773	0.4778	0.4782	0.4787	0.4792	0.4796	0.48	0.4804	0.4808	0.4812	0.4042	0.4044	0.4047	0.405	0.4052	0.4055	0.4058	0.4061	0.4064	0.4067	0.631	0.6314	0.6317	0.632	0.6324	0.6327	0.633	0.6333	0.6337	0.634	0.7211	0.7214	0.7217
155	68	65	66	67		155	0.3375	0.3397	0.3418	0.3438	0.3458	0.3476	0.3493	0.351	0.3526	0.3541	0.4606	0.4611	0.4616	0.462	0.4625	0.4629	0.4633	0.4638	0.4641	0.4645	0.3889	0.3891	0.3894	0.3896	0.3899	0.3901	0.3904	0.3907	0.391	0.3913	0.6159	0.6162	0.6166	0.6169	0.6173	0.6176	0.6179	0.6183	0.6186	0.6189	0.7077	0.708	0.7083
156	68	65	66	67		156	0.3188	0.3211	0.3234	0.3255	0.3275	0.3294	0.3313	0.333	0.3346	0.3362	0.4446	0.4451	0.4455	0.446	0.4464	0.4469	0.4473	0.4477	0.448	0.4484	0.3741	0.3744	0.3746	0.3748	0.3751	0.3753	0.3756	0.3759	0.3761	0.3764	0.6009	0.6013	0.6017	0.602	0.6024	0.6027	0.6031	0.6034	0.6038	0.6041	0.6944	0.6947	0.695
157	68	65	66	67		157	0.3016	0.304	0.3063	0.3085	0.3105	0.3125	0.3143	0.3161	0.3177	0.3193	0.4291	0.4295	0.43	0.4304	0.4308	0.4312	0.4316	0.432	0.4323	0.4327	0.3599	0.3601	0.3603	0.3605	0.3607	0.361	0.3612	0.3615	0.3618	0.362	0.5861	0.5865	0.5869	0.5872	0.5876	0.588	0.5883	0.5887	0.589	0.5894	0.681	0.6813	0.6816
158	68	65	66	67		158	0.2858	0.2883	0.2905	0.2927	0.2947	0.2966	0.2985	0.3001	0.3017	0.3032	0.414	0.4144	0.4148	0.4152	0.4156	0.416	0.4163	0.4167	0.417	0.4173	0.3459	0.3461	0.3463	0.3465	0.3467	0.347	0.3472	0.3475	0.3478	0.348	0.5713	0.5717	0.5721	0.5725	0.5729	0.5733	0.5736	0.574	0.5744	0.5748	0.6674	0.6678	0.6681
159	68	65	66	67		159	0.2608	0.264	0.267	0.2697	0.2722	0.2746	0.2768	0.2788	0.2807	0.2824	0.3939	0.3943	0.3948	0.3952	0.3955	0.3959	0.3962	0.3965	0.3968	0.397	0.3277	0.3279	0.328	0.3283	0.3285	0.3287	0.329	0.3293	0.3296	0.3299	0.5516	0.5521	0.5526	0.5531	0.5536	0.5541	0.5546	0.555	0.5555	0.5559	0.6499	0.6504	0.6508
160	68	65	66	67		160	0.2559	0.2579	0.2598	0.2616	0.2633	0.2648	0.2663	0.2676	0.2689	0.2701	0.3815	0.3818	0.3821	0.3824	0.3827	0.383	0.3832	0.3834	0.3836	0.3838	0.3158	0.316	0.3162	0.3164	0.3166	0.3168	0.317	0.3173	0.3175	0.3178	0.538	0.5385	0.539	0.5394	0.5399	0.5403	0.5408	0.5412	0.5416	0.542	0.6367	0.6371	0.6375
161	68	65	66	67		161	0.2491	0.2506	0.2521	0.2534	0.2547	0.2559	0.257	0.2579	0.2589	0.2597	0.3708	0.3711	0.3714	0.3716	0.3718	0.372	0.3721	0.3723	0.3724	0.3725	0.3057	0.3059	0.306	0.3062	0.3064	0.3066	0.3068	0.3071	0.3073	0.3076	0.5263	0.5267	0.5272	0.5276	0.528	0.5285	0.5289	0.5293	0.5297	0.5301	0.6253	0.6257	0.6261
[truncated: 360 more columns]

[truncated: 2 more sheets: Figure 11, Figure 12]
